# Supplementary material for: Molecular Genetic Features of Polyploidization and Aneuploidization Reveal Unique Patterns for Genome Duplication in Diploid Malus
Source: PubMed Central journal article supplement (PMC3254611; doi:10.1371/journal.pone.0029449), 2012-01-10
Supplement: pone.0029449.s002.pdf [file pone.0029449.s002.pdf]

| Markers    | Aneuploid seedlings from the cross of 'Gala × Fuji' |      |      |      |      |      |      |      |      |      |      |      |      |      |      |      |      |      |      |      |      |
|------------|-----------------------------------------------------|------|------|------|------|------|------|------|------|------|------|------|------|------|------|------|------|------|------|------|------|
|            | LG                                                  | GF01 | GF02 | GF03 | GF04 | GF05 | GF06 | GF07 | GF08 | GF09 | GF10 | GF11 | GF12 | GF13 | GF14 | GF15 | GF16 | GF17 | GF18 | GF19 | GF20 |
| CH05g08    | 1                                                   | ad   | bd   | ac   | bc   | ad   | ad   | bd   | bd   | bc   | bc   | bd   | bc   | bc   | bd   | ac   | ac   | ad   | bd   | bc   | ad   |
| Hi07d08    | 1                                                   | bd   | ad   | bc   | ac   | bc   | bc   | ac   | ac   | ad   | ad   | ac   | ad   | ad   | ac   | bd   | bd   | bc   | ac   | ad   | bc   |
| Hi12c02    | 1                                                   | ac   | ac   | bd   | ad   | ad   | bc   | bc   | ad   | ac   | ad   | ad   | bc   | ac   | ad   | bc   | bc   | bc   | ad   | ad   | bc   |
| KA4B       | 1                                                   | hk   | hk   | h-   | kk   | h-   | h-   | h-   | kk   | hk   | kk   | kk   | h-   | hk   | kk   | h-   | h-   | h-   | kk   | kk   | h-   |
| Hi02c07    | 1                                                   | ll   | ll   | lm   | lm   | lm   | lm   | lm   | ll   | lm   | ll   | ll   | lm   | lm   | ll   | lm   | lm   | lm   | ll   | ll   | lm   |
| Hi02b10    | 1                                                   | nn   | nn   | np   | np   | nn   | np   | np   | nn   | np   | nn   | np   | --   | nn   | np   | np   | np   | nn   | nn   | np   | np   |
| CH02a04z   | 2                                                   | b    | bc   | bc   | bd   | bd   | bc   | bd   | ac   | acd  | bd   | bcd  | bcd  | ad   | bd   | ad   | bd   | ad   | bcd  | bcd  | ac   |
| CH02c02a_3 | 2                                                   | b    | bd   | bc   | bc   | bc   | bd   | bc   | ad   | ac-  | ad   | ac-  | ac-  | ad   | bc   | ac   | bc   | ac   | ac-  | ac-  | bc   |
| CH02c06    | 2                                                   | a    | bc   | bd   | bc   | bc   | bd   | bc   | ad   | bcd  | ad   | acd  | acd  | ac   | bd   | ac   | bc   | ac   | acd  | acd  | bc   |
| CH03d01    | 2                                                   | -    | ad   | ac   | ad   | ad   | ac   | ad   | bc   | c--  | ad   | ac-  | ac-  | bd   | ac   | bd   | ad   | bd   | ac-  | ac-  | bc   |
| CH05e03    | 2                                                   | b    | ac   | ad   | ac   | ac   | ad   | ac   | bd   | bcd  | ac   | acd  | acd  | bc   | ad   | bc   | ac   | bc   | acd  | acd  | bd   |
| CN493139   | 2                                                   | a    | ad   | bd   | ad   | bc   | bc   | ac   | ad   | acd  | bd   | bcd  | bcd  | ac   | ad   | ac   | bc   | ac   | bcd  | acd  | bd   |
| Hi02a07    | 2                                                   | a    | bc   | bd   | bd   | bc   | bd   | ac   | ad   | ac-  | bc   | c--  | c--  | ac   | bd   | ac   | bc   | ad   | c--  | c--  | ad   |
| CH02c02a_2 | 2                                                   | l    | ll   | lm   | lm   | lm   | lm   | ll   | ll   | lll  | ll   | lll  | llm  | ll   | lm   | ll   | lm   | ll   | llm  | lll  | ll   |
| CH03d10    | 2                                                   | l    | lm   | lm   | lm   | ll   | lm   | ll   | ll   | lll  | lm   | llm  | llm  | ll   | lm   | ll   | lm   | ll   | llm  | lll  | lm   |
| Hi05c06_3  | 2                                                   | n    | nn   | np   | np   | nn   | np   | nn   | np   | nnp  | np   | nnp  | nnp  | nn   | np   | nn   | nn   | nn   | nnp  | nnp  | np   |
| CH03e03    | 3                                                   | ac   | bd   | bd   | ad   | ad   | ac   | bd   | acd  | acd  | ac   | bcd  | bcd  | acd  | acd  | bd   | ad   | bd   | bc   | bcd  | acd  |
| CH03g07    | 3                                                   | bc   | bc   | ad   | ad   | ad   | bc   | bd   | acd  | acd  | ac   | bcd  | bcd  | acd  | acd  | bd   | ad   | bc   | ac   | bcd  | acd  |
| HGA8bY     | 3                                                   | bc   | bd   | bd   | bd   | ad   | bc   | bd   | bc-  | ac-  | bc   | ac-  | ac-  | bc-  | bc-  | bd   | ad   | bd   | bc   | bc-  | bc-  |
| Hi04c10x_1 | 3                                                   | bc   | ac   | bd   | bd   | bd   | ac   | ad   | ac-  | c--  | bc   | c--  | ac-  | c--  | c--  | ad   | bd   | ac   | bd   | c--  | ac-  |
| Hi07e08x   | 3                                                   | ad   | ac   | ac   | bc   | bc   | ad   | ac   | c--  | c--  | ad   | ac-  | ac-  | c--  | c--  | ac   | bc   | ac   | bd   | ac-  | c--  |
| AU223657   | 3                                                   | ll   | ll   | lm   | lm   | lm   | ll   | ll   | llm  | llm  | ll   | lll  | llm  | lll  | llm  | ll   | ll   | ll   | lm   | lll  | llm  |
| CH02c02b   | 4                                                   | bd   | ac   | bd   | ac   | ad   | bd   | bd   | acd  | acd  | ac   | bc   | bcd  | ad   | bc   | bd   | bcd  | ac   | bcd  | bcd  | acd  |
| CH05d02    | 4                                                   | ad   | bc   | bc   | ac   | bd   | bd   | bd   | bc-  | ac-  | bc   | bc   | --   | ad   | bd   | bd   | bc-  | bd   | bc-  | bc-  | bc-  |
| GD162      | 4                                                   | ad   | ac   | bc   | ac   | bd   | bd   | bd   | bcd  | acd  | ac   | bc   | bcd  | ad   | bd   | bd   | bcd  | bd   | bcd  | bcd  | bcd  |
| Hi04c10x_3 | 4                                                   | bd   | ac   | ac   | bd   | ad   | ad   | bd   | ac-  | c--  | bc   | ac   | c--  | bd   | ad   | ac   | ac-  | ad   | ac-  | ac-  | ac-  |
| CH04e02    | 4                                                   | ee   | eg   | ee   | fg   | ef   | ee   | ee   | eeg  | eef  | fg   | eg   | efg  | ef   | ef   | ee   | efg  | ee   | efg  | efg  | efg  |
| Hi07b02_4  | 4                                                   | fg   | ef   | fg   | ee   | eg   | fg   | fg   | efg  | eeg  | ee   | ef   | efg  | eg   | ef   | fg   | efg  | fg   | efg  | eeg  | efg  |
| CH03a04    | 5                                                   | ad   | ac   | ad   | ac   | acd  | bc   | ac   | bcd  | bd   | ad   | acd  | ad   | acd  | ac   | acd  | acd  | bcd  | ad   | bc   | ac   |
| CH04g09y   | 5                                                   | bd   | ad   | ac   | ac   | acd  | ac   | bc   | acd  | ad   | ad   | acd  | bc   | acd  | bd   | acd  | bcd  | bcd  | bd   | ac   | bc   |
| CH05e06    | 5                                                   | bc   | bd   | ac   | bd   | bcd  | bd   | ad   | acd  | bd   | bc   | bcd  | ad   | bcd  | ac   | bcd  | acd  | acd  | ac   | bd   | ad   |
| CH03a09    | 5                                                   | ef   | fg   | ef   | eg   | efg  | eg   | fg   | eeg  | ee   | ef   | eeg  | ef   | eeg  | fg   | efg  | efg  | efg  | ef   | eg   | fg   |
| CH04e03    | 5                                                   | ef   | fg   | eg   | fg   | efg  | fg   | eg   | eeg  | fg   | ef   | efg  | eg   | efg  | ee   | efg  | eeg  | eeg  | ee   | fg   | eg   |
| CH04h02_2  | 5                                                   | hk   | hk   | hh   | hk   | hhk  | hk   | k-   | hkk  | k-   | hk   | hhk  | hk   | hkk  | hk   | hhk  | hhk  | hkk  | hk   | hk   | k-   |

| Markers    | Aneuploid seedlings from the cross of 'Gala × Fuji' |      |      |      |       |       |      |      |       |      |       |       |      |       |       |       |      |       |       |      |       |
|------------|-----------------------------------------------------|------|------|------|-------|-------|------|------|-------|------|-------|-------|------|-------|-------|-------|------|-------|-------|------|-------|
|            | LG                                                  | GF01 | GF02 | GF03 | GF04  | GF05  | GF06 | GF07 | GF08  | GF09 | GF10  | GF11  | GF12 | GF13  | GF14  | GF15  | GF16 | GF17  | GF18  | GF19 | GF20  |
| CH04h02_4  | 5                                                   | kk   | h-   | h-   | h-    | hk-   | h-   | h-   | hk-   | h-   | kk    | hk-   | kk   | hk-   | h-    | hk-   | hk-  | hk-   | kk    | h-   | h-    |
| Hi04d02    | 5                                                   | hk   | hk   | hh   | hk    | hkk   | hk   | k-   | hhk   | k-   | hk    | hkk   | hk   | hhk   | hk    | hkk   | hhk  | hkk   | hk    | hk   | k-    |
| Hi11a03    | 5                                                   | hh   | hk   | hk   | hk    | hhk   | hk   | k-   | hkk   | hk   | k-    | hhk   | hk   | hkk   | hk    | hhk   | hkk  | hkk   | hk    | hk   | k-    |
| Hi21c08    | 5                                                   | hk   | kk   | hk   | hk    | hkk   | hk   | h-   | hhk   | hk   | h-    | hhk   | hk   | hkk   | hk    | hhk   | hkk  | hhk   | hk    | hk   | h-    |
| CH02a08z   | 5                                                   | nn   | np   | np   | np    | np1p2 | np   | np   | np1p2 | np   | nn    | np1p2 | np   | np1p2 | nn    | np1p2 | np   | np1p2 | nn    | np   | np    |
| CH03d07    | 6                                                   | bc   | ac   | ac   | bc    | bd    | ad   | bc   | bc    | ac   | ac    | bcd   | bcd  | acd   | bcd   | bcd   | bc   | acd   | bc    | bc   | bcd   |
| CH03d12    | 6                                                   | bd   | bd   | ad   | ad    | ac    | bc   | ad   | ad    | bd   | bd    | ac-   | ac-  | bc-   | ac-   | ac-   | ad   | bc-   | ad    | ad   | ac-   |
| Hi01d05    | 6                                                   | eg   | fg   | eg   | eg    | ee    | ef   | fg   | eg    | fg   | fg    | eeg   | eeg  | eeg   | eeg   | eeg   | eg   | efg   | eg    | eg   | eeg   |
| AJ000761   | 6                                                   | k-   | k-   | k-   | k-    | k-    | hh   | k-   | k-    | k-   | k-    | hk-   | hk-  | hk-   | hk-   | hk-   | k-   | hk-   | k-    | k-   | hk-   |
| CH03c01    | 6                                                   | h-   | h-   | h-   | h-    | kk    | kk   | h-   | h-    | h-   | h-    | hk-   | hk-  | hk-   | hk-   | hk-   | h-   | hk-   | h-    | h-   | hk-   |
| Hi04c10x_2 | 7                                                   | ad   | ad   | bc   | bc    | bd    | ac   | ac   | ac    | bc   | bc    | bc    | bc   | bc-   | bd    | ac    | ac   | ac    | ad    | ad   | bd    |
| CH05b06z_2 | 7                                                   | eg   | eg   | ef   | ef    | fg    | ee   | ef   | ee    | ef   | ef    | ef    | ef   | efg   | fg    | ee    | ee   | ee    | eg    | eg   | fg    |
| CH04e05    | 7                                                   | lm   | ll   | ll   | lm    | lm    | ll   | ll   | ll    | lm   | lm    | lm    | lm   | lll   | lm    | ll    | ll   | ll    | ll    | ll   | lm    |
| Hi05b09    | 7                                                   | lm   | lm   | ll   | ll    | ll    | lm   | lm   | lm    | ll   | ll    | ll    | ll   | lll   | ll    | lm    | lm   | lm    | lm    | lm   | ll    |
| CH01c06    | 8                                                   | ad   | bc   | ac   | bc    | ad    | ac   | bd   | bc    | bc   | bc    | ac    | ac   | bd    | bd    | ac    | bd   | bc    | ac    | bd   | bc    |
| Hi04b12    | 8                                                   | ad   | bd   | bc   | ad    | bc    | bd   | ac   | ad    | ad   | ad    | bd    | bd   | ac    | ac    | bd    | ac   | ad    | bd    | ac   | ad    |
| CH02g09    | 8                                                   | lm   | ll   | ll   | lm    | ll    | ll   | lm   | lm    | ll   | ll    | ll    | ll   | lm    | lm    | ll    | lm   | lm    | ll    | ll   | lm    |
| Hi04e05    | 8                                                   | lm   | lm   | ll   | ll    | lm    | lm   | ll   | ll    | lm   | lm    | lm    | lm   | ll    | ll    | lm    | ll   | ll    | lm    | lm   | ll    |
| Hi23g12    | 8                                                   | np   | np   | nn   | np    | nn    | np   | nn   | np    | np   | np    | np    | np   | nn    | nn    | np    | nn   | np    | np    | nn   | np    |
| CH01h02_2  | 9                                                   | ad   | bc   | bc   | ac-   | ad    | ad   | ac   | ad    | ac   | bc-   | bc    | ad   | ad    | ac-   | bc-   | bd   | bc-   | ac-   | ad   | ac-   |
| CH05c07    | 9                                                   | bc   | bc   | bc   | bcd   | bd    | ac   | ac   | ac    | bd   | ad    | bcd   | ad   | bd    | ac    | bcd   | bcd  | ac    | acd   | bcd  | bcd   |
| GD142      | 9                                                   | bd   | bd   | ac   | acd   | ac    | ac   | ad   | ac    | ad   | acd   | ad    | bd   | ad    | acd   | acd   | bc   | bcd   | acd   | ac   | acd   |
| Hi05e07    | 9                                                   | ad   | ad   | bc   | c--   | bc    | bc   | bd   | bc    | bd   | ac-   | bc    | ad   | bc    | c--   | ac-   | ac   | ac-   | c--   | bc   | c--   |
| NH029a     | 9                                                   | ac   | ac   | bd   | bcd   | bd    | bd   | bc   | bd    | bc   | acd   | bd    | ac   | bd    | bcd   | acd   | ad   | acd   | bcd   | bd   | bcd   |
| CH01h02_1  | 9                                                   | k-   | k-   | hh   | hhk   | hh    | hh   | k-   | hh    | k-   | hkk   | hh    | k-   | k-    | hkk   | hhk   | hk   | hkk   | hhk   | hh   | hkk   |
| Hi01d01    | 9                                                   | ll   | ll   | ll   | llm   | lm    | lm   | lm   | lm    | lm   | lll   | lm    | ll   | lm    | llm   | lll   | ll   | lll   | llm   | lm   | llm   |
| CH05d08y_2 | 9                                                   | nn   | nn   | np   | np1p2 | np    | np   | np   | np    | np   | np1p2 | nn    | nn   | np    | np1p2 | np1p2 | nn   | np1p2 | np1p2 | np   | np1p2 |
| CH01f07a   | 10                                                  | ac   | bc   | ad   | bd    | bd    | ac   | ac   | ad    | bd   | acd   | bd    | bd   | bd    | bcd   | ad    | acd  | acd   | bcd   | acd  | acd   |
| CH01f12    | 10                                                  | bd   | bc   | ac   | bd    | bd    | ad   | ad   | ad    | bd   | bcd   | ac    | ad   | bd    | bcd   | bd    | bcd  | acd   | bcd   | bcd  | acd   |
| CH02b03b   | 10                                                  | ad   | bc   | bd   | ac    | ac    | bd   | bd   | bc    | ac   | bc-   | ac    | ac   | ac    | ac-   | bc    | bc-  | bc-   | ac-   | bc-  | bc-   |
| CH02b07    | 10                                                  | ac   | bc   | bd   | bc    | ac    | ac   | bc   | ac    | bd   | bcd   | ac    | ad   | bc    | bcd   | bc    | bcd  | acd   | bcd   | bcd  | acd   |
| CH02c11    | 10                                                  | ad   | bc   | bd   | ac    | ac    | bc   | bc   | bc    | ac   | bc-   | ac    | ac   | ac    | ac-   | bc    | bc-  | bc-   | ac-   | bc-  | bc-   |
| MS06g03    | 10                                                  | ad   | ac   | bd   | ad    | bd    | bd   | ad   | bd    | ac   | ac-   | bc    | bd   | ad    | ac-   | ad    | ac-  | c--   | ac-   | ac-  | c--   |
| CH02a10    | 10                                                  | ll   | lm   | lm   | lm    | ll    | ll   | lm   | ll    | lm   | lll   | ll    | ll   | lm    | lll   | lm    | lll  | lll   | lll   | lll  | lll   |

| Markers    | LG | Aneuploid seedlings from the cross of 'Gala × Fuji' |      |      |      |      |      |      |      |      |      |      |      |      |      |      |      |      |      |      |      |
|------------|----|-----------------------------------------------------|------|------|------|------|------|------|------|------|------|------|------|------|------|------|------|------|------|------|------|
|            |    | GF01                                                | GF02 | GF03 | GF04 | GF05 | GF06 | GF07 | GF08 | GF09 | GF10 | GF11 | GF12 | GF13 | GF14 | GF15 | GF16 | GF17 | GF18 | GF19 | GF20 |
| CH03d11    | 10 | lm                                                  | lm   | ll   | lm   | ll   | ll   | lm   | ll   | lm   | llm  | ll   | ll   | lm   | llm  | lm   | llm  | llm  | llm  | llm  | llm  |
| CH04c06y_1 | 10 | ll                                                  | ll   | lm   | ll   | lm   | lm   | ll   | lm   | ll   | lll  | lm   | lm   | ll   | lll  | ll   | lll  | llm  | lll  | lll  | llm  |
| Hi02d04    | 10 | ll                                                  | ll   | ll   | ll   | lm   | ll   | lm   | ll   | ll   | llm  | lm   | lm   | lm   | lll  | lm   | llm  | llm  | lll  | lll  | lll  |
| Hi04f08    | 10 | nn                                                  | np   | nn   | nn   | nn   | nn   | nn   | nn   | nn   | nnp  | np   | np   | nn   | nnp  | nn   | nnp  | nnp  | nnp  | nnp  | nnp  |
| MS02a01    | 10 | np                                                  | nn   | np   | nn   | nn   | np   | np   | nn   | nn   | nnp  | nn   | nn   | nn   | nnp  | nn   | nnp  | nnp  | nnp  | nnp  | nnp  |
| CH02d08    | 11 | ac                                                  | bc   | bd   | ad   | ac   | ad   | ad   | bd   | bd   | ac   | ac   | acd  | bd   | ac   | bc   | ad   | bcd  | bd   | bc   | ad   |
| CH04g07    | 11 | ac                                                  | ac   | ad   | bd   | bc   | bd   | bc   | bd   | ad   | bc   | ac   | bcd  | bd   | bc   | ac   | bc   | bcd  | ad   | ad   | bd   |
| CH04h02_1  | 11 | bd                                                  | ad   | ac   | bc   | bd   | bc   | ac   | ac   | ac   | ad   | bd   | bc-  | ac   | bd   | ad   | bc   | ac-  | ac   | ad   | bc   |
| Hi06b06    | 11 | ad                                                  | ad   | ac   | bc   | bd   | bc   | bd   | bc   | ac   | bd   | ad   | acd  | bc   | bd   | ad   | bd   | bcd  | ac   | bc   | bc   |
| CH04h02_3  | 11 | nn                                                  | nn   | np   | np   | nn   | np   | np   | nn   | np   | nn   | nn   | nnp  | np   | nn   | nn   | np   | nnp  | np   | nn   | np   |
| CH01b12y   | 12 | bd                                                  | ad   | acd  | bd   | ad   | bcd  | bd   | bc   | ad   | acd  | ad   | bc   | ac   | bc   | acd  | bcd  | acd  | acd  | acd  | acd  |
| CH01g12    | 12 | bc                                                  | ac   | bcd  | ac   | bc   | acd  | ac   | ad   | bc   | bcd  | ad   | bc   | bd   | ad   | bcd  | acd  | bcd  | bcd  | bcd  | bcd  |
| NZ28f04    | 12 | bd                                                  | ad   | bcd  | ad   | bd   | acd  | ad   | ac   | bd   | bcd  | ac   | bd   | ac   | ac   | bcd  | acd  | bcd  | bcd  | bcd  | bcd  |
| CH01f02    | 12 | fg                                                  | eg   | eef  | fg   | ee   | eef  | fg   | ef   | fg   | efg  | eg   | ee   | ef   | ef   | efg  | eef  | efg  | efg  | eef  | eeg  |
| CH05d04    | 12 | ee                                                  | eg   | efg  | ee   | eg   | eef  | ee   | ef   | eg   | eef  | fg   | eg   | ef   | ef   | eeg  | efg  | efg  | eeg  | eef  | efg  |
| CH05d11    | 12 | ef                                                  | ee   | efg  | ee   | fg   | eeg  | ee   | eg   | ee   | efg  | fg   | ef   | eg   | eg   | efg  | eeg  | eeg  | efg  | eeg  | efg  |
| CH03h03z_2 | 12 | nn                                                  | nn   | nnp  | nn   | np   | nnp  | nn   | np   | nn   | nnp  | np   | nn   | np   | np   | nnp  | nnp  | nnp  | nnp  | nnp  | nnp  |
| CH03a08    | 13 | ad                                                  | ad   | bd   | ad   | ad   | bc   | bc   | ad   | ad   | bd   | bc   | bc   | bcd  | ad   | bcd  | ad   | acd  | acd  | bc   | bcd  |
| CH03h03z_1 | 13 | bd                                                  | bd   | ac   | bd   | bd   | ac   | ac   | ad   | bd   | ad   | ac   | ac   | ac-  | bd   | ac-  | bd   | c--  | c--  | ac   | ac-  |
| CH05c06_1  | 13 | ad                                                  | bc   | ac   | bc   | bc   | ad   | bc   | ad   | bc   | ad   | bc   | ac   | c--  | bc   | bc-  | ac   | bc-  | c--  | ac   | c--  |
| CH05f04    | 13 | bc                                                  | ac   | bd   | bd   | ac   | ac   | ac   | bd   | bd   | ac   | bc   | ac   | c--  | ac   | ac   | bc   | ac-  | c--  | bc   | c--  |
| CH05h05    | 13 | bd                                                  | ad   | bc   | ad   | ad   | bc   | ad   | bc   | bc   | ad   | bd   | ad   | bcd  | ad   | ac-  | bd   | acd  | bcd  | bd   | bcd  |
| Hi03e04    | 13 | bc                                                  | bc   | ac   | ac   | bc   | ad   | ad   | bc   | bc   | ac   | ad   | ad   | ac-  | ad   | ac-  | ad   | bc-  | bc-  | ad   | ac-  |
| Hi20b03    | 13 | ac                                                  | bd   | ad   | bd   | bd   | ac   | ad   | ad   | ad   | ac   | ac   | ac   | acd  | bd   | acd  | ad   | bcd  | bcd  | ac   | acd  |
| NH009b     | 13 | bc                                                  | ac   | bd   | ac   | ac   | bd   | bc   | bc   | bd   | bc   | bd   | bd   | bcd  | ac   | bcd  | bc   | acd  | acd  | bd   | bcd  |
| AU223486   | 13 | k-                                                  | k-   | hk   | k-   | k-   | hk   | hk   | k-   | k-   | hh   | hk   | hk   | hhk  | k-   | hkk  | k-   | hkk  | hhk  | hk   | hkk  |
| GD147      | 13 | k-                                                  | hh   | k-   | hh   | hh   | k-   | k-   | k-   | k-   | k-   | k-   | k-   | hkk  | hh   | hhk  | k-   | hhk  | hhk  | k-   | hkk  |
| Hi05c06_2  | 13 | h-                                                  | kk   | hk   | kk   | kk   | h-   | h-   | hk   | h-   | h-   | h-   | h-   | hhk  | kk   | hkk  | h-   | hhk  | hkk  | h-   | hhk  |
| Hi07b02_3  | 13 | ll                                                  | lm   | ll   | lm   | lm   | ll   | ll   | ll   | ll   | ll   | ll   | ll   | lll  | lm   | lll  | ll   | llm  | llm  | ll   | lll  |
| NZ03c01x_2 | 13 | lm                                                  | lm   | lm   | lm   | lm   | ll   | ll   | ll   | lm   | lm   | ll   | ll   | lll  | lm   | lll  | lm   | llm  | llm  | lm   | lll  |
| CH01g05    | 14 | ac                                                  | bc   | ad   | ac   | bc   | ad   | bcd  | ad   | ad   | bd   | bc   | bd   | bc   | ad   | acd  | ad   | bc   | bc   | bcd  | ad   |
| CH03a02    | 14 | ac                                                  | ad   | ac   | ac   | bc   | ac   | bcd  | ac   | bc   | ad   | bc   | ad   | bd   | ac   | acd  | bc   | bd   | bc   | bcd  | ac   |
| CH03d08    | 14 | bc                                                  | bd   | bd   | ad   | ad   | bc   | acd  | bc   | ac   | bc   | ac   | ad   | ad   | bc   | bcd  | bc   | ad   | ad   | acd  | bc   |
| CH05g07z_1 | 14 | hk                                                  | hk   | hk   | hk   | hk   | hk   | hhk  | k-   | k-   | hh   | hk   | hh   | k-   | k-   | hkk  | hk   | hk   | hk   | hhk  | k-   |

| Markers    | LG | Aneuploid seedlings from the cross of 'Gala × Fuji' |      |      |      |      |      |      |      |      |      |       |      |      |      |      |       |      |      |      |      |
|------------|----|-----------------------------------------------------|------|------|------|------|------|------|------|------|------|-------|------|------|------|------|-------|------|------|------|------|
|            |    | GF01                                                | GF02 | GF03 | GF04 | GF05 | GF06 | GF07 | GF08 | GF09 | GF10 | GF11  | GF12 | GF13 | GF14 | GF15 | GF16  | GF17 | GF18 | GF19 | GF20 |
| CH05g07z_2 | 14 | hk                                                  | hk   | hk   | hk   | hk   | hk   | hkh  | h-   | kk   | h-   | kk    | hk   | h-   | h-   | hkk  | hk    | hk   | hk   | hkh  | h-   |
| CH02c02a_1 | 15 | ad                                                  | ad   | ad   | bc   | bd   | ad   | bd   | ad   | ac   | bc   | ac-   | bc   | ac   | ac   | ac-  | bd    | bc   | ad   | ad   |      |
| CH02d11    | 15 | bc                                                  | ac   | bc   | bd   | ad   | bd   | ad   | bd   | bc   | bc   | acd   | ac   | bc   | bc   | bcd  | bd    | ac   | ad   | ac   |      |
| CH03b10    | 15 | ac                                                  | bc   | ac   | ad   | bd   | ad   | bd   | ad   | ac   | ac   | bcd   | bc   | ac   | ac   | ac   | acd   | ad   | bc   | bd   | bc   |
| Hi04c05    | 15 | ad                                                  | ac   | ad   | bd   | bc   | ac   | bc   | ac   | ad   | ad   | bc-   | bd   | ad   | ad   | ad   | ac-   | ac   | bd   | bc   | bd   |
| Hi06f09    | 15 | ad                                                  | bc   | bd   | ad   | ac   | bc   | ac   | bc   | bd   | ad   | bcd   | ad   | bd   | bd   | ad   | bcd   | ac   | ad   | bc   | bd   |
| NZ02b01    | 15 | ad                                                  | ac   | ad   | bd   | bc   | ac   | bc   | ac   | ad   | ad   | bc-   | bd   | ad   | ad   | ad   | ac-   | ac   | bd   | bc   | bd   |
| CH02c09    | 15 | lm                                                  | lm   | lm   | lm   | ll   | lm   | ll   | lm   | lm   | ll   | lll   | ll   | lm   | lm   | lm   | llm   | lm   | ll   | ll   | ll   |
| Hi02g06    | 15 | np                                                  | nn   | np   | nn   | nn   | nn   | nn   | np   | np   | np   | np1p2 | np   | np   | nn   | np   | np1p2 | nn   | np   | nn   | np   |
| CH02d10a   | 16 | bc                                                  | bc   | ac   | bd   | bd   | ad   | bc   | bd   | bc   | bc   | ac    | bc-  | bc-  | ac-  | bd   | ac-   | ad   | bd   | ad   | ac   |
| CH04f10    | 16 | bd                                                  | bd   | bd   | bc   | ad   | ac   | ac   | ac   | ad   | ad   | bd    | bc-  | bc-  | bc-  | ad   | bc-   | bc   | ad   | bc   | bd   |
| CH05a04    | 16 | bc                                                  | ac   | ac   | ad   | bd   | bd   | ad   | bd   | bc   | bc   | ac    | acd  | acd  | acd  | bc   | acd   | ad   | bd   | ad   | ac   |
| CH05c06_2  | 16 | bd                                                  | ad   | bd   | bd   | bd   | ad   | ad   | bd   | bd   | ac   | ad    | bcd  | acd  | acd  | ad   | acd   | bd   | bd   | ad   | ad   |
| Hi01d06y   | 16 | ad                                                  | ad   | ad   | ac   | bd   | bc   | bc   | bc   | bd   | bd   | ad    | acd  | acd  | acd  | bd   | acd   | ac   | bd   | ac   | ad   |
| Hi04e04    | 16 | ad                                                  | bc   | bd   | ac   | ac   | bc   | bc   | ac   | ad   | ad   | bd    | bcd  | bcd  | bcd  | ac   | bcd   | bc   | ac   | bc   | bd   |
| CH05b06z_1 | 16 | ef                                                  | ef   | ef   | ef   | ef   | ee   | ee   | ef   | eg   | ee   | ee    | eef  | efg  | eef  | ee   | efg   | ef   | ef   | ee   | ee   |
| Hi01c11x   | 16 | eg                                                  | eg   | eg   | eg   | eg   | fg   | fg   | eg   | fg   | ef   | fg    | eeg  | eeg  | efg  | fg   | efg   | eg   | eg   | fg   | fg   |
| CH01h01    | 17 | bd                                                  | b    | bc   | bd   | bd   | ac   | ac   | bd   | ad   | bd   | acd   | bd   | ac   | bcd  | bd   | acd   | ac   | bcd  | bcd  | bd   |
| CH04c06y_2 | 17 | bd                                                  | a    | ac   | ac   | ad   | ad   | bd   | bd   | ad   | ad   | c--   | bd   | ac   | bc-  | bd   | c--   | bc   | bc-  | c--  | ac   |
| CH05d08y_1 | 17 | bd                                                  | a    | bd   | ac   | bc   | bc   | ad   | ac   | bc   | bc   | c--   | ac   | bd   | ac-  | ac   | c--   | ad   | ac-  | c--  | bd   |
| CH05g03    | 17 | ad                                                  | a    | ac   | ad   | ad   | bc   | bc   | ad   | ad   | ad   | bcd   | ad   | bc   | acd  | ad   | bcd   | bc   | acd  | acd  | ad   |
| CH04c06y_3 | 17 | lm                                                  | m    | lm   | lm   | lm   | lm   | ll   | ll   | lm   | lm   | llm   | ll   | ll   | lll  | lm   | llm   | ll   | llm  | llm  | lm   |
| GD96       | 17 | lm                                                  | l    | lm   | lm   | ll   | lm   | ll   | lm   | ll   | lm   | lll   | ll   | ll   | lll  | ll   | lll   | ll   | lll  | lll  | lm   |
| Hi03c05    | 17 | ll                                                  | l    | ll   | ll   | lm   | ll   | lm   | ll   | ll   | lm   | llm   | lm   | lm   | lll  | lm   | llm   | lm   | lll  | lll  | ll   |
| Hi05c06_1  | 17 | ll                                                  | m    | ll   | lm   | lm   | ll   | lm   | lm   | ll   | ll   | lll   | lm   | ll   | llm  | lm   | lll   | lm   | llm  | lll  | ll   |
| Hi07b02_1  | 17 | lm                                                  | l    | lm   | ll   | lm   | ll   | lm   | ll   | lm   | ll   | llm   | ll   | lm   | lll  | lm   | lll   | lm   | lll  | llm  | ll   |
| Hi07b02_2  | 17 | np                                                  | n    | nn   | np   | np   | nn   | np   | nn   | nn   | np   | nnp   | nn   | nn   | nnp  | np   | nnp   | np   | nnp  | nnp  | nn   |

| Markers    | LG | Aneuploid seedlings from the cross of 'Gala × Fuji' |      |      |      |      |      |      |      |      |      |      |      |      |      |      |      |      |      |      |      |
|------------|----|-----------------------------------------------------|------|------|------|------|------|------|------|------|------|------|------|------|------|------|------|------|------|------|------|
|            |    | GF21                                                | GF22 | GF23 | GF24 | GF25 | GF26 | GF27 | GF28 | GF29 | GF30 | GF31 | GF32 | GF33 | GF34 | GF35 | GF36 | GF37 | GF38 | GF39 | GF40 |
| CH05g08    | 1  | ac                                                  | bd   | bc   | bd   | ac   | bd   | ad   | ad   | bd   | bd   | bd   | bd   | ad   | bd   | bd   | bd   | ad   | bd   | bc   | ac   |
| Hi07d08    | 1  | bd                                                  | ac   | bc   | ac   | ad   | ac   | bc   | bc   | ac   | ac   | ac   | ac   | bc   | ac   | ac   | ac   | ad   | bd   | bc   | ac   |
| Hi12c02    | 1  | bc                                                  | bc   | ac   | ad   | ac   | ad   | bd   | ad   | ad   | ad   | ad   | bd   | ac   | ad   | ad   | ad   | ad   | bc   | ad   | ad   |
| KA4B       | 1  | h-                                                  | h-   | h-   | kk   | hk   | kk   | h-   | kk   | kk   | kk   | h-   | h-   | h-   | kk   | kk   | kk   | kk   | h-   | kk   | kk   |
| Hi02c07    | 1  | lm                                                  | lm   | lm   | lm   | lm   | ll   | lm   | ll   | ll   | ll   | lm   | lm   | lm   | ll   | ll   | ll   | ll   | lm   | ll   | lm   |
| Hi02b10    | 1  | np                                                  | np   | np   | np   | np   | nn   | np   | nn   | nn   | nn   | np   | np   | np   | nn   | nn   | nn   | nn   | np   | nn   | np   |
| CH02a04z   | 2  | bcd                                                 | ad   | ac   | ad   | acd  | bcd  | acd  | bcd  | bd   | ac   | ad   | acd  | acd  | acd  | acd  | acd  | bcd  | bcd  | acd  | bcd  |
| CH02c02a_3 | 2  | bc-                                                 | ac   | ad   | ac   | ac-  | ac-  | bc-  | bc-  | bc   | ad   | ac   | ac-  | bc-  | ac-  | ac-  | ac-  | ac-  | bc-  | bc-  | ac-  |
| CH02c06    | 2  | bcd                                                 | ac   | ad   | ac   | acd  | bcd  | acd  | bcd  | bc   | ad   | ac   | bcd  | bcd  | bcd  | acd  | bcd  | acd  | bcd  | acd  | bcd  |
| CH03d01    | 2  | ac-                                                 | bd   | bc   | bd   | c--  | ac-  | ac-  | ac-  | ad   | bc   | bd   | c--  | c--  | c--  | c--  | ac-  | ac-  | ac-  | c--  | ac-  |
| CH05e03    | 2  | acd                                                 | bc   | bd   | bc   | bcd  | acd  | bcd  | acd  | ac   | bd   | bc   | bcd  | bcd  | bcd  | bcd  | acd  | acd  | acd  | bcd  | acd  |
| CN493139   | 2  | bcd                                                 | bc   | ad   | bc   | acd  | bcd  | acd  | bcd  | ac   | ad   | bc   | bcd  | bcd  | acd  | bcd  | acd  | acd  | bcd  | bcd  | bcd  |
| Hi02a07    | 2  | ac-                                                 | ac   | ad   | ac   | ac-  | c--  | ac-  | c--  | ac   | ad   | ac   | ac-  | ac-  | ac-  | c--  | c--  | c--  | c--  | ac-  | c--  |
| CH02c02a_2 | 2  | llm                                                 | ll   | ll   | ll   | lll  | llm  | lll  | lll  | ll   | ll   | ll   | llm  | llm  | lll  | llm  | lll  | lll  | llm  | llm  | lll  |
| CH03d10    | 2  | llm                                                 | ll   | ll   | ll   | lll  | llm  | lll  | llm  | ll   | ll   | ll   | llm  | llm  | lll  | llm  | lll  | lll  | llm  | llm  | llm  |
| Hi05c06_3  | 2  | nnp                                                 | nn   | np   | nn   | nnp  | nnp  | nnp  | nnp  | nn   | np   | nn   | nnp  | nnp  | nnp  | nnp  | nnp  | nnp  | nnp  | nnp  | nnp  |
| CH03e03    | 3  | ad                                                  | bcd  | acd  | acd  | bc   | bc   | acd  | ac   | ad   | ad   | bcd  | acd  | ac   | ac   | acd  | bcd  | ad   | bcd  | bcd  | bd   |
| CH03g07    | 3  | ad                                                  | bcd  | bcd  | acd  | bd   | bc   | acd  | bc   | ad   | ad   | bcd  | bcd  | ac   | bc   | acd  | acd  | ad   | bcd  | bcd  | bd   |
| HGA8bY     | 3  | bd                                                  | ac-  | bc-  | bc-  | ac   | ac   | bc-  | bc   | ad   | ad   | ac-  | bc-  | bc   | bc   | bc-  | bc-  | ad   | bc-  | ac-  | ac   |
| Hi04c10x_1 | 3  | bd                                                  | c--  | ac-  | c--  | ad   | ac   | c--  | ac   | bd   | bd   | ac-  | ac-  | ac   | ac   | c--  | c--  | bd   | ac-  | ac-  | ad   |
| Hi07e08x   | 3  | bc                                                  | ac-  | c--  | c--  | bd   | bd   | c--  | ad   | bc   | bc   | ac-  | c--  | ad   | ad   | c--  | ac-  | bc   | ac-  | ac-  | ac   |
| AU223657   | 3  | ll                                                  | lll  | llm  | llm  | lm   | lm   | lll  | ll   | lm   | lm   | llm  | lll  | lm   | ll   | lll  | lll  | ll   | llm  | llm  | ll   |
| CH02c02b   | 4  | ad                                                  | ac   | acd  | acd  | ad   | bcd  | acd  | bcd  | acd  | ad   | acd  | acd  | bc   | ad   | bcd  | bcd  | bcd  | bcd  | ad   | bcd  |
| CH05d02    | 4  | ad                                                  | bd   | ac-  | ac-  | bc   | ac-  | ac-  | bc-  | ac-  | --   | bc-  | bc-  | bc   | bd   | ac-  | bc-  | bc-  | bc-  | ad   | ac-  |
| GD162      | 4  | ad                                                  | bd   | acd  | acd  | bc   | acd  | acd  | bcd  | acd  | bd   | bcd  | bcd  | bc   | bd   | acd  | bcd  | bcd  | bcd  | ad   | acd  |
| Hi04c10x_3 | 4  | bd                                                  | ad   | c--  | c--  | ac   | c--  | c--  | ac-  | c--  | ad   | ac-  | ac-  | ac   | ad   | c--  | ac-  | ac-  | ac-  | bd   | c--  |
| CH04e02    | 4  | ef                                                  | fg   | eef  | eef  | eg   | eef  | eef  | efg  | eef  | ee   | efg  | efg  | eg   | ef   | eef  | efg  | efg  | eef  | ef   | eef  |
| Hi07b02_4  | 4  | eg                                                  | ee   | eeg  | eeg  | ef   | eeg  | eeg  | efg  | eeg  | fg   | efg  | efg  | ef   | eg   | eeg  | efg  | efg  | eeg  | eg   | eeg  |
| CH03a04    | 5  | ad                                                  | acd  | acd  | acd  | acd  | bcd  | bc   | acd  | ad   | acd  | acd  | acd  | bc   | ad   | bcd  | acd  | ad   | bcd  | acd  | bcd  |
| CH04g09y   | 5  | bd                                                  | bcd  | bcd  | bcd  | bcd  | acd  | ac   | bcd  | bd   | bcd  | bcd  | acd  | bd   | bd   | bcd  | acd  | ad   | acd  | bcd  | acd  |
| CH05e06    | 5  | ac                                                  | acd  | acd  | acd  | acd  | acd  | bd   | acd  | ac   | acd  | bd   | bcd  | bd   | ac   | acd  | acd  | ac   | bcd  | acd  | bcd  |
| CH03a09    | 5  | ef                                                  | efg  | efg  | efg  | efg  | eeg  | eg   | efg  | ef   | efg  | efg  | eeg  | eg   | ef   | eeg  | eeg  | ef   | eeg  | efg  | eeg  |
| CH04e03    | 5  | ee                                                  | eeg  | eeg  | eeg  | eeg  | eeg  | fg   | eeg  | eg   | eeg  | efg  | efg  | fg   | ee   | eeg  | eeg  | ee   | efg  | eeg  | efg  |
| CH04h02_2  | 5  | k-                                                  | hkk  | hkk  | hkk  | hkk  | hkk  | hh   | hkk  | k-   | hkk  | hkk  | hkk  | hk   | hk   | hkk  | hkk  | hk   | hkk  | hk-  | hk-  |



| Markers    | Aneuploid seedlings from the cross of 'Gala × Fuji' |      |      |      |      |      |      |      |      |      |      |      |      |      |      |      |      |      |      |      |      |
|------------|-----------------------------------------------------|------|------|------|------|------|------|------|------|------|------|------|------|------|------|------|------|------|------|------|------|
|            | LG                                                  | GF21 | GF22 | GF23 | GF24 | GF25 | GF26 | GF27 | GF28 | GF29 | GF30 | GF31 | GF32 | GF33 | GF34 | GF35 | GF36 | GF37 | GF38 | GF39 | GF40 |
| CH03d11    | 10                                                  | llm  | llm  | ll   | llm  | lm   | llm  | llm  | ll   | llm  | llm  | lm   | lm   | llm  | llm  | llm  | llm  | llm  | llm  | llm  | llm  |
| CH04c06y_1 | 10                                                  | llm  | llm  | lm   | llm  | llm  | llm  | lll  | lm   | llm  | llm  | ll   | lm   | llm  | lll  | llm  | lll  | llm  | lll  | llm  | llm  |
| Hi02d04    | 10                                                  | lll  | lll  | lm   | lll  | lll  | lll  | llm  | lm   | llm  | lll  | lm   | lm   | llm  | lll  | lll  | lll  | llm  | llm  | lll  | lll  |
| Hi04f08    | 10                                                  | nnp  | nnp  | np   | nnp  | nnp  | nnp  | nnp  | np   | nnp  | nnp  | nn   | nn   | nnp  | nnp  | nnp  | nnp  | nnp  | nnp  | nnp  | nnp  |
| MS02a01    | 10                                                  | nnp  | nnp  | nn   | nnp  | nnp  | nnp  | nnp  | nn   | nnp  | nnp  | nn   | np   | nnp  | nnp  | nnp  | nnp  | nnp  | nnp  | nnp  | nnp  |
| CH02d08    | 11                                                  | ad   | ac   | ac   | ad   | bcd  | ac   | bcd  | ad   | bd   | acd  | bd   | acd  | ad   | ac   | ad   | acd  | acd  | ad   | bc   | ad   |
| CH04g07    | 11                                                  | bd   | ac   | ad   | bc   | acd  | bd   | bcd  | ad   | ad   | bcd  | ad   | bcd  | ad   | bc   | bc   | bcd  | acd  | bd   | ac   | bd   |
| CH04h02_1  | 11                                                  | ac   | bd   | bd   | bc   | ac-  | bd   | ac-  | bc   | ac   | bc-  | ad   | ac-  | bc   | bd   | bc   | bc-  | bc-  | bc   | ad   | bc   |
| Hi06b06    | 11                                                  | bc   | ad   | ac   | bd   | acd  | bc   | bcd  | ac   | ac   | bcd  | ac   | bcd  | ac   | bd   | bd   | bcd  | acd  | bd   | ad   | bc   |
| CH04h02_3  | 11                                                  | np   | nn   | nn   | np   | nnp  | np   | nnp  | np   | nn   | nnp  | np   | nnp  | np   | nn   | np   | nnp  | nnp  | np   | nn   | np   |
| CH01b12y   | 12                                                  | acd  | acd  | ad   | bcd  | acd  | ac   | bc   | bc   | acd  | acd  | bcd  | bcd  | bc   | ad   | bc   | acd  | acd  | acd  | bcd  | bcd  |
| CH01g12    | 12                                                  | bcd  | bcd  | bc   | acd  | bcd  | bd   | ad   | ad   | bcd  | bcd  | acd  | acd  | ad   | bc   | ad   | bcd  | bcd  | bcd  | acd  | acd  |
| NZ28f04    | 12                                                  | bcd  | acd  | bd   | acd  | bcd  | bc   | ad   | ac   | bcd  | bcd  | acd  | acd  | ac   | bd   | ac   | bcd  | bcd  | bcd  | acd  | acd  |
| CH01f02    | 12                                                  | efg  | eef  | eg   | eeg  | efg  | ee   | fg   | ef   | efg  | efg  | eef  | efg  | fg   | eg   | ef   | efg  | eef  | efg  | eef  | eef  |
| CH05d04    | 12                                                  | eef  | eef  | eg   | efg  | eef  | fg   | ee   | ef   | eeg  | efg  | efg  | efg  | ee   | eg   | ef   | efg  | efg  | eeg  | eef  | eef  |
| CH05d11    | 12                                                  | efg  | eeg  | ef   | efg  | efg  | fg   | ee   | eg   | efg  | efg  | eeg  | efg  | ee   | ef   | eg   | efg  | eeg  | efg  | eeg  | eeg  |
| CH03h03z_2 | 12                                                  | nnp  | nnp  | nn   | nnp  | nnp  | np   | nn   | np   | nnp  | nnp  | nnp  | nnp  | np   | nn   | np   | nnp  | nnp  | nnp  | nnp  | nnp  |
| CH03a08    | 13                                                  | ac   | ad   | ac   | bcd  | bd   | ac   | ac   | bcd  | acd  | ac   | bcd  | acd  | acd  | bcd  | ac   | acd  | acd  | ac   | acd  | acd  |
| CH03h03z_1 | 13                                                  | bc   | bd   | bc   | ac-  | ad   | bc   | bc   | ac-  | c--  | bc   | ac-  | c--  | c--  | ac-  | bc   | c--  | c--  | bc   | c--  | c--  |
| CH05c06_1  | 13                                                  | bd   | ac   | bd   | bc-  | bc   | ad   | ad   | c--  | c--  | bd   | c--  | c--  | bc-  | bc-  | ac   | bc-  | c--  | bd   | bc-  | bc-  |
| CH05f04    | 13                                                  | ad   | bc   | ad   | ac-  | ac   | bd   | bd   | c--  | c--  | ad   | c--  | c--  | ac-  | ac-  | bc   | ac-  | c--  | ad   | ac-  | ac-  |
| CH05h05    | 13                                                  | ac   | bd   | ac   | acd  | ad   | bc   | bc   | bcd  | bcd  | ac   | bcd  | bcd  | acd  | acd  | bd   | acd  | bcd  | ac   | acd  | acd  |
| Hi03e04    | 13                                                  | bd   | ac   | bd   | bc-  | ac   | bd   | bd   | ac-  | bc-  | ac   | bc-  | bc-  | ac-  | bc-  | bd   | bc-  | ac-  | bd   | bc-  | bc-  |
| Hi20b03    | 13                                                  | bc   | ad   | bc   | acd  | ad   | bc   | ac   | acd  | bcd  | bc   | acd  | bcd  | bcd  | acd  | bd   | bcd  | bcd  | bc   | bcd  | bcd  |
| NH009b     | 13                                                  | ad   | bc   | ad   | bcd  | bc   | ad   | bd   | bcd  | acd  | ad   | bcd  | acd  | acd  | bcd  | ac   | acd  | acd  | ad   | acd  | acd  |
| AU223486   | 13                                                  | k-   | k-   | k-   | hhk  | hh   | k-   | k-   | hkk  | hhk  | k-   | hhk  | hhk  | hkk  | hkk  | k-   | hkk  | hhk  | k-   | hk-  | hk-  |
| GD147      | 13                                                  | hk   | k-   | hk   | hkk  | hk   | hk   | k-   | hkk  | hhk  | hk   | hkk  | hhk  | hhk  | hkk  | hh   | hkk  | hkk  | hk   | hk-  | hk-  |
| Hi05c06_2  | 13                                                  | hk   | h-   | hk   | hkk  | hk   | hk   | h-   | hhk  | hkk  | hk   | hhk  | hkk  | hkk  | hhk  | kk   | hkk  | hhk  | hk   | hk-  | hk-  |
| Hi07b02_3  | 13                                                  | lm   | ll   | lm   | lll  | ll   | lm   | ll   | lll  | llm  | lm   | lll  | lll  | lll  | lll  | llm  | llm  | llm  | lm   | llm  | llm  |
| NZ03c01x_2 | 13                                                  | ll   | lm   | ll   | lll  | ll   | lm   | ll   | lll  | llm  | lm   | lll  | lll  | lll  | lll  | ll   | llm  | llm  | lm   | llm  | llm  |
| CH01g05    | 14                                                  | bc   | bcd  | acd  | bd   | ac   | ad   | bc   | bc   | ac   | bd   | ac   | bcd  | acd  | acd  | bd   | bd   | ad   | acd  | bcd  | ad   |
| CH03a02    | 14                                                  | bd   | bcd  | acd  | bd   | bc   | ac   | bd   | bd   | ad   | bc   | ad   | bcd  | acd  | acd  | bc   | bc   | ac   | acd  | bcd  | ad   |
| CH03d08    | 14                                                  | ad   | acd  | bcd  | ac   | bd   | bc   | ad   | ad   | bd   | ac   | bd   | acd  | bcd  | bcd  | ac   | ac   | bc   | bcd  | acd  | bc   |
| CH05g07z_1 | 14                                                  | k-   | hkk  | hkk  | k-   | hk   | k-   | hk   | k-   | k-   | hh   | k-   | hkk  | hhk  | hkk  | hh   | hh   | k-   | hkk  | hk-  | k-   |

| Markers    | LG | Aneuploid seedlings from the cross of 'Gala × Fuji' |      |       |      |       |       |      |      |       |       |       |      |       |       |      |      |       |      |       |       |
|------------|----|-----------------------------------------------------|------|-------|------|-------|-------|------|------|-------|-------|-------|------|-------|-------|------|------|-------|------|-------|-------|
|            |    | GF21                                                | GF22 | GF23  | GF24 | GF25  | GF26  | GF27 | GF28 | GF29  | GF30  | GF31  | GF32 | GF33  | GF34  | GF35 | GF36 | GF37  | GF38 | GF39  | GF40  |
| CH05g07z_2 | 14 | h-                                                  | hkk  | hhk   | h-   | hk    | h-    | hk   | h-   | h-    | kk    | h-    | hhk  | hhk   | hkk   | kk   | kk   | h-    | hkk  | hk-   | h-    |
| CH02c02a_1 | 15 | bc                                                  | bc   | ac-   | bd   | ac-   | bc-   | ad   | ac   | ac-   | bc-   | ac-   | bd   | ac-   | bc-   | ad   | ac   | ac-   | ad   | bc-   | ac-   |
| CH02d11    | 15 | ac                                                  | ac   | bcd   | ad   | ac-   | ac-   | bd   | ac   | acd   | acd   | acd   | ac   | acd   | acd   | bc   | bc   | acd   | bd   | acd   | bcd   |
| CH03b10    | 15 | bc                                                  | bd   | acd   | bd   | bcd   | bcd   | ad   | bc   | bcd   | bcd   | bcd   | bc   | bcd   | bcd   | ac   | ac   | bcd   | ac   | bcd   | acd   |
| Hi04c05    | 15 | bd                                                  | bd   | ac-   | bc   | bc-   | bc-   | ac   | bd   | bc-   | bc-   | bc-   | bc   | bc-   | bc-   | ad   | ad   | bc-   | ac   | bc-   | ac-   |
| Hi06f09    | 15 | ad                                                  | ad   | acd   | ac   | acd   | acd   | bc   | bd   | bcd   | acd   | acd   | ad   | acd   | ad    | bd   | bd   | bcd   | bc   | acd   | bcd   |
| NZ02b01    | 15 | bd                                                  | bd   | ac-   | bc   | bc-   | bc-   | ac   | bd   | bc-   | bc-   | bc-   | bc   | bc-   | bc-   | ad   | ad   | bc-   | ac   | bc-   | ac-   |
| CH02c09    | 15 | ll                                                  | ll   | llm   | ll   | lll   | lll   | llm  | ll   | lll   | llm   | lll   | ll   | llm   | lll   | llm  | llm  | lll   | llm  | lll   | llm   |
| Hi02g06    | 15 | nn                                                  | np   | np1p2 | nn   | np1p2 | np1p2 | nn   | np   | np1p2 | np1p2 | np1p2 | nn   | np1p2 | np1p2 | np   | np   | np1p2 | nn   | np1p2 | np1p2 |
| CH02d10a   | 16 | ad-                                                 | ac   | bc-   | ad   | bc-   | bc-   | ac-  | ac-  | bc-   | bc-   | ac-   | ac-  | ac-   | bc-   | ac-  | bc   | bc-   | bc-  | ac-   | ac-   |
| CH04f10    | 16 | ac-                                                 | bc   | bc-   | ad   | bc-   | ac-   | ac-  | bc-  | ac-   | bc-   | ac-   | bc-  | bc-   | ac-   | bc-  | ac   | ac-   | ac-  | bc-   | ac-   |
| CH05a04    | 16 | bcd                                                 | ad   | acd   | bc   | acd   | bcd   | bcd  | acd  | bcd   | acd   | bcd   | bcd  | acd   | bcd   | acd  | bd   | acd   | bcd  | acd   | bcd   |
| CH05c06_2  | 16 | bcd                                                 | bd   | acd   | bc   | acd   | bcd   | bcd  | acd  | bcd   | acd   | bcd   | bcd  | acd   | bcd   | bcd  | bc   | acd   | bcd  | bcd   | bcd   |
| Hi01d06y   | 16 | bcd                                                 | ac   | acd   | bd   | acd   | bcd   | bcd  | acd  | bcd   | acd   | bcd   | acd  | acd   | bcd   | ad   | bc   | bcd   | bcd  | acd   | bcd   |
| Hi04e04    | 16 | acd                                                 | ac   | bcd   | ad   | bcd   | acd   | acd  | bcd  | acd   | bcd   | acd   | bcd  | acd   | acd   | ad   | bcd  | acd   | bcd  | acd   | acd   |
| CH05b06z_1 | 16 | efg                                                 | ef   | efg   | fg   | eef   | efg   | eef  | eef  | eeg   | efg   | eef   | eef  | efg   | efg   | eef  | fg   | eef   | efg  | eef   | eef   |
| Hi01c11x   | 16 | efg                                                 | eg   | efg   | ee   | eeg   | eeg   | eeg  | eeg  | efg   | efg   | eeg   | eeg  | efg   | eeg   | efg  | ee   | efg   | efg  | eeg   | eeg   |
| CH01h01    | 17 | bcd                                                 | bcd  | acd   | bd   | acd   | bcd   | bcd  | acd  | acd   | acd   | acd   | ac   | bcd   | bcd   | bcd  | bc   | acd   | acd  | ad    | bcd   |
| CH04c06y_2 | 17 | bc-                                                 | bc-  | c--   | ad   | c--   | bc-   | bc-  | bc-  | bc-   | c--   | c--   | bd   | bc-   | bc-   | c--  | ad   | c--   | c--  | c--   | bc-   |
| CH05d08y_1 | 17 | ac-                                                 | ac-  | c--   | bc   | c--   | ac-   | ac-  | ac-  | ac-   | c--   | c--   | ad   | ac-   | ac-   | c--  | bc   | c--   | c--  | c--   | ac-   |
| CH05g03    | 17 | acd                                                 | acd  | bcd   | ad   | bcd   | acd   | acd  | bcd  | bcd   | acd   | bcd   | bc   | acd   | acd   | ac   | ac   | bcd   | bcd  | bcd   | acd   |
| CH04c06y_3 | 17 | llm                                                 | lll  | llm   | llm  | llm   | lll   | lll  | llm  | lll   | llm   | llm   | llm  | llm   | llm   | ll   | llm  | llm   | llm  | llm   | llm   |
| GD96       | 17 | lll                                                 | lll  | lll   | llm  | lll   | lll   | lll  | lll  | lll   | lll   | ll    | lll  | lll   | lll   | llm  | lll  | lll   | lll  | lll   | lll   |
| Hi03c05    | 17 | lll                                                 | lll  | llm   | ll   | lll   | lll   | llm  | llm  | llm   | lll   | llm   | llm  | lll   | lll   | ll   | llm  | llm   | lll  | lll   | lll   |
| Hi05c06_1  | 17 | llm                                                 | llm  | lll   | llm  | lll   | llm   | llm  | llm  | llm   | lll   | lll   | llm  | llm   | llm   | lll  | ll   | lll   | lll  | lll   | llm   |
| Hi07b02_1  | 17 | llm                                                 | lll  | llm   | ll   | llm   | lll   | llm  | lll  | llm   | lll   | llm   | llm  | llm   | llm   | llm  | llm  | llm   | llm  | lll   | lll   |
| Hi07b02_2  | 17 | nnp                                                 | nnp  | nnp   | nn   | nnp   | nnp   | nnp  | nnp  | nnp   | nnp   | nnp   | np   | nnp   | nnp   | nnp  | np   | nnp   | nnp  | nnp   | nnp   |

Note: '-' represents a null allele, or missing data; 'p1' and 'p2' are con-dominant alleles.
