# Supplementary material for: Molecular Genetic Features of Polyploidization and Aneuploidization Reveal Unique Patterns for Genome Duplication in Diploid Malus
Source: PubMed Central journal article supplement (PMC3254611; doi:10.1371/journal.pone.0029449), 2012-01-10
Supplement: pone.0029449.s003.pdf [file pone.0029449.s003.pdf]

| Markers    | LG | Aneuploid seedlings from the cross of 'Fuji × Gala' |      |      |      |      |      |      |      |      |       |      |       |       |       |       |       |      |       |       |
|------------|----|-----------------------------------------------------|------|------|------|------|------|------|------|------|-------|------|-------|-------|-------|-------|-------|------|-------|-------|
|            |    | FG01                                                | FG02 | FG03 | FG04 | FG05 | FG06 | FG07 | FG08 | FG09 | FG10  | FG11 | FG12  | FG13  | FG14  | FG15  | FG16  | FG17 | FG18  | FG19  |
| CH05g08    | 1  | ad                                                  | bd   | ad   | bd   | bd   | ac   | bd   | bc   | bc   | bd    | ad   | bc    | ad    | bd    | ac    | ad    | ac   | ac    | bc    |
| Hi07d08    | 1  | bc                                                  | ac   | bc   | ac   | ac   | bc   | ac   | ad   | ad   | ac    | bc   | ad    | bc    | ac    | bd    | bc    | bd   | bd    | bc    |
| Hi12c02    | 1  | ad                                                  | ad   | bd   | ad   | ad   | bc   | ad   | bc   | ad   | ad    | bc   | ad    | ad    | bc    | ad    | bc    | bc   | bc    | bd    |
| KA4B       | 1  | h-                                                  | kk   | h-   | h-   | kk   | h-   | kk   | h-   | kk   | kk    | h-   | kk    | kk    | h-    | h-    | h-    | h-   | h-    | h-    |
| Hi02b10    | 1  | ll                                                  | lm   | ll   | ll   | lm   | lm   | lm   | ll   | ll   | lm    | ll   | ll    | lm    | ll    | ll    | ll    | lm   | lm    | ll    |
| Hi02c07    | 1  | nn                                                  | np   | nn   | nn   | np   | np   | np   | nn   | nn   | np    | nn   | nn    | np    | nn    | nn    | nn    | np   | np    | nn    |
| CH02a04z   | 2  | ad                                                  | bc   | ad   | ac   | ad   | ac   | ad   | ac   | ad   | bcd   | ac   | acd   | bcd   | acd   | acd   | ad    | ac   | bcd   | bd    |
| CH02c02a_3 | 2  | ac                                                  | bc   | ac   | ad   | ad   | ad   | ac   | ad   | ac   | acd   | bc   | acd   | bcd   | acd   | bcd   | ac    | ac   | bcd   | bc    |
| CH02c06    | 2  | ac                                                  | ac   | bc   | bd   | ac   | bd   | ac   | bd   | ac   | bcd   | ad   | acd   | bcd   | bcd   | acd   | ac    | bd   | bcd   | bc    |
| CH03d01    | 2  | bd                                                  | bc   | ad   | ac   | bd   | ac   | bd   | ac   | bd   | ac-   | bc   | c--   | ac-   | c--   | c--   | bd    | ad   | ac-   | ad    |
| CH05e03    | 2  | bc                                                  | bd   | bc   | ad   | bc   | bd   | bc   | bc   | bc   | acd   | bd   | bcd   | acd   | bcd   | bcd   | bc    | bc   | acd   | ac    |
| CN493139   | 2  | bc                                                  | bd   | bc   | ac   | ad   | ad   | ad   | ac   | bc   | ac-   | bd   | bc-   | ac-   | bc-   | ac-   | ad    | bc   | bc-   | ac    |
| Hi02a07    | 2  | ac                                                  | ad   | ac   | bd   | ac   | ad   | ac   | ac   | bc   | c--   | ad   | ac-   | c--   | ac-   | ac-   | ac    | ac   | c--   | bc    |
| Hi05c06_3  | 2  | lm                                                  | ll   | lm   | ll   | lm   | ll   | lm   | lm   | lm   | llm   | lm   | lll   | lll   | llm   | lll   | lm    | lm   | llm   | lm    |
| CH02c02a_2 | 2  | nn                                                  | nn   | nn   | np   | nn   | nn   | nn   | nn   | np   | np1p2 | nn   | np1p2 | np1p2 | np1p2 | np1p2 | nn    | nn   | np1p2 | np    |
| CH03d10    | 2  | nn                                                  | nn   | nn   | np   | nn   | nn   | nn   | nn   | np   | np1p2 | nn   | np1p2 | np1p2 | np1p2 | np1p2 | nn    | nn   | np1p2 | np    |
| CH03e03    | 3  | bd                                                  | bd   | ad   | ad   | ad   | bc   | ac   | ac   | ad   | bc    | bd   | bd    | bc-   | bc    | ad    | bc-   | bc   | bc-   | ac-   |
| CH03g07    | 3  | ad                                                  | ad   | bc   | bd   | ad   | ac   | ac   | ac   | bc   | bc    | ad   | bc    | bcd   | bc    | ad    | acd   | bc   | bcd   | acd   |
| HGA8bY     | 3  | ad                                                  | bd   | bd   | bd   | ad   | bc   | ac   | ac   | ad   | bc    | bc   | ad    | bcd   | bc    | ad    | bcd   | ac   | bcd   | bcd   |
| Hi04c10x_1 | 3  | bd                                                  | bd   | ac   | bd   | bd   | bc   | bd   | bc   | ac   | ac    | bd   | ac    | ac-   | bc    | bd    | c--   | ac   | ac-   | c--   |
| Hi07e08x   | 3  | bc                                                  | bc   | ac   | ac   | bc   | ad   | bd   | bd   | bc   | ad    | ad   | ac    | ac-   | ad    | bc    | ac-   | ad   | ac-   | c--   |
| AU223657   | 3  | np                                                  | np   | nn   | np   | np   | nn   | np   | np   | np   | nn    | nn   | nn    | np1p2 | ad    | bc    | np1p2 | nn   | np1p2 | np1p2 |
| CH02c02b   | 4  | ac                                                  | ac   | bd   | ad   | ac   | bc   | acd  | ac   | bcd  | ad    | ad   | acd   | bcd   | acd   | ad    | ac    | acd  | bc    | bcd   |
| CH05d02    | 4  | ac                                                  | ac   | bd   | ad   | ac   | bc   | acd  | bc   | acd  | ad    | ad   | acd   | acd   | bcd   | ac    | ac    | acd  | ad    | bcd   |
| GD162      | 4  | ac                                                  | ac   | bd   | ad   | ac   | bc   | acd  | bc   | acd  | ad    | ad   | acd   | acd   | bcd   | ac    | ac    | acd  | ad    | ---   |
| Hi04c10x_3 | 4  | bc                                                  | bc   | ad   | bd   | bc   | ac   | c--  | ad   | c--  | bd    | bd   | c--   | c--   | ac-   | bc    | bc    | c--  | bd    | ac-   |
| CH04e02    | 4  | ee                                                  | ef   | fg   | fg   | fg   | eg   | eef  | eg   | efg  | ef    | ef   | efg   | eef   | eef   | ef    | fg    | efg  | ef    | eef   |
| Hi07b02_4  | 4  | ee                                                  | ee   | fg   | eg   | ee   | ef   | eeg  | ef   | efg  | eg    | eg   | efg   | eeg   | eeg   | eg    | ee    | efg  | eg    | eeg   |
| CH03a04    | 5  | ad                                                  | ac   | bd   | ad   | bd   | ad   | bcd  | bc   | bd   | bd    | bcd  | ac    | ac    | ac    | bcd   | bc    | bcd  | acd   | bc    |
| CH04g09y   | 5  | bc                                                  | bc   | bc   | bc   | ad   | bd   | acd  | ad   | ad   | ac    | bcd  | bc    | bc    | bc    | bcd   | bc    | acd  | bcd   | bc    |
| CH05e06    | 5  | ad                                                  | ad   | ad   | bd   | bc   | ac   | bcd  | bc   | bc   | bd    | acd  | ad    | ad    | ad    | acd   | ad    | bcd  | acd   | ad    |
| CH03a09    | 5  | ef                                                  | fg   | ef   | fg   | ee   | ee   | eeg  | ee   | ee   | eg    | afg  | fg    | fg    | fg    | eeg   | fg    | eeg  | efg   | eg    |
| CH04e03    | 5  | fg                                                  | eg   | eg   | fg   | ef   | fg   | efg  | ef   | fg   | fg    | eeg  | eg    | eg    | eg    | eeg   | eg    | efg  | eeg   | eg    |
| CH04h02_2  | 5  | k-                                                  | hk   | hk   | k-   | hk   | hk   | hhk  | k-   | hh   | hk    | hkk  | hk    | hk    | hk    | hhk   | hk    | hkk  | hhk   | hk-   |

| Markers    | Aneuploid seedlings from the cross of 'Fuji × Gala' |       |      |      |      |      |      |      |       |       |       |       |      |       |       |       |       |      |       |
|------------|-----------------------------------------------------|-------|------|------|------|------|------|------|-------|-------|-------|-------|------|-------|-------|-------|-------|------|-------|
|            | LG                                                  | FG01  | FG02 | FG03 | FG04 | FG05 | FG06 | FG07 | FG08  | FG09  | FG10  | FG11  | FG12 | FG13  | FG14  | FG15  | FG16  | FG17 | FG18  |
| CH04h02_4  | 5 h-                                                | h-    | h-   | kk   | kk   | h-   | hk-  | h-   | h-    | h-    | hk-   | h-    | h-   | h-    | hk-   | kk    | hk-   | hk-  | h-    |
| Hi04d02    | 5 k-                                                | hk    | hk   | k-   | hk   | hk   | hkh  | k-   | hh    | hk    | hkh   | hk    | hk   | hk    | hkk   | hk    | hkh   | hkh  | hk-   |
| Hi11a03    | 5 hk                                                | k-    | k-   | hk   | hk   | hk   | hkk  | k-   | hh    | hk    | hkh   | hk    | hk   | hk    | hkh   | hk    | hkk   | hkh  | k-    |
| Hi21c08    | 5 hk                                                | h-    | h-   | hk   | hk   | hk   | hkh  | h-   | kk    | hk    | hkk   | hk    | h-   | hk    | hkk   | hk    | hkh   | hkk  | h-    |
| CH02a08z   | 5 ll                                                | ll    | ll   | ll   | lm   | ll   | lll  | lm   | ll    | ll    | llm   | ll    | ll   | ll    | llm   | ll    | llm   | lll  | ll    |
| CH03d07    | 6 ac                                                | ac    | bd   | ac   | bc   | ac   | bcd  | ac   | ad    | bd    | acd   | ad    | ac   | acd   | acd   | ad    | acd   | bcd  | bd    |
| CH03d12    | 6 ac                                                | bd    | bd   | bd   | ad   | bd   | acd  | bd   | bc    | ac    | bcd   | bc    | bd   | bcd   | bcd   | bc    | bcd   | acd  | ad    |
| Hi01d05    | 6 ee                                                | fg    | fg   | fg   | fg   | fg   | eeg  | fg   | ee    | ee    | efg   | ef    | fg   | efg   | efg   | ee    | eeg   | eeg  | eg    |
| AJ000761   | 6 k-                                                | k-    | k-   | k-   | k-   | k-   | hk-  | k-   | k-    | k-    | hk-   | k-    | k-   | hk-   | hk-   | k-    | hk-   | hk-  | k-    |
| CH03c01    | 6 h-                                                | h-    | h-   | h-   | h-   | h-   | hk-  | h-   | h-    | h-    | hk-   | h-    | h-   | hk-   | hk-   | h-    | hk-   | hk-  | h-    |
| Hi04c10x_2 | 7 ac                                                | bd    | bd   | bc   | ad   | ac   | ad   | ad   | bd    | ac    | ac    | ac    | ac   | bc    | ad    | ad    | ad    | ad   | ad    |
| CH05b06z_2 | 7 ee                                                | fg    | fg   | ef   | eg   | ee   | eg   | fg   | fg    | ee    | ef    | ee    | ee   | ef    | eg    | eg    | eg    | eg   | eg    |
| CH04e05    | 7 nn                                                | np    | np   | nn   | np   | np   | np   | np   | nn    | np    | np    | np    | np   | nn    | np    | np    | np    | np   | nn    |
| Hi05b09    | 7 nn                                                | np    | np   | nn   | nn   | nn   | np   | nn   | np    | nn    | nn    | nn    | nn   | np    | nn    | nn    | np    | nn   | nn    |
| CH01c06    | 8 ac                                                | bd    | bc   | ac   | ad   | ad   | bd   | bc   | ad    | ac    | ac    | bc    | ad   | ac    | bd    | ac    | ac    | bd   | ad    |
| Hi04b12    | 8 ad                                                | bd    | bd   | ac   | bc   | bc   | ac   | ad   | bc    | bd    | bd    | ad    | bd   | bd    | ac    | bd    | bd    | ac   | ac    |
| Hi23g12    | 8 ll                                                | ll    | ll   | lm   | lm   | lm   | lm   | ll   | lm    | ll    | ll    | ll    | lm   | ll    | lm    | ll    | ll    | lm   | lm    |
| CH02g09    | 8 np                                                | nn    | nn   | np   | np   | np   | nn   | nn   | np    | np    | np    | nn    | nn   | np    | nn    | np    | np    | nn   | nn    |
| Hi04e05    | 8 nn                                                | nn    | nn   | np   | nn   | nn   | nn   | np   | nn    | nn    | nn    | np    | np   | nn    | np    | nn    | nn    | np   | np    |
| CH01h02_2  | 9 bc                                                | bc    | bd   | bcd  | ad   | bd   | ac   | bc   | acd   | bcd   | acd   | bcd   | ad   | bcd   | bcd   | acd   | bcd   | bc   | acd   |
| CH05c07    | 9 ad                                                | bcd   | ac   | bc   | bd   | ac   | ac   | bc   | acd   | bcd   | bcd   | acd   | ac   | bcd   | bcd   | acd   | bcd   | ac   | acd   |
| GD142      | 9 bc                                                | bcd   | ad   | ac   | bc   | bd   | bd   | bc   | acd   | bcd   | bcd   | bcd   | bc   | bcd   | acd   | acd   | bcd   | ac   | acd   |
| Hi05e07    | 9 ac                                                | acd   | ad   | ad   | bc   | ac   | bd   | ad   | c--   | ac-   | c--   | ac-   | bc   | ac-   | ac-   | c--   | ac-   | ad   | c--   |
| NH029a     | 9 ad                                                | acd   | ac   | ac   | bd   | ad   | bc   | ac   | bc-   | ac-   | bc-   | ac-   | bd   | ac-   | ac-   | bc-   | ac-   | ac   | bc-   |
| CH01h02_1  | 9 hk                                                | hk-   | k-   | hk   | hh   | hk   | k-   | k-   | hkh   | hkk   | hkh   | hkh   | hh   | hkk   | hkh   | hkh   | hkk   | k-   | hkk   |
| CH05d08y_2 | 9 lm                                                | lm-   | lm   | lm   | ll   | lm   | ll   | lm   | lll   | llm   | lll   | llm   | ll   | llm   | llm   | lll   | llm   | lm   | lll   |
| Hi01d01    | 9 np                                                | np1p2 | np   | np   | nn   | np   | nn   | np   | np1p2 | np1p2 | np1p2 | np1p2 | nn   | np1p2 | np1p2 | np1p2 | np1p2 | np   | np1p2 |
| CH01f07a   | 10 a                                                | bd    | ac-  | bc   | ac-  | ac   | bd   | ac-  | bc-   | ac    | ad    | bc-   | ac-  | bd    | bc-   | bc-   | ad    | bc   | ac-   |
| CH01f12    | 10 b                                                | bd    | bcd  | bd   | bcd  | bc   | bd   | bcd  | bcd   | ad    | ad    | acd   | acd  | bc    | bcd   | acd   | ad    | bd   | acd   |
| CH02b03b   | 10 a                                                | ac    | cd-  | ad   | cd-  | bd   | ac   | bcd  | acd   | bd    | bc    | acd   | bcd  | ac    | acd   | acd   | bc    | ad   | bcd   |
| CH02b07    | 10 a                                                | ac    | acd  | bc   | bcd  | bd   | bc   | bcd  | bcd   | bc    | ac    | acd   | acd  | ad    | bcd   | acd   | ad    | bc   | acd   |
| CH02c11    | 10 a                                                | ac    | bcd  | ad   | bcd  | bd   | ac   | bcd  | acd   | bd    | bc    | acd   | bcd  | ac    | acd   | acd   | bc    | ad   | bcd   |
| MS06g03    | 10 a                                                | ac    | c--  | ad   | c--  | bd   | ad   | c--  | ac-   | bd    | bc    | ac-   | c--  | ac    | ac-   | ac-   | bc    | ad   | c--   |
| Hi04f08    | 10 l                                                | lm    | llm  | ll   | llm  | ll   | ll   | llm  | llm   | lm    | lm    | lll   | lll  | ll    | lll   | llm   | lm    | lm   | lll   |

| Markers    | Aneuploid seedlings from the cross of 'Fuji × Gala' |      |       |      |       |      |      |       |       |      |      |       |       |      |       |       |      |      |       |      |
|------------|-----------------------------------------------------|------|-------|------|-------|------|------|-------|-------|------|------|-------|-------|------|-------|-------|------|------|-------|------|
|            | LG                                                  | FG01 | FG02  | FG03 | FG04  | FG05 | FG06 | FG07  | FG08  | FG09 | FG10 | FG11  | FG12  | FG13 | FG14  | FG15  | FG16 | FG17 | FG18  | FG19 |
| MS02a01    | 10 l                                                | lm   | llm   | ll   | llm   | ll   | lm   | llm   | llm   | ll   | lm   | lll   | llm   | lm   | lll   | lll   | lm   | ll   | lll   |      |
| CH02a10    | 10 n                                                | nn   | np1p2 | np   | np1p2 | np   | np   | np1p2 | np1p2 | np   | nn   | np1p2 | np1p2 | nn   | np1p2 | np1p2 | nn   | np   | np1p2 |      |
| CH03d11    | 10 n                                                | np   | np1p2 | nn   | np1p2 | nn   | nn   | np1p2 | np1p2 | nn   | np   | np1p2 | np1p2 | nn   | np1p2 | np1p2 | np   | nn   | np1p2 |      |
| CH04c06y_1 | 10 n                                                | nn   | np1p2 | np   | np1p2 | np   | np   | np1p2 | np1p2 | np   | nn   | np1p2 | np1p2 | nn   | np1p2 | np1p2 | nn   | np   | np1p2 |      |
| Hi02d04    | 10 n                                                | np   | nnp   | np   | nnp   | nn   | nn   | nnp   | nnp   | np   | np   | nnp   | nnp   | np   | nnp   | nnp   | nn   | nn   | nnp   |      |
| CH02d08    | 11 bd                                               | bc   | bc    | ad   | ad    | ac   | ac   | bc    | bd    | ad   | bd   | ac    | ad    | acd  | bc    | bc    | bd   | bd   | bd    |      |
| CH04g07    | 11 ad                                               | bc   | ac    | bd   | bd    | ac   | bc   | ad    | ac    | bd   | ad   | ac    | bd    | acd  | ac    | ac    | ac   | bd   | bc    |      |
| CH04h02_1  | 11 ac                                               | ad   | ad    | bc   | bc    | bd   | bd   | ad    | ac    | bc   | ac   | bd    | bc    | bcd  | bc    | ad    | ac   | ac   | ac    |      |
| Hi06b06    | 11 ac                                               | bd   | ad    | bc   | bd    | ad   | bd   | ac    | ad    | bc   | ac   | ad    | bc    | ac-  | ad    | ad    | ad   | bc   | bd    |      |
| CH04h02_3  | 11 lm                                               | lm   | lm    | ll   | ll    | ll   | ll   | lm    | lm    | ll   | lm   | ll    | ll    | llm  | lm    | lm    | lm   | lm   | lm    |      |
| CH01b12y   | 12 bc                                               | bd   | ac    | ad   | bd    | bd   | bc   | ad    | acd   | acd  | acd  | bcd   | bd    | ac   | ad    | bcd   | bcd  | ac   | acd   |      |
| CH01g12    | 12 ac                                               | bd   | ad    | bc   | ac    | ac   | ad   | bc    | bcd   | bcd  | bcd  | acd   | ac    | bd   | bc    | acd   | acd  | bc   | bcd   |      |
| NZ28f04    | 12 bd                                               | bc   | bc    | bd   | ac    | ad   | bc   | bd    | bcd   | bcd  | bcd  | acd   | ad    | ac   | bd    | bcd   | acd  | bc   | acd   |      |
| CH01f02    | 12 ee                                               | eg   | eg    | ef   | ef    | fg   | ee   | ee    | efg   | efg  | eef  | eef   | eg    | ef   | ee    | efg   | eef  | ee   | eef   |      |
| CH05d04    | 12 eg                                               | eg   | fg    | ee   | ef    | fg   | ee   | fg    | efg   | efg  | efg  | eef   | eg    | ef   | fg    | efg   | eef  | fg   | eef   |      |
| CH05d11    | 12 ef                                               | ef   | fg    | eg   | eg    | ee   | fg   | fg    | efg   | efg  | eeg  | eeg   | ef    | eg   | fg    | efg   | eeg  | fg   | eeg   |      |
| CH03h03z_2 | 12 lm                                               | ll   | ll    | lm   | ll    | lm   | ll   | lm    | lll   | lll  | llm  | llm   | lm    | ll   | lm    | lll   | llm  | ll   | lll   |      |
| CH03a08    | 13 bd                                               | ad   | bd    | bc   | ac    | bc   | bd   | acd   | bc    | ac   | bcd  | acd   | bd    | ad   | acd   | ac    | bcd  | bcd  | bc    |      |
| CH03h03z_1 | 13 ad                                               | bd   | ad    | ac   | bc    | ac   | ad   | c--   | ac    | bc   | ac-  | c--   | ad    | bd   | c--   | bc    | ac-  | ac-  | ac    |      |
| CH05c06_1  | 13 ac                                               | ad   | bc    | ac   | ad    | bd   | bd   | bc-   | bd    | bd   | bc-  | bc-   | bc    | ac   | c--   | bc    | bc-  | bc-  | ad    |      |
| CH05f04    | 13 bd                                               | ac   | bc    | bc   | bd    | ad   | ad   | ac-   | ac    | ad   | ac-  | ac-   | ac    | bc   | c--   | ac    | ac-  | ac-  | bd    |      |
| CH05h05    | 13 bc                                               | ad   | bd    | bd   | bc    | ac   | ac   | acd   | ac    | ac   | acd  | acd   | ad    | bd   | bcd   | ad    | acd  | acd  | bc    |      |
| Hi03e04    | 13 ac                                               | bc   | bc    | ad   | bd    | ad   | ac   | acd   | ad    | bd   | acd  | bcd   | ac    | bc   | acd   | ad    | bcd  | acd  | ad    |      |
| Hi20b03    | 13 ad                                               | ad   | bd    | ac   | bc    | ac   | ad   | bcd   | ac    | bc   | bcd  | acd   | ad    | ad   | bcd   | bc    | acd  | bcd  | ac    |      |
| NH009b     | 13 bc                                               | ac   | bc    | bd   | ad    | bd   | bc   | acd   | bd    | ad   | acd  | bcd   | bc    | bc   | acd   | ad    | bcd  | acd  | bd    |      |
| AU223486   | 13 hh                                               | k-   | hh    | hk   | k-    | hk   | hh   | hkk   | hk    | k-   | hhk  | hkk   | hh    | k-   | hhk   | k-    | hkk  | hhk  | hk    |      |
| GD147      | 13 k-                                               | k-   | hh    | k-   | hk    | k-   | k-   | hhk   | k-    | hk   | hkk  | hhk   | hh    | k-   | hkk   | hk    | hhk  | hkk  | k-    |      |
| Hi05c06_2  | 13 h-                                               | kk   | h-    | h-   | hk    | h-   | h-   | hhk   | h-    | hk   | hhk  | hkk   | kk    | h-   | hhk   | hk    | hkk  | hhk  | h-    |      |
| Hi07b02_3  | 13 np                                               | np   | np    | np   | nn    | np   | np   | nnp   | np    | nn   | nnp  | nnp   | nn    | np   | nnp   | nn    | nnp  | nnp  | np    |      |
| NZ03c01x_2 | 13 np                                               | nn   | np    | np   | np    | np   | np   | nnp   | np    | nn   | nnp  | nnp   | np    | nn   | nnp   | nn    | nnp  | nnp  | nn    |      |
| CH01g05    | 14 ad                                               | bc   | ac    | ac   | bc    | ad   | ac   | bc    | bcd   | bc   | ac   | bd    | bcd   | bc   | bc    | ad    | bcd  | ac   | acd   |      |
| CH03a02    | 14 bd                                               | ac   | ac    | ad   | bd    | bc   | ac   | bd    | bcd   | bd   | ad   | bc    | bcd   | bd   | bd    | ac    | bcd  | ad   | acd   |      |
| CH03d08    | 14 ad                                               | bd   | bc    | bd   | ad    | bc   | bd   | ad    | acd   | ad   | bd   | ac    | acd   | ad   | ad    | bc    | acd  | bd   | bcd   |      |
| CH05g07z_1 | 14 k-                                               | hk   | hk    | hk   | k-    | hk   | k-   | hk    | hhk   | k-   | hk   | hh    | hkk   | k-   | hk    | k-    | hhk  | k-   | hkk   |      |

| Markers    | LG | Aneuploid seedlings from the cross of 'Fuji × Gala' |      |      |       |      |       |      |      |       |       |       |      |       |       |      |       |      |       |       |
|------------|----|-----------------------------------------------------|------|------|-------|------|-------|------|------|-------|-------|-------|------|-------|-------|------|-------|------|-------|-------|
|            |    | FG01                                                | FG02 | FG03 | FG04  | FG05 | FG06  | FG07 | FG08 | FG09  | FG10  | FG11  | FG12 | FG13  | FG14  | FG15 | FG16  | FG17 | FG18  | FG19  |
| CH05g07z_2 | 14 | hk                                                  | hk   | h-   | hk    | h-   | hk    | h-   | hk   | hkk   | h-    | hk    | kk   | hhk   | h-    | hk   | h-    | hkk  | h-    | hhk   |
| CH02c02a_1 | 15 | ac                                                  | ad   | ad   | bd    | ac   | bcd   | bc   | ad   | bd    | bcd   | bcd   | bd   | ac    | bcd   | ad   | bcd   | ac   | bcd   | ac    |
| CH02d11    | 15 | bd                                                  | bc   | bd   | ad    | ac   | acd   | ac   | ac   | ac    | acd   | acd   | ac   | ac    | acd   | bd   | bcd   | ad   | acd   | ac    |
| CH03b10    | 15 | ad                                                  | ac   | ad   | bd    | bc   | bcd   | bc   | bc   | bc    | bcd   | acd   | bc   | bc    | bcd   | ad   | acd   | bd   | bcd   | bc    |
| Hi04c05    | 15 | ad                                                  | ac   | ac   | bc    | bd   | bcd   | bd   | bd   | bc    | bcd   | bcd   | bc   | bd    | bcd   | ac   | bcd   | bc   | bcd   | bd    |
| Hi06f09    | 15 | bd                                                  | bc   | bc   | ac    | bd   | ac-   | ad   | bd   | ad    | ac-   | ac-   | ac   | bd    | ac-   | bc   | ac-   | ac   | ac-   | ad    |
| NZ02b01    | 15 | ad                                                  | ac   | ac   | bc    | bd   | bcd   | bd   | bd   | bc    | bcd   | bcd   | bc   | bc    | bcd   | ac   | bcd   | bc   | bcd   | bd    |
| Hi02g06    | 15 | ll                                                  | ll   | ll   | lm    | lm   | lll   | lm   | ll   | lm    | llm   | lll   | lm   | ll    | llm   | lm   | llm   | ll   | llm   | ll    |
| CH02c09    | 15 | nn                                                  | np   | nn   | np    | np   | np1p2 | np   | np   | np    | np1p2 | np1p2 | np   | np    | np1p2 | nn   | np1p2 | np   | np1p2 | np    |
| CH02d10a   | 16 | ad                                                  | ad   | bc   | ad    | ac   | acd   | ad   | bcd  | bd    | bcd   | ac    | bc   | bc    | bcd   | bcd  | acd   | ac   | bcd   | bd    |
| CH04f10    | 16 | bd                                                  | bc   | ac   | ac    | ad   | bcd   | bc   | acd  | bc    | acd   | bd    | ad   | ad    | bcd   | bcd  | bcd   | bd   | bcd   | ac    |
| CH05a04    | 16 | ac                                                  | ad   | bc   | bc    | ac   | acd   | ad   | bcd  | ad    | bcd   | ac    | bc   | bc    | acd   | acd  | bcd   | ac   | acd   | bd    |
| CH05c06_2  | 16 | ad                                                  | bd   | bc   | bc    | ac   | bcd   | ad   | acd  | ad    | bcd   | ac    | bc   | bc    | bcd   | acd  | acd   | bd   | acd   | bc    |
| Hi01d06y   | 16 | ad                                                  | ac   | bc   | bc    | bd   | acd   | ad   | bcd  | ac    | bcd   | ad    | bd   | bd    | acd   | acd  | acd   | ad   | acd   | bc    |
| Hi04e04    | 16 | bc                                                  | bc   | ad   | ad    | bd   | acd   | bc   | acd  | bc    | acd   | bd    | ad   | ad    | acd   | bcd  | bcd   | ac   | bcd   | ac    |
| CH05b06z_1 | 16 | fg                                                  | ee   | ef   | fg    | eg   | eef   | ee   | efg  | ee    | eef   | eg    | eg   | fg    | eef   | efg  | efg   | ef   | efg   | fg    |
| Hi01c11x   | 16 | eg                                                  | eg   | ee   | ee    | ef   | eeg   | eg   | eeg  | fg    | eeg   | ef    | ef   | ee    | eeg   | efg  | eeg   | eg   | efg   | ee    |
| CH01h01    | 17 | ad                                                  | bd   | ac   | bcd   | bd   | acd   | ac   | bc   | acd   | bcd   | bd    | ac   | acd   | bc    | bc   | acd   | bd   | ac    | acd   |
| CH04c06y_2 | 17 | bc                                                  | ad   | ad   | c--   | bc   | bc-   | ac   | bc   | bc-   | bc-   | bc    | ad   | c--   | bc    | bc   | c--   | ad   | bc    | c--   |
| CH05d08y_1 | 17 | bc                                                  | bc   | ad   | c--   | ad   | ac-   | bd   | ad   | ac-   | ac-   | ad    | bc   | c--   | ad    | ad   | c--   | bc   | ad    | c--   |
| CH05g03    | 17 | bd                                                  | ac   | bc   | acd   | ad   | bcd   | bc   | ac   | bcd   | acd   | ad    | bc   | bcd   | ac    | ac   | bcd   | ad   | bc    | bcd   |
| Hi07b02_2  | 17 | ll                                                  | ll   | ll   | lll   | lm   | lll   | ll   | ll   | llm   | lll   | lm    | ll   | lll   | ll    | lm   | llm   | ll   | lm    | lll   |
| CH04c06y_3 | 17 | np                                                  | np   | nn   | np1p2 | np   | np1p2 | np   | np   | np1p2 | np1p2 | np    | np   | np1p2 | np    | nn   | np1p2 | np   | nn    | np1p2 |
| GD96       | 17 | nn                                                  | np   | np   | np1p2 | np   | np1p2 | nn   | nn   | np1p2 | np1p2 | np    | np   | np1p2 | np    | np   | np1p2 | np   | nn    | np1p2 |
| Hi03c05    | 17 | np                                                  | np   | nn   | nnp   | np   | nnp   | nn   | nn   | nnp   | nnp   | nn    | np   | nnp   | np    | np   | nnp   | np   | nn    | nnp   |
| Hi05c06_1  | 17 | np                                                  | np   | nn   | nnp   | nn   | nnp   | np   | nn   | nnp   | nnp   | nn    | np   | nnp   | nn    | nn   | nnp   | np   | nn    | nnp   |
| Hi07b02_1  | 17 | np                                                  | nn   | nn   | nnp   | nn   | nnp   | nn   | nn   | nnp   | nnp   | nn    | np   | nnp   | np    | nn   | nnp   | nn   | np    | nnp   |

| Markers    | LG    | Aneuploid seedlings from the cross of 'Fuji × Gala' |      |       |      |       |       |      |       |       |       |       |       |       |       |       |       |       |      |
|------------|-------|-----------------------------------------------------|------|-------|------|-------|-------|------|-------|-------|-------|-------|-------|-------|-------|-------|-------|-------|------|
|            |       | FG20                                                | FG21 | FG22  | FG23 | FG24  | FG25  | FG26 | FG27  | FG28  | FG29  | FG30  | FG31  | FG32  | FG33  | FG34  | FG35  | FG36  | FG37 |
| CH05g08    | 1 ad  | bc                                                  | ac   | ad    | bd   | bc    | ad    | bc   | ad    | bc    | ad    | ac    | ad    | ac    | ad    | ac    | bd    | ad    |      |
| Hi07d08    | 1 ad  | ad                                                  | bd   | bc    | ac   | ad    | bc    | ad   | bc    | ad    | bc    | bd    | bc    | bd    | bc    | bd    | ac    | bc    |      |
| Hi12c02    | 1 ad  | bd                                                  | bc   | bd    | ac   | ac    | bc    | ac   | ad    | ac    | bc    | bc    | ad    | bc    | bd    | bc    | ad    | bd    |      |
| KA4B       | 1 kk  | kk                                                  | h-   | h-    | hk   | hk    | h-    | hk   | kk    | hk    | h-    | h-    | kk    | h-    | h-    | h-    | kk    | h-    |      |
| Hi02b10    | 1 lm  | ll                                                  | ll   | lm    | --   | lm    | lm    | ll   | lm    | lm    | ll    | ll    | lm    | ll    | ll    | ll    | ll    | lm    |      |
| Hi02c07    | 1 np  | nn                                                  | nn   | np    | np   | np    | np    | nn   | np    | np    | nn    | nn    | np    | nn    | nn    | nn    | nn    | np    |      |
| CH02a04z   | 2 bd  | bd                                                  | bd   | acd   | bc   | acd   | bc    | ac   | bc    | acd   | bcd   | bcd   | bcd   | bcd   | ad    | bcd   | bcd   | bcd   |      |
| CH02c02a_  | 2 bc  | bd                                                  | bc   | bcd   | ac   | acd   | bd    | ad   | bd    | acd   | bcd   | bcd   | bcd   | bcd   | bc    | bcd   | acd   | bcd   |      |
| CH02c06    | 2 bc  | bc                                                  | bc   | acd   | ac   | acd   | bd    | ad   | bd    | acd   | bcd   | bcd   | bcd   | bcd   | bc    | bcd   | bcd   | bcd   |      |
| CH03d01    | 2 ad  | ad                                                  | ad   | c--   | ac   | c--   | ac    | bc   | ac    | c--   | ac-   | ac-   | ac-   | ac-   | bd    | ac-   | ac-   | ac-   |      |
| CH05e03    | 2 ac  | ac                                                  | ac   | bcd   | ad   | bcd   | ad    | bd   | ad    | bcd   | acd   | acd   | acd   | acd   | bc    | acd   | acd   | acd   |      |
| CN493139   | 2 bc  | bc                                                  | ac   | ac-   | ad   | ac-   | bc    | bc   | bd    | ac-   | bc-   | bc-   | bc-   | ac-   | ac    | ac-   | ac-   | bc-   |      |
| Hi02a07    | 2 bc  | bc                                                  | bc   | ac-   | ad   | ac-   | bd    | bd   | bd    | ac-   | c--   | c--   | c--   | c--   | ac    | c--   | c--   | c--   |      |
| Hi05c06_3  | 2 lm  | lm                                                  | lm   | lll   | ll   | lll   | ll    | ll   | ll    | lll   | llm   | lll   | lll   | llm   | lm    | llm   | lll   | lll   |      |
| CH02c02a_  | 2 np  | np                                                  | np   | np1p2 | np   | np1p2 | np    | np   | np    | np1p2 | np1p2 | np1p2 | np1p2 | np1p2 | np    | np1p2 | np1p2 | np1p2 |      |
| CH03d10    | 2 np  | np                                                  | np   | np1p2 | np   | np1p2 | np    | np   | np    | np1p2 | np1p2 | np1p2 | np1p2 | np1p2 | np    | np1p2 | np1p2 | np1p2 |      |
| CH03e03    | 3 ad  | bc                                                  | bd   | ac-   | ac   | bc-   | bc-   | ad   | bc-   | ac    | bd    | bc-   | ac-   | bc    | ac-   | bc-   | ac-   | ad    |      |
| CH03g07    | 3 bc  | bc                                                  | ad   | acd   | ac   | bcd   | bcd   | bd   | bcd   | bc    | bd    | bcd   | acd   | bc    | acd   | bcd   | acd   | ad    |      |
| HGA8bY     | 3 bc  | ac                                                  | bd   | bcd   | bd   | bcd   | bcd   | bd   | bcd   | bd    | ac    | acd   | acd   | ac    | bcd   | acd   | bcd   | bc    |      |
| Hi04c10x_1 | 3 ac  | ad                                                  | bd   | c--   | bd   | ac-   | ac-   | ad   | ac-   | ac    | bd    | ac-   | c--   | bc    | ac-   | c--   | c--   | ad    |      |
| Hi07e08x   | 3 ad  | bd                                                  | ac   | bc-   | bd   | ac-   | ac-   | bc   | ac-   | bd    | ac    | ac-   | bc-   | ad    | bc-   | ac-   | bc-   | bc    |      |
| AU223657   | 3 np  | np                                                  | nn   | np1p2 | np   | np1p2 | np1p2 | nn   | np1p2 | nn    | np    | np1p2 | np1p2 | nn    | np1p2 | np1p2 | np1p2 | nn    |      |
| CH02c02b   | 4 bc  | bd                                                  | bcd  | ad    | acd  | acd   | bcd   | bd   | bcd   | acd   | bcd   | bcd   | bcd   | bcd   | acd   | bcd   | bcd   | bcd   |      |
| CH05d02    | 4 bc  | bd                                                  | bcd  | ac    | bcd  | acd   | acd   | ac   | bcd   | acd   | bcd   | bcd   | bcd   | bcd   | acd   | bcd   | bcd   | bcd   |      |
| GD162      | 4 bc  | bd                                                  | bcd  | ac    | bcd  | acd   | acd   | ac   | bcd   | acd   | bcd   | bcd   | bcd   | bcd   | acd   | bcd   | bcd   | bcd   |      |
| Hi04c10x_3 | 4 ac  | ad                                                  | ac-  | bc    | ac-  | c--   | c--   | bc   | ac-   | ac-   | ac-   | ac-   | ac-   | ac-   | c--   | ac-   | ac-   | ac-   |      |
| CH04e02    | 4 ee  | eg                                                  | efg  | eg    | efg  | efg   | eef   | fg   | efg   | eef   | efg   | efg   | eef   | eef   | eef   | eef   | efg   | eef   |      |
| Hi07b02_4  | 4 ef  | fg                                                  | efg  | ef    | efg  | efg   | eeg   | ee   | efg   | eeg   | efg   | efg   | eeg   | eeg   | eeg   | eeg   | efg   | eeg   |      |
| CH03a04    | 5 bcd | bcd                                                 | acd  | bcd   | acd  | acd   | acd   | acd  | acd   | acd   | ad    | bd    | acd   | bcd   | acd   | bcd   | bcd   | acd   |      |
| CH04g09y   | 5 acd | acd                                                 | acd  | acd   | bcd  | bcd   | bcd   | bcd  | acd   | bcd   | bc    | ad    | acd   | acd   | bcd   | acd   | acd   | acd   |      |
| CH05e06    | 5 bcd | acd                                                 | bcd  | bcd   | acd  | acd   | acd   | acd  | bcd   | acd   | ad    | bc    | bcd   | bcd   | acd   | acd   | bcd   | bcd   |      |
| CH03a09    | 5 eeg | eeg                                                 | efg  | eeg   | efg  | efg   | efg   | efg  | efg   | efg   | ef    | eg    | efg   | eeg   | efg   | eeg   | eeg   | eeg   |      |
| CH04e03    | 5 efg | efg                                                 | efg  | efg   | eeg  | eeg   | eeg   | eeg  | efg   | eeg   | eg    | ef    | efg   | efg   | eeg   | efg   | efg   | efg   |      |
| CH04h02_2  | 5 hkk | hkk                                                 | hkk  | hkk   | hkk  | hkk   | hkk   | hkk  | hkk   | hkk   | k-    | k-    | hkk   | hkk   | hkk   | hkk   | hkk   | hkk   |      |

| Markers    | Aneuploid seedlings from the cross of 'Fuji × Gala' |       |      |       |       |       |      |       |       |      |       |       |       |       |       |       |       |       |       |
|------------|-----------------------------------------------------|-------|------|-------|-------|-------|------|-------|-------|------|-------|-------|-------|-------|-------|-------|-------|-------|-------|
|            | LG                                                  | FG20  | FG21 | FG22  | FG23  | FG24  | FG25 | FG26  | FG27  | FG28 | FG29  | FG30  | FG31  | FG32  | FG33  | FG34  | FG35  | FG36  | FG37  |
| CH04h02_4  | 5                                                   | hk-   | hk-  | hk-   | hk-   | hk-   | hk-  | hk-   | hk-   | hk-  | h-    | kk    | hk-   | hk-   | hk-   | hk-   | hk-   | hk-   | hk-   |
| Hi04d02    | 5                                                   | hhk   | hkk  | hkk   | hhk   | hkk   | hhk  | hkk   | hhk   | hkk  | k-    | k-    | hkk   | hhk   | hkk   | hhk   | hkk   | hhk   | hkk   |
| Hi11a03    | 5                                                   | hkk   | hkk  | hhk   | hhk   | hkk   | hkk  | hhk   | hkk   | hhk  | k-    | k-    | hkk   | hkk   | hhk   | hhk   | hkk   | hkk   | hkk   |
| Hi21c08    | 5                                                   | hkk   | hhk  | hkk   | hhk   | hkk   | hkk  | hhk   | hkk   | hhk  | h-    | h-    | hhk   | hkk   | hkk   | hhk   | hkk   | hhk   | hkk   |
| CH02a08z   | 5                                                   | lll   | llm  | llm   | lll   | lll   | lll  | llm   | lll   | llm  | lll   | ll    | llm   | lll   | lll   | llm   | lll   | lll   | lll   |
| CH03d07    | 6                                                   | bc    | acd  | acd   | ad    | bd    | bcd  | acd   | ac    | ac   | bc    | bcd   | bcd   | acd   | bcd   | acd   | bcd   | bcd   | bcd   |
| CH03d12    | 6                                                   | ac    | bcd  | bcd   | bc    | ac    | acd  | bcd   | bd    | bd   | ad    | acd   | acd   | bcd   | acd   | bcd   | acd   | acd   | acd   |
| Hi01d05    | 6                                                   | ee    | efg  | efg   | ef    | ee    | efg  | efg   | fg    | fg   | eg    | eeg   | eeg   | efg   | eeg   | efg   | eeg   | eeg   | eeg   |
| AJ000761   | 6                                                   | k-    | hk-  | hk-   | k-    | k-    | hk-  | hk-   | k-    | k-   | hk-   | hk-   | hk-   | hk-   | hk-   | hk-   | hk-   | hk-   | hk-   |
| CH03c01    | 6                                                   | h-    | hk-  | hk-   | h-    | h-    | hk-  | hk-   | h-    | h-   | h-    | hk-   | hk-   | hk-   | hk-   | hk-   | hk-   | hk-   | hk-   |
| Hi04c10x_2 | 7                                                   | bc    | bd   | ac    | bc    | bd    | bd   | ad    | bd    | bc   | ad    | ac    | ad    | acd   | ad    | bd    | ad    | ad    | bd    |
| CH05b06z_2 | 7                                                   | ef    | fg   | ee    | ef    | fg    | fg   | eg    | fg    | ef   | eg    | ee    | eg    | efg   | eg    | fg    | eg    | eg    | fg    |
| CH04e05    | 7                                                   | np    | nn   | np    | nn    | nn    | nn   | np    | nn    | nn   | np    | np    | np    | np1p2 | np    | nn    | np    | np    | nn    |
| Hi05b09    | 7                                                   | np    | np   | np    | np    | np    | np   | nn    | np    | np   | nn    | nn    | nn    | nnp   | nn    | np    | nn    | nn    | np    |
| CH01c06    | 8                                                   | bd    | ad   | ac    | ad    | bd    | bd   | bd    | bd    | ad   | ac    | ad    | ac    | bc    | ad    | bc    | ad    | ac    | bc    |
| Hi04b12    | 8                                                   | bc    | bc   | bd    | bc    | ac    | ac   | ac    | ac    | bc   | bc    | bd    | bd    | ad    | bc    | ad    | bc    | bd    | ad    |
| Hi23g12    | 8                                                   | lm    | lm   | ll    | lm    | lm    | lm   | lm    | lm    | lm   | lm    | ll    | ll    | ll    | lm    | ll    | lm    | ll    | ll    |
| CH02g09    | 8                                                   | nn    | np   | np    | np    | nn    | nn   | np    | nn    | np   | np    | np    | np    | nn    | np    | nn    | np    | np    | np    |
| Hi04e05    | 8                                                   | np    | nn   | nn    | nn    | np    | np   | nn    | np    | nn   | nn    | nn    | np    | nn    | np    | nn    | nn    | nn    | nn    |
| CH01h02_2  | 9                                                   | bcd   | ac   | acd   | bcd   | acd   | bd   | bcd   | bcd   | bd   | bcd   | acd   | bcd   | bcd   | acd   | bcd   | acd   | acd   | acd   |
| CH05c07    | 9                                                   | acd   | bc   | acd   | acd   | acd   | bd   | acd   | acd   | bd   | acd   | bcd   | bcd   | acd   | bcd   | bcd   | bcd   | bcd   | ad    |
| GD142      | 9                                                   | bcd   | ac   | acd   | bcd   | acd   | bc   | bcd   | bcd   | ac   | bcd   | bcd   | acd   | bcd   | acd   | bcd   | acd   | acd   | bcd   |
| Hi05e07    | 9                                                   | ac-   | bd   | c--   | ac-   | c--   | ac   | ac-   | ac-   | ac   | ac-   | c--   | ac-   | ac-   | c--   | ac-   | c--   | c--   | c--   |
| NH029a     | 9                                                   | ac-   | bc   | bc-   | ac-   | ac-   | ad   | ac-   | ac-   | ad   | ac-   | ac-   | ac-   | ac-   | bc-   | ac-   | bc-   | bc-   | bc-   |
| CH01h02_1  | 9                                                   | hhk   | hh   | hkk   | hhk   | hkk   | hk   | hkk   | hhk   | hk   | hkk   | hkk   | hhk   | hhk   | hhk   | hkk   | hkk   | hhk   | hkk   |
| CH05d08y_2 | 9                                                   | llm   | ll   | lll   | llm   | lll   | lm   | llm   | lll   | lm   | llm   | llm   | llm   | llm   | lll   | llm   | lll   | lll   | lll   |
| Hi01d01    | 9                                                   | np1p2 | nn   | np1p2 | np1p2 | np1p2 | np   | np1p2 | np1p2 | np   | np1p2 | np1p2 | np1p2 | np1p2 | np1p2 | np1p2 | np1p2 | np1p2 | np1p2 |
| CH01f07a   | 10                                                  | bc-   | ac-  | ad    | ac-   | bc-   | ad   | ac-   | ac-   | bc   | ac-   | ac-   | ac-   | ac-   | bc-   | bd    | bc-   | ac-   | bc-   |
| CH01f12    | 10                                                  | bcd   | acd  | ac    | bcd   | bcd   | ad   | acd   | bcd   | bc   | bcd   | acd   | bcd   | acd   | bcd   | bc    | bcd   | acd   | acd   |
| CH02b03b   | 10                                                  | acd   | bcd  | bc    | bcd   | acd   | bc   | bcd   | bcd   | ad   | bcd   | bcd   | bcd   | bcd   | acd   | ac    | acd   | bcd   | acd   |
| CH02b07    | 10                                                  | bcd   | acd  | ad    | bcd   | acd   | ad   | acd   | bcd   | bd   | bcd   | acd   | bcd   | acd   | bcd   | bd    | bcd   | acd   | acd   |
| CH02c11    | 10                                                  | acd   | bcd  | bc    | bcd   | acd   | bc   | bcd   | bcd   | ad   | bcd   | bcd   | bcd   | bcd   | acd   | ac    | acd   | bcd   | acd   |
| MS06g03    | 10                                                  | ac-   | bc-  | bc    | c--   | ac-   | bc   | c--   | c--   | ad   | c--   | c--   | c--   | c--   | ac-   | ac    | ac-   | c--   | ac-   |
| Hi04f08    | 10                                                  | lll   | lll  | ll    | lll   | lll   | ll   | lll   | lll   | ll   | lll   | lll   | lll   | lll   | lll   | ll    | lll   | lll   | llm   |

| Markers    | Aneuploid seedlings from the cross of 'Fuji × Gala' |       |       |      |       |       |      |       |       |      |       |       |       |       |       |      |       |       |       |
|------------|-----------------------------------------------------|-------|-------|------|-------|-------|------|-------|-------|------|-------|-------|-------|-------|-------|------|-------|-------|-------|
|            | LG                                                  | FG20  | FG21  | FG22 | FG23  | FG24  | FG25 | FG26  | FG27  | FG28 | FG29  | FG30  | FG31  | FG32  | FG33  | FG34 | FG35  | FG36  | FG37  |
| MS02a01    | 10                                                  | lll   | lll   | lm   | lll   | lll   | lm   | lll   | llm   | ll   | lll   | lll   | lll   | llm   | lll   | lm   | lll   | lll   | lll   |
| CH02a10    | 10                                                  | np1p2 | np1p2 | nn   | np1p2 | np1p2 | nn   | np1p2 | np1p2 | np   | np1p2 | np1p2 | np1p2 | np1p2 | np1p2 | np   | np1p2 | np1p2 | np1p2 |
| CH03d11    | 10                                                  | np1p2 | np1p2 | np   | np1p2 | np1p2 | np   | np1p2 | np1p2 | nn   | np1p2 | np1p2 | np1p2 | np1p2 | np1p2 | nn   | np1p2 | np1p2 | np1p2 |
| CH04c06y_1 | 10                                                  | np1p2 | np1p2 | nn   | np1p2 | np1p2 | nn   | np1p2 | np1p2 | np   | np1p2 | np1p2 | np1p2 | np1p2 | np1p2 | np   | np1p2 | np1p2 | np1p2 |
| Hi02d04    | 10                                                  | nnp   | nnp   | nn   | nnp   | nnp   | np   | nnp   | nnp   | np   | nnp   | nnp   | nnp   | nnp   | nnp   | np   | nnp   | nnp   | nnp   |
| CH02d08    | 11                                                  | ad    | ac    | ac   | ad    | acd   | ad   | acd   | bcd   | acd  | bd    | ac    | bc    | bd    | bcd   | bd   | bc    | bd    | acd   |
| CH04g07    | 11                                                  | ad    | ac    | ac   | bd    | bcd   | bd   | bcd   | bcd   | bcd  | bd    | ac    | ac    | ad    | acd   | ad   | ad    | bd    | bcd   |
| CH04h02_1  | 11                                                  | bc    | bd    | bd   | bc    | bcd   | bc   | bcd   | acd   | bcd  | ac    | bd    | ad    | ac    | acd   | ac   | ad    | ac    | bcd   |
| Hi06b06    | 11                                                  | ac    | ad    | ad   | bc    | bc-   | bc   | bc-   | bc-   | bc-  | bc    | ad    | ad    | ac    | ac-   | ac   | ac    | bc    | bc-   |
| CH04h02_3  | 11                                                  | ll    | ll    | ll   | ll    | llm   | lm   | llm   | lll   | llm  | lm    | ll    | lm    | lm    | lll   | lm   | lm    | lm    | llm   |
| CH01b12y   | 12                                                  | bcd   | acd   | acd  | bd    | acd   | acd  | acd   | acd   | bcd  | bcd   | acd   | ac    | ad    | acd   | ad   | acd   | bd    | bcd   |
| CH01g12    | 12                                                  | acd   | bcd   | bcd  | ac    | bcd   | bcd  | bcd   | bcd   | acd  | acd   | bcd   | bd    | bc    | bcd   | bc   | bcd   | ac    | acd   |
| NZ28f04    | 12                                                  | bcd   | bcd   | bcd  | ad    | bcd   | bcd  | bcd   | bcd   | acd  | acd   | bcd   | bd    | bd    | bcd   | bd   | bcd   | bd    | acd   |
| CH01f02    | 12                                                  | eef   | efg   | efg  | fg    | eef   | efg  | efg   | efg   | eef  | eef   | efg   | eg    | ef    | efg   | eg   | efg   | eg    | eef   |
| CH05d04    | 12                                                  | eef   | efg   | efg  | ee    | eef   | efg  | efg   | efg   | eef  | eef   | efg   | eg    | ef    | efg   | eg   | efg   | eg    | eef   |
| CH05d11    | 12                                                  | eeg   | efg   | efg  | ee    | eeg   | efg  | efg   | efg   | eeg  | eeg   | efg   | ef    | eg    | efg   | ef   | efg   | ef    | eeg   |
| CH03h03z_2 | 12                                                  | llm   | lll   | llm  | lm    | lll   | lll  | lll   | lll   | llm  | lll   | llm   | lm    | lm    | llm   | lm   | llm   | lm    | lll   |
| CH03a08    | 13                                                  | ad    | acd   | bcd  | bcd   | bd    | ac   | ad    | ad    | acd  | bcd   | acd   | bd    | bd    | bcd   | bcd  | bcd   | acd   | bc    |
| CH03h03z_1 | 13                                                  | bd    | c--   | ac-  | ac-   | ad    | bc   | bd    | bd    | c--  | ac-   | c--   | ad    | ad    | ac-   | ac-  | ac-   | c--   | ac    |
| CH05c06_1  | 13                                                  | ac    | c--   | bc-  | c--   | bc    | ad   | ac    | bd    | bc-  | c--   | bc-   | bc    | bc    | c--   | c--  | c--   | bc-   | bd    |
| CH05f04    | 13                                                  | bc    | c--   | ac-  | c--   | bc    | bd   | ac    | ad    | ac-  | c--   | ac-   | ac    | ac    | c--   | c--  | c--   | ac-   | ad    |
| CH05h05    | 13                                                  | bd    | bcd   | acd  | bcd   | bd    | bc   | ad    | ac    | acd  | bcd   | acd   | ad    | ad    | bcd   | bcd  | bcd   | acd   | ac    |
| Hi03e04    | 13                                                  | bc    | acd   | acd  | bcd   | ac    | bd   | bc    | bc    | bcd  | bcd   | bcd   | ac    | bc    | bcd   | acd  | bcd   | acd   | ad    |
| Hi20b03    | 13                                                  | bd    | bcd   | acd  | acd   | bd    | bc   | ad    | bd    | acd  | acd   | ---   | bd    | ad    | acd   | bcd  | bcd   | ---   | bd    |
| NH009b     | 13                                                  | ac    | acd   | bcd  | bcd   | bc    | ad   | ac    | ac    | bcd  | bcd   | acd   | ac    | bc    | bcd   | bcd  | bcd   | acd   | bd    |
| AU223486   | 13                                                  | k-    | hhk   | hkk  | hhk   | hh    | k-   | k-    | k-    | hhk  | hkk   | hhk   | hh    | hh    | hkk   | hkk  | hhk   | hhk   | hk    |
| GD147      | 13                                                  | k-    | hhk   | hkk  | hkk   | hh    | hk   | hk    | hh    | hkk  | hkk   | hhk   | hh    | k-    | hhk   | hkk  | hkk   | hhk   | k-    |
| Hi05c06_2  | 13                                                  | hk    | hkk   | hhk  | hhk   | hk    | hk   | kk    | kk    | hhk  | hkk   | hhk   | kk    | h-    | hhk   | hkk  | hhk   | hkk   | h-    |
| Hi07b02_3  | 13                                                  | np    | nnp   | nnp  | nnp   | np    | nn   | nn    | nn    | nnp  | nnp   | nnp   | nn    | np    | nnp   | nnp  | nnp   | nnp   | nn    |
| NZ03c01x_2 | 13                                                  | np    | nnp   | nnp  | nnp   | np    | nn   | nn    | nn    | nnp  | nnp   | nnp   | np    | np    | nnp   | nnp  | nnp   | nnp   | np    |
| CH01g05    | 14                                                  | bcd   | bd    | acd  | bcd   | ad    | ac   | bc    | bd    | bd   | acd   | ad    | bcd   | ac    | bd    | acd  | bd    | acd   | ad    |
| CH03a02    | 14                                                  | acd   | bc    | acd  | bcd   | bd    | ac   | ad    | bc    | bd   | acd   | ac    | bcd   | ac    | bc    | acd  | bc    | acd   | ac    |
| CH03d08    | 14                                                  | acd   | ac    | bcd  | acd   | ad    | bd   | bc    | ac    | ac   | bcd   | bc    | acd   | bd    | ac    | bcd  | ac    | bcd   | bc    |
| CH05g07z_1 | 14                                                  | hhk   | hh    | hhk  | hkk   | k-    | k-   | k-    | k-    | hh   | hhk   | hk    | hkk   | hk    | hh    | hhk  | hh    | hkk   | k-    |

| Markers    | LG | Aneuploid seedlings from the cross of 'Fuji × Gala' |       |       |      |       |       |      |       |       |       |       |       |      |      |       |       |       |       |
|------------|----|-----------------------------------------------------|-------|-------|------|-------|-------|------|-------|-------|-------|-------|-------|------|------|-------|-------|-------|-------|
|            |    | FG20                                                | FG21  | FG22  | FG23 | FG24  | FG25  | FG26 | FG27  | FG28  | FG29  | FG30  | FG31  | FG32 | FG33 | FG34  | FG35  | FG36  | FG37  |
| CH05g07z_2 | 14 | hkk                                                 | kk    | hkk   | hhk  | h-    | h-    | h-   | h-    | kk    | hkk   | hk    | hhk   | hk   | kk   | hkk   | kk    | hhk   | h-    |
| CH02c02a_1 | 15 | bcd                                                 | acd   | acd   | bc   | bc    | bcd   | ad   | acd   | bd    | bcd   | bcd   | bd    | bd   | ac   | acd   | ac    | bc    | bcd   |
| CH02d11    | 15 | bcd                                                 | bcd   | bcd   | ac   | bd    | acd   | ac   | acd   | bd    | acd   | acd   | bd    | ac   | bc   | bcd   | bc    | ac    | bcd   |
| CH03b10    | 15 | acd                                                 | acd   | acd   | bc   | ad    | bcd   | bc   | bcd   | ad    | bcd   | bcd   | ad    | bc   | ac   | acd   | ac    | bc    | acd   |
| Hi04c05    | 15 | acd                                                 | acd   | acd   | bd   | bd    | bcd   | ac   | bcd   | ac    | bcd   | bcd   | ac    | bc   | ad   | acd   | ad    | bd    | acd   |
| Hi06f09    | 15 | ac-                                                 | bc-   | bcd   | ad   | ad    | acd   | bc   | acd   | bc    | acd   | acd   | ac    | ad   | bd   | acd   | bd    | ad    | acd   |
| NZ02b01    | 15 | acd                                                 | acd   | acd   | bd   | bd    | bcd   | ac   | bcd   | ac    | bcd   | bcd   | ac    | bc   | ad   | acd   | ad    | bd    | acd   |
| Hi02g06    | 15 | lll                                                 | lll   | lll   | llm  | llm   | llm   | ll   | llm   | ll    | llm   | lll   | ll    | llm  | ll   | llm   | ll    | llm   | llm   |
| CH02c09    | 15 | np1p2                                               | np1p2 | np1p2 | np   | np    | np1p2 | nn   | np1p2 | nn    | np1p2 | np1p2 | nn    | np   | nn   | np1p2 | nn    | nn    | np1p2 |
| CH02d10a   | 16 | bc                                                  | ac    | bd    | acd  | bcd   | bcd   | bd   | bcd   | bd    | bc    | bcd   | bcd   | bcd  | bc   | bcd   | bc    | acd   | acd   |
| CH04f10    | 16 | bc                                                  | ac    | bd    | acd  | bcd   | acd   | bc   | bcd   | ac    | ad    | acd   | bcd   | acd  | bc   | acd   | bc    | acd   | bcd   |
| CH05a04    | 16 | bc                                                  | ad    | ad    | bcd  | acd   | bcd   | ad   | acd   | bd    | bc    | bcd   | acd   | bcd  | bd   | bcd   | bd    | bcd   | acd   |
| CH05c06_2  | 16 | bc                                                  | ac    | ad    | bcd  | bcd   | bcd   | ad   | acd   | bd    | bc    | bcd   | acd   | bcd  | bd   | acd   | bd    | acd   | acd   |
| Hi01d06y   | 16 | ac                                                  | bc    | ad    | bcd  | acd   | bcd   | ac   | acd   | bc    | bd    | bcd   | acd   | bcd  | ac   | bcd   | ac    | bcd   | acd   |
| Hi04e04    | 16 | ad                                                  | bd    | ac    | acd  | bcd   | acd   | bc   | bcd   | ac    | ad    | acd   | bd    | acd  | ac   | acd   | ac    | bcd   | bcd   |
| CH05b06z_1 | 16 | fg                                                  | eg    | ee    | eef  | ee    | eef   | eef  | efg   | ef    | fg    | efg   | efg   | eef  | ef   | efg   | ef    | efg   | efg   |
| Hi01c11x   | 16 | ee                                                  | ef    | fg    | eeg  | eeg   | eeg   | fg   | efg   | eg    | ee    | efg   | efg   | eeg  | eg   | efg   | eg    | efg   | eeg   |
| CH01h01    | 17 | acd                                                 | bcd   | ac    | ac   | acd   | bd    | ac   | acd   | bcd   | ad    | bc    | bcd   | ad   | bd   | bcd   | bcd   | bcd   | acd   |
| CH04c06y_2 | 17 | bc-                                                 | bc-   | ac    | ad   | c--   | bc    | bc   | c--   | bc-   | ac    | bc    | bc-   | ad   | bd   | c--   | bc-   | bc-   | c--   |
| CH05d08y_1 | 17 | ac-                                                 | ac-   | bd    | bc   | c--   | ad    | ad   | c--   | ac-   | bd    | ad    | ac-   | bc   | ac   | c--   | ac-   | ac-   | c--   |
| CH05g03    | 17 | bcd                                                 | acd   | bc    | bc   | bcd   | ad    | bc   | bcd   | acd   | bd    | ac    | acd   | bd   | ad   | acd   | acd   | acd   | bcd   |
| Hi07b02_2  | 17 | llm                                                 | lll   | llm   | ll   | lll   | llm   | ll   | lll   | lll   | ll    | ll    | lll   | ll   | ll   | llm   | lll   | llm   | llm   |
| CH04c06y_3 | 17 | np1p2                                               | np1p2 | nn    | nn   | np1p2 | np    | np   | np1p2 | np1p2 | np    | np    | np1p2 | nn   | np   | np1p2 | np1p2 | np1p2 | np1p2 |
| GD96       | 17 | np1p2                                               | np1p2 | nn    | nn   | np1p2 | np    | nn   | np1p2 | np1p2 | np    | np    | np1p2 | nn   | np   | np1p2 | np1p2 | np1p2 | np1p2 |
| Hi03c05    | 17 | nnp                                                 | nnp   | nn    | nn   | nnp   | np    | nn   | nnp   | nnp   | np    | np    | nnp   | nn   | np   | nnp   | nnp   | nnp   | nnp   |
| Hi05c06_1  | 17 | nnp                                                 | nnp   | np    | np   | nnp   | nn    | nn   | nnp   | nnp   | np    | nn    | nnp   | np   | nn   | nnp   | nnp   | nnp   | nnp   |
| Hi07b02_1  | 17 | nnp                                                 | nnp   | np    | np   | nnp   | nn    | np   | nnp   | nnp   | nn    | nn    | nnp   | nn   | nn   | nnp   | nnp   | nnp   | nnp   |

Note: '-' represents a null allele, or missing data; 'p1' and 'p2' are con-dominant alleles.
