# Supplementary material for: Molecular Genetic Features of Polyploidization and Aneuploidization Reveal Unique Patterns for Genome Duplication in Diploid Malus
Source: PubMed Central journal article supplement (PMC3254611; doi:10.1371/journal.pone.0029449), 2012-01-10
Supplement: pone.0029449.s005.pdf [file pone.0029449.s005.pdf]

| Markers    | LG | Aneuploid seedlings from the cross of 'Pink Lady × Fuji' |      |      |      |      |      |      |      |      |      |      |      |      |      |      |      |      |      |      |      |      |      |      |      |
|------------|----|----------------------------------------------------------|------|------|------|------|------|------|------|------|------|------|------|------|------|------|------|------|------|------|------|------|------|------|------|
|            |    | PF01                                                     | PF02 | PF03 | PF04 | PF05 | PF06 | PF07 | PF08 | PF09 | PF10 | PF11 | PF12 | PF13 | PF14 | PF15 | PF16 | PF17 | PF18 | PF19 | PF20 | PF21 | PF22 | PF23 | PF24 |
| CH05g08    | 1  | ad                                                       | bd   | ad   | bd   | bc   | bc   | ad   | bc   | bc   | ad   | bd   | ad   | ad   | bd   | bd   | bc   | ad   | bc   | ac   | ad   | bd   | bd   | bc   | ad   |
| Hi07d08    | 1  | bd                                                       | bd   | bd   | ad   | ad   | bc   | bd   | bc   | ac   | ad   | ad   | bd   | ad   | bc   | bc   | ad   | bc   | ac   | bc   | bc   | bc   | ad   | ac   | bc   |
| Hi12c02    | 1  | bc                                                       | ac   | bc   | ac   | ad   | ad   | bc   | ad   | ad   | bc   | ac   | bc   | bc   | ac   | ac   | ad   | bc   | ad   | bd   | bc   | ac   | ac   | ad   | bc   |
| KA4B       | 1  | h-                                                       | hk   | h-   | hk   | kk   | h-   | h-   | kk   | kk   | h-   | hk   | h-   | h-   | h-   | hk   | kk   | h-   | kk   | h-   | h-   | h-   | hk   | h-   | hk   |
| Hi02c07    | 1  | lm                                                       | ll   | lm   | ll   | ll   | ll   | lm   | ll   | ll   | lm   | ll   | lm   | ll   | lm   | ll   | lm   | ll   | lm   | ll   | lm   | ll   | ll   | ll   | lm   |
| Hi02b10    | 1  | np                                                       | nn   | np   | np   | nn   | nn   | np   | nn   | nn   | np   | np   | nn   | np   | np   | nn   | np   | nn   | np   | nn   | np   | np   | nn   | np   | np   |
| CH02a04z   | 2  | ad                                                       | ad   | bc   | ac   | ac   | bcd  | ad   | bd   | ac   | acd  | bd   | acd  | bcd  | acd  | ac   | acd  | bcd  | acd  | bc   | bcd  | ad   | bc   | ad   | acd  |
| CH02c02a_3 | 2  | bd                                                       | bd   | bd   | ad   | ad   | bc-  | bd   | bc   | ac   | ac-  | ad   | bc-  | ac-  | bc-  | bc   | ac-  | bc-  | ac-  | bc   | bc-  | bc   | ad   | ac   | bc-  |
| CH02c06    | 2  | ac                                                       | ac   | bc   | ad   | bc   | bcd  | bd   | bd   | ac   | bcd  | bd   | acd  | acd  | bcd  | bc   | acd  | acd  | bcd  | ac   | bcd  | ac   | ac   | ac   | acd  |
| CH03d01    | 2  | bc                                                       | bc   | bd   | bd   | bc   | ac-  | bd   | ad   | bc   | ac-  | ad   | bc-  | ac-  | bc-  | bc   | bc-  | ac-  | bc-  | ac   | ac-  | bd   | ac   | bd   | bc-  |
| CH05e03    | 2  | ad                                                       | bd   | bc   | bc   | bd   | acd  | bc   | ac   | bd   | bcd  | ac   | bcd  | acd  | bcd  | bd   | bcd  | acd  | bcd  | ad   | acd  | bc   | ad   | bc   | bcd  |
| CN493139   | 2  | ad                                                       | ad   | ad   | bd   | ac   | bcd  | ac   | bc   | ad   | acd  | bc   | acd  | bcd  | acd  | bd   | acd  | bcd  | bcd  | bd   | bcd  | ad   | bc   | bc   | bcd  |
| Hi02a07    | 2  | h-                                                       | h-   | kk   | kk   | hk   | hhk  | kk   | h-   | hk   | hkk  | h-   | hhk  | hkk  | hhk  | hk   | hkk  | hhk  | hkk  | h-   | hhk  | kk   | h-   | kk   | hkk  |
| CH02c02a_2 | 2  | ll                                                       | ll   | ll   | llm  | ll   | llm  | ll   | llm  | ll   | lll  | llm  | llm  | llm  | lll  | ll   | lll  | llm  | llm  | llm  | llm  | ll   | llm  | llm  | llm  |
| CH03d10    | 2  | ll                                                       | ll   | llm  | llm  | ll   | llm  | llm  | llm  | ll   | llm  | llm  | llm  | lll  | lll  | ll   | llm  | lll  | lll  | ll   | llm  | llm  | ll   | llm  | llm  |
| Hi05c06_3  | 2  | np                                                       | np   | nn   | np   | np   | nnp  | nn   | nn   | np   | nnp  | nn   | nnp  | nnp  | nnp  | np   | nnp  | nnp  | nnp  | np   | nnp  | nn   | np   | nn   | nnp  |
| CH03e03    | 3  | bd                                                       | bc   | bc   | bc   | bd   | ad   | ac   | bcd  | acd  | ac   | bcd  | bcd  | bd   | acd  | bd   | bd   | acd  | acd  | bcd  | bd   | acd  | bd   | acd  | bcd  |
| CH03g07    | 3  | bc                                                       | bc   | bd   | bc   | bd   | ad   | ac   | acd  | acd  | ac   | bcd  | bcd  | bd   | acd  | bd   | bd   | bcd  | acd  | acd  | bd   | acd  | ad   | acd  | bcd  |
| HGA8bY     | 3  | ac                                                       | ad   | ad   | bc   | ad   | ad   | ac   | bc-  | bc-  | ac   | bc-  | bc-  | ad   | ac-  | bd   | bd   | bc-  | bc-  | ac-  | ac   | bc-  | bc   | bc-  | ac-  |
| Hi04c10x_1 | 3  | ac                                                       | bc   | ad   | ad   | ac   | bd   | ac   | bc-  | ac-  | bc   | bc-  | ac-  | ad   | bc-  | ad   | ac   | ac-  | bc-  | bc-  | bd   | bc-  | bc   | ac-  | ac-  |
| Hi07e08x   | 3  | ad                                                       | ad   | ac   | ad   | ac   | bc   | bd   | ac-  | bc-  | bd   | ac-  | bc-  | ac   | bc-  | ac   | ac   | bc-  | bc-  | ac-  | ac   | bc-  | ac   | bc-  | ac-  |
| AU223657   | 3  | lm                                                       | ll   | ll   | ll   | ll   | llm  | llm  | lll  | llm  | ll   | lll  | llm  | llm  | ll   | ll   | llm  | llm  | llm  | ll   | lll  | llm  | llm  | llm  | llm  |
| CH02c02b   | 4  | bd                                                       | ad   | ac   | ad   | ad   | bcd  | acd  | bcd  | acd  | ac   | bc   | acd  | bd   | acd  | acd  | acd  | bc   | acd  | bcd  | bc   | acd  | bcd  | acd  | acd  |
| CH05d02    | 4  | ac                                                       | ad   | bc   | ac   | bc   | c--  | c--  | c--  | c--  | bc   | ad   | c--  | --   | c--  | ac-  | ac-  | bd   | ac-  | c--  | bd   | c--  | ac-  | c--  | ac-  |
| GD162      | 4  | ac                                                       | ad   | bc   | ac   | bc   | bcd  | bcd  | bcd  | bcd  | bc   | ad   | bcd  | bd   | bcd  | acd  | --   | bd   | acd  | bcd  | bd   | bcd  | acd  | bcd  | acd  |
| Hi04c10x_3 | 4  | bc                                                       | bd   | ac   | bc   | ac   | ac-  | ac-  | ac-  | ac-  | ad   | bd   | ac-  | bd   | ac-  | bc-  | bc-  | ad   | bc-  | ac-  | ad   | ac-  | bc-  | bc-  | bc-  |
| Hi07b02_4  | 4  | ac                                                       | ad   | bc   | ac   | bc   | bcd  | bcd  | bcd  | bcd  | bd   | bd   | acd  | ad   | bcd  | bcd  | acd  | ad   | bcd  | bcd  | bd   | bcd  | acd  | acd  | acd  |
| CH04e02    | 4  | ee                                                       | fg   | fg   | ee   | fg   | eeg  | efg  | efg  | efg  | ef   | efg  | ef   | efg  | eeg  | eeg  | fg   | eeg  | efg  | fg   | efg  | efg  | efg  | efg  | eeg  |
| CH03a04    | 5  | bd                                                       | ad   | bc   | bc   | ac   | bcd  | ad   | acd  | ac   | acd  | bc   | bcd  | acd  | acd  | ad   | bcd  | bd   | bcd  | bcd  | bcd  | acd  | acd  | acd  | acd  |
| CH03a09    | 5  | ad                                                       | ad   | ac   | bd   | bc   | acd  | bd   | acd  | bc   | bcd  | bcd  | ac   | acd  | bcd  | bcd  | bd   | acd  | ad   | acd  | acd  | acd  | bcd  | bcd  | acd  |
| CH04e03    | 5  | ac                                                       | bc   | ad   | ad   | bc   | bcd  | ac   | bcd  | bc   | bcd  | bcd  | bc   | acd  | bcd  | bcd  | bc   | acd  | ad   | acd  | acd  | acd  | acd  | bcd  | bcd  |
| CH04h02_2  | 5  | ad                                                       | ad   | ac   | bc   | bd   | ac-  | bc   | c--  | bd   | c--  | c--  | ad   | ac-  | c--  | c--  | bc   | ac-  | ac   | ac-  | ac-  | ac-  | c--  | c--  | ac-  |
| CH05e06    | 5  | bc                                                       | bc   | bd   | ad   | ac   | acd  | bc   | acd  | bd   | acd  | acd  | ad   | bcd  | acd  | acd  | ad   | bcd  | bc   | bcd  | bcd  | bcd  | acd  | acd  | acd  |
| Hi04d02    | 5  | ac                                                       | ac   | ad   | ac   | bc   | bcd  | ac   | bcd  | ad   | bcd  | bcd  | bd   | acd  | bcd  | bcd  | bd   | acd  | ac   | acd  | acd  | acd  | bcd  | bcd  | bcd  |

| Markers    | LG | Aneuploid seedlings from the cross of 'Pink Lady × Fuji' |      |       |       |       |       |       |       |       |       |       |      |       |       |       |       |       |       |       |       |       |       |       |       |    |
|------------|----|----------------------------------------------------------|------|-------|-------|-------|-------|-------|-------|-------|-------|-------|------|-------|-------|-------|-------|-------|-------|-------|-------|-------|-------|-------|-------|----|
|            |    | PF01                                                     | PF02 | PF03  | PF04  | PF05  | PF06  | PF07  | PF08  | PF09  | PF10  | PF11  | PF12 | PF13  | PF14  | PF15  | PF16  | PF17  | PF18  | PF19  | PF20  | PF21  | PF22  | PF23  | PF24  |    |
| Hi11a03    | 5  | ac                                                       | bc   | ad    | ad    | bd    | c--   | ad    | c--   | ac    | c--   | c--   | bc   | ac-   | c--   | c--   | bc    | ac-   | ad    | ac-   | ac-   | ac-   | c--   | c--   | c--   |    |
| CH04g09y   | 5  | ef                                                       | ef   | fg    | fg    | ee    | efg   | fg    | eeg   | ee    | eeg   | eeg   | ef   | efg   | eeg   | eeg   | ee    | efg   | fg    | efg   | efg   | efg   | eeg   | eeg   | efg   |    |
| Hi21c08    | 5  | hk                                                       | hk   | h-    | hk    | kk    | hkk   | hk    | hhk   | h-    | hkk   | hhk   | hk   | hkk   | hhk   | hkk   | hk    | hhk   | h-    | hkk   | hhk   | hkk   | hhk   | hkk   | hhk   |    |
| CH02a08z   | 5  | nn                                                       | nn   | np    | np    | nn    | np1p2 | nn    | np1p2 | np    | np1p2 | np1p2 | np   | np1p2 | np1p2 | np1p2 | np    | np1p2 | nn    | np1p2 | np1p2 | np1p2 | np1p2 | np1p2 | np1p2 |    |
| CH04h02_4  | 5  | nn                                                       | nn   | np    | np    | np    | nnp   | np    | nnp   | nn    | nnp   | nnp   | nn   | nnp   | nnp   | nnp   | nn    | nn    | np    | nnp   | nnp   | nnp   | nnp   | nnp   | nnp   |    |
| AJ000761   | 6  | bc                                                       | ac   | ac    | ad    | ad    | bd    | ac    | c--   | bc-   | ac    | bc-   | bc-  | bc-   | c--   | c--   | bc    | bc-   | c--   | bc-   | bc    | c--   | bc-   | ad    | bc    |    |
| CH03c01    | 6  | ad                                                       | ac   | bd    | ad    | ac    | bc    | ac    | ac-   | bc-   | ad    | bc-   | bc-  | bc-   | ac-   | ac-   | bd    | bc-   | ac-   | bc-   | bd    | ac-   | bc-   | ac    | bd    |    |
| CH03d07    | 6  | ad                                                       | ad   | ad    | bc    | bd    | ad    | bc    | acd   | acd   | ad    | acd   | acd  | acd   | acd   | acd   | ac    | acd   | acd   | acd   | ac    | acd   | acd   | bd    | ac    |    |
| CH03d12    | 6  | bd                                                       | bd   | ad    | bd    | bc    | ac    | bd    | bc-   | ac-   | bd    | ac-   | ac-  | ac-   | bc-   | bc-   | ad    | ac-   | bc-   | ac-   | ad    | bc-   | ac-   | bc    | ad    |    |
| Hi01d05    | 6  | fg                                                       | eg   | eg    | fg    | ef    | ee    | fg    | efg   | eeg   | fg    | eeg   | efg  | eeg   | efg   | efg   | eg    | eeg   | efg   | eeg   | eg    | efg   | eeg   | ef    | eg    |    |
| CH05b06z_2 | 7  | ac                                                       | bc   | bc    | bc    | bc    | ac    | ad    | ac    | bd    | bc    | ad    | bc   | ad    | acd   | bc    | bc    | ac    | ac    | ad    | bd    | ac    | ac    | bd    | ad    |    |
| Hi04c10x_2 | 7  | ad                                                       | ad   | bd    | ad    | ad    | bd    | bc    | bd    | ac    | ad    | bc    | ad   | bc    | bc-   | ad    | ad    | bd    | bd    | bc    | ac    | bd    | bd    | ac    | bc    |    |
| CH04e05    | 7  | lm                                                       | ll   | ll    | lm    | lm    | lm    | ll    | lm    | ll    | lm    | ll    | lm   | ll    | llm   | lm    | ll    | lm    | lm    | ll    | ll    | lm    | lm    | ll    | ll    |    |
| Hi05b09    | 7  | lm                                                       | lm   | ll    | ll    | ll    | ll    | lm    | ll    | lm    | ll    | lm    | ll   | lm    | lll   | ll    | ll    | ll    | ll    | lm    | lm    | lm    | ll    | ll    | lm    | lm |
| CH01c06    | 8  | bc                                                       | bd   | ad    | bc    | ac    | ad    | bc    | ad    | bc    | bc    | bd    | bc   | ac    | bd    | bd    | bc    | bd    | ac    | ad    | ac    | bc    | bd    | ad    | ad    |    |
| Hi04b12    | 8  | ac                                                       | ad   | ac    | ad    | bc    | bd    | ac    | bd    | ac    | ac    | ad    | ac   | bc    | ad    | ad    | ac    | ad    | bc    | bd    | bc    | ac    | ad    | bd    | bd    |    |
| Hi23g12    | 8  | bc                                                       | ad   | ad    | ac    | bd    | bc    | ad    | bc    | ad    | ad    | ac    | ad   | bd    | ac    | ac    | ad    | ac    | bd    | bc    | bd    | ad    | ac    | bc    | bc    |    |
| CH02g09    | 8  | lm                                                       | lm   | ll    | lm    | lm    | ll    | lm    | ll    | lm    | lm    | lm    | lm   | lm    | ll    | ll    | lm    | ll    | ll    | ll    | lm    | lm    | ll    | ll    | ll    |    |
| Hi04e05    | 8  | ll                                                       | ll   | ll    | ll    | lm    | ll    | lm    | ll    | lm    | lm    | ll    | lm   | lm    | ll    | lm    | lm    | ll    | lm    | ll    | lm    | ll    | ll    | ll    | ll    |    |
| CH01h02_2  | 9  | bc                                                       | ad   | ac-   | ac-   | ac-   | ac-   | ac-   | ac    | ac-   | bc-   | ac    | bd   | bc-   | ac-   | ac-   | ac-   | ac    | bc-   | ac-   | ac-   | bc    | ac-   | ac-   | bd    |    |
| CH05c07    | 9  | ad                                                       | ac   | acd   | acd   | bcd   | acd   | acd   | bc    | acd   | acd   | ac    | ad   | acd   | bcd   | acd   | acd   | bd    | acd   | acd   | acd   | bc    | bcd   | acd   | bd    |    |
| GD142      | 9  | ac                                                       | bd   | acd   | acd   | acd   | acd   | bcd   | ad    | acd   | bcd   | bd    | bd   | bcd   | acd   | bcd   | bcd   | ac    | bcd   | acd   | bcd   | bc    | acd   | acd   | bc    |    |
| Hi05e07    | 9  | ac                                                       | ad   | ac-   | ac-   | ac-   | ac-   | ac-   | bd    | ac-   | ac-   | bc    | ad   | ac-   | ac-   | ac-   | ac-   | bc    | ac-   | ac-   | ac-   | ac    | ac-   | ac-   | ac    |    |
| NH029a     | 9  | bc                                                       | ad   | bcd   | bcd   | bcd   | bcd   | acd   | bc    | bcd   | acd   | bd    | ac   | acd   | bcd   | bcd   | bcd   | bd    | acd   | bcd   | bcd   | ad    | bcd   | bcd   | ac    |    |
| CH01h02_1  | 9  | hh                                                       | k-   | hk-   | hhk   | hkk   | hhk   | hkk   | hh    | hhk   | hkk   | k-    | hk   | hkk   | hhk   | hhk   | hkk   | k-    | hkk   | hhk   | hkk   | k-    | hhk   | hkk   | hk    |    |
| Hi01d01    | 9  | lm                                                       | ll   | llm   | llm   | llm   | llm   | lll   | lm    | llm   | lll   | lm    | ll   | lll   | llm   | llm   | llm   | lm    | lll   | lll   | lll   | ll    | llm   | llm   | ll    |    |
| CH05d08y_2 | 9  | np                                                       | nn   | np1p2 | np1p2 | np1p2 | np1p2 | np1p2 | np    | np1p2 | np1p2 | np    | nn   | np1p2 | np1p2 | np1p2 | np1p2 | np    | np1p2 | np1p2 | np1p2 | nn    | np1p2 | np1p2 | np    |    |
| CH01f07a   | 10 | bc                                                       | bd   | bd    | bcd   | acd   | bd    | acd   | bc    | acd   | acd   | ac    | ad   | bd    | bc    | acd   | acd   | bcd   | bcd   | acd   | acd   | acd   | bcd   | bcd   | ac    |    |
| CH01f12    | 10 | ac                                                       | bd   | bd    | bcd   | acd   | bd    | bcd   | bc    | acd   | bcd   | bc    | bd   | ad    | bc    | bcd   | bcd   | acd   | bcd   | acd   | acd   | acd   | acd   | bcd   | ac    |    |
| CH02b03b   | 10 | ac                                                       | ad   | ac    | ac-   | bc-   | ac    | bc-   | ad    | bc-   | bc-   | bd    | bc   | ac    | ad    | bc-   | bc-   | ac-   | ac-   | bc-   | bc-   | bc-   | ac-   | ac-   | bd    |    |
| CH02b07    | 10 | bc                                                       | ad   | ac    | acd   | bcd   | bd    | acd   | ad    | bcd   | acd   | ac    | ad   | bd    | ac    | bcd   | bcd   | acd   | bcd   | bcd   | bcd   | bcd   | bcd   | acd   | bc    |    |
| CH02c11    | 10 | ac                                                       | ad   | ac    | ac-   | bc-   | ac    | bc-   | ad    | bc-   | bc-   | bc    | bc   | ac    | ad    | bc-   | bc-   | ac-   | ac-   | bc-   | bc-   | bc-   | ac-   | ac-   | bd    |    |
| MS02a01    | 10 | bd                                                       | bd   | ad    | ac-   | c--   | ac    | c--   | --    | c--   | ac-   | ad    | ac   | bc    | ad    | c--   | c--   | ac-   | bc    | c--   | c--   | c--   | c--   | ac-   | ad    |    |
| MS06g03    | 10 | ac                                                       | ad   | ac    | ac-   | bc-   | ac    | bc-   | ad    | bc-   | bc-   | bd    | bc   | ac    | ad    | bc-   | bc-   | ac-   | ac-   | bc-   | bc-   | bc-   | ac-   | ac-   | bd    |    |

| Markers    | LG | Aneuploid seedlings from the cross of 'Pink Lady × Fuji' |      |      |      |      |      |      |      |      |      |      |      |      |      |      |      |      |      |      |      |      |      |      |      |
|------------|----|----------------------------------------------------------|------|------|------|------|------|------|------|------|------|------|------|------|------|------|------|------|------|------|------|------|------|------|------|
|            |    | PF01                                                     | PF02 | PF03 | PF04 | PF05 | PF06 | PF07 | PF08 | PF09 | PF10 | PF11 | PF12 | PF13 | PF14 | PF15 | PF16 | PF17 | PF18 | PF19 | PF20 | PF21 | PF22 | PF23 | PF24 |
| CH02a10    | 10 | lm                                                       | ll   | lm   | llm  | llm  | ll   | lll  | lm   | lll  | lll  | lm   | ll   | ll   | lm   | llm  | llm  | llm  | lll  | lll  | llm  | llm  | llm  | lll  | lm   |
| CH03d11    | 10 | ll                                                       | ll   | lm   | lll  | lll  | lm   | lll  | ll   | llm  | llm  | ll   | lm   | lm   | ll   | lll  | lll  | llm  | llm  | lll  | lll  | lll  | lll  | llm  | ll   |
| CH04c06y_1 | 10 | lm                                                       | ll   | ll   | lll  | lm   | lm   | llm  | ll   | llm  | lll  | ll   | ll   | lm   | ll   | llm  | llm  | lll  | llm  | llm  | llm  | llm  | llm  | lll  | lm   |
| Hi02d04    | 10 | ll                                                       | ll   | ll   | llm  | lll  | lm   | lll  | lm   | lll  | llm  | lm   | lm   | lm   | lll  | lll  | llm  | lll  | lll  | lll  | lll  | llm  | llm  | llm  |      |
| Hi04f08    | 10 | np                                                       | nn   | np   | nnp  | nnp  | nn   | nnp  | np   | nnp  | nnp  | np   | nn   | np   | np   | nnp  | nnp  | nnp  | nnp  | nnp  | nnp  | nnp  | nnp  | nnp  | np   |
| CH02d08    | 11 | bd                                                       | ac   | bc   | bd   | bcd  | ac   | ac   | bc   | bd   | bc   | bc   | acd  | ad   | bd   | bcd  | ac   | bc   | bc   | bd   | acd  | ad   | bcd  | bc   | bcd  |
| CH04g07    | 11 | ad                                                       | ac   | ad   | bc   | bcd  | bc   | bc   | bc   | bd   | ad   | bc   | bcd  | bd   | ad   | acd  | bd   | bd   | bc   | ad   | acd  | bd   | bcd  | bc   | acd  |
| CH04h02_1  | 11 | bc                                                       | bd   | bd   | bc   | ac-  | bd   | bd   | ad   | ac   | bd   | ad   | c--  | bc   | ac   | ac-  | bd   | ad   | ad   | ac   | c--  | ac   | ac-  | bd   | ac-  |
| Hi06b06    | 11 | ac                                                       | ad   | ac   | bd   | bcd  | bd   | bd   | bd   | bc   | ac   | bd   | bcd  | ac   | ac   | ac   | bc   | bc   | bd   | ac   | ad   | bc   | bcd  | bd   | ad   |
| CH04h02_3  | 11 | nn                                                       | np   | np   | nn   | nnp  | nn   | nn   | np   | np   | np   | np   | nnp  | nn   | np   | nnp  | nn   | np   | nn   | np   | nnp  | nn   | nnp  | np   | nnp  |
| CH01b12y   | 12 | ad                                                       | acd  | bc   | ad   | acd  | ad   | acd  | ac   | bcd  | acd  | acd  | ac   | ad   | bc   | acd  | bcd  | acd  | acd  | acd  | acd  | acd  | bcd  | acd  | acd  |
| CH01f02    | 12 | ac                                                       | acd  | ad   | ac   | acd  | ac   | bcd  | ad   | bcd  | acd  | acd  | ad   | ac   | bd   | acd  | bcd  | acd  | acd  | acd  | acd  | acd  | bcd  | acd  | acd  |
| CH01g12    | 12 | bc                                                       | bcd  | ad   | bc   | bcd  | bc   | bcd  | bd   | acd  | bcd  | bcd  | bd   | bc   | ad   | bcd  | acd  | bcd  | bcd  | bcd  | bcd  | acd  | bcd  | bcd  | bcd  |
| NZ28f04    | 12 | bd                                                       | bcd  | ac   | bd   | bcd  | bd   | acd  | bc   | acd  | bcd  | bcd  | bc   | bd   | ac   | bcd  | acd  | bcd  | bcd  | bcd  | bcd  | acd  | bcd  | bcd  | bcd  |
| CH05d04    | 12 | eg                                                       | efg  | ee   | fg   | efg  | eg   | eef  | ee   | eef  | efg  | efg  | eg   | eg   | ef   | efg  | eef  | efg  | efg  | efg  | efg  | efg  | eef  | eef  | efg  |
| CH05d11    | 12 | ef                                                       | efg  | fg   | ee   | efg  | fg   | eeg  | fg   | eeg  | efg  | efg  | ef   | ef   | ee   | efg  | eeg  | efg  | efg  | efg  | efg  | efg  | eeg  | eeg  | efg  |
| CH03h03z_2 | 12 | nn                                                       | nnp  | np   | nn   | nnp  | np   | nnp  | np   | nnp  | nnp  | nnp  | np   | nn   | np   | nnp  | nnp  | nnp  | nnp  | nnp  | nnp  | nnp  | nnp  | nnp  | nnp  |
| CH03a08    | 13 | bd                                                       | ad   | ac   | acd  | bd   | acd  | acd  | bc   | acd  | ad   | ac   | bd   | bcd  | bc   | acd  | bcd  | ac   | acd  | bcd  | ad   | bd   | bc   | bcd  | acd  |
| CH03h03z_1 | 13 | ad                                                       | ac   | bc   | c--  | bc   | c--  | c--  | bc   | bc-  | ac   | ad   | bc   | bc-  | bd   | c--  | bc-  | ad   | c--  | bc-  | ac   | bc   | bd   | bc-  | c--  |
| CH05f04    | 13 | ac                                                       | ad   | ac   | ac-  | bd   | ac-  | ac-  | bc   | ac-  | ad   | ac   | ad   | ac-  | bc   | ac-  | ac-  | bd   | ac-  | ac-  | ac   | ad   | ad   | ac-  | ac-  |
| CH05h05    | 13 | bc                                                       | bd   | ac   | acd  | bc   | acd  | acd  | bd   | bcd  | ac   | ad   | ac   | acd  | bd   | bcd  | bcd  | bc   | acd  | bcd  | ad   | ac   | ac   | bcd  | bcd  |
| Hi05c06_2  | 13 | ac                                                       | bd   | bc   | bcd  | bd   | acd  | bcd  | ac   | bcd  | bd   | ac   | bd   | acd  | bc   | acd  | bcd  | ac   | acd  | acd  | ad   | bd   | ac   | acd  | bd   |
| Hi20b03    | 13 | bc                                                       | bd   | ad   | bcd  | ad   | bcd  | acd  | ac   | acd  | ad   | bc   | ad   | acd  | ad   | bcd  | acd  | bc   | bcd  | acd  | --   | ad   | bc   | acd  | bcd  |
| NH009b     | 13 | bc                                                       | bc   | ad   | acd  | bc   | acd  | bcd  | bd   | bcd  | ac   | ad   | bc   | bcd  | bc   | acd  | bcd  | ad   | acd  | bcd  | ac   | bc   | ad   | bcd  | acd  |
| GD147      | 13 | hk                                                       | h-   | hk   | hkk  | kk   | hkk  | hkk  | hk   | hkk  | kk   | kk   | h-   | hkk  | h-   | hkk  | hkk  | h-   | hkk  | hkk  | kk   | h-   | hk   | hkk  | hkk  |
| Hi03e04    | 13 | kk                                                       | h-   | h-   | hkk  | kk   | hkk  | hkk  | hk   | hkk  | h-   | h-   | kk   | hkk  | kk   | hkk  | hkk  | h-   | hkk  | hkk  | h-   | kk   | hk   | hkk  | hkk  |
| Hi07b02_3  | 13 | ll                                                       | ll   | lm   | lll  | ll   | lll  | lll  | lm   | llm  | lm   | ll   | lm   | llm  | lm   | lll  | llm  | lm   | llm  | llm  | ll   | ll   | ll   | llm  | llm  |
| NZ03c01x_2 | 13 | lm                                                       | lm   | lm   | llm  | ll   | llm  | llm  | ll   | lll  | lm   | ll   | ll   | lll  | ll   | llm  | lll  | lm   | llm  | llm  | lm   | lm   | ll   | lll  | lll  |
| AU223486   | 13 | nn                                                       | nn   | np   | nnp  | np   | nnp  | nnp  | nn   | nnp  | np   | np   | nn   | nnp  | nn   | nnp  | nnp  | nn   | nnp  | nnp  | np   | np   | np   | nnp  | nnp  |
| CH05c06_1  | 13 | nn                                                       | nn   | np   | nnp  | np   | nnp  | nnp  | nn   | nnp  | np   | np   | nn   | nnp  | nn   | nnp  | nnp  | nn   | nnp  | nnp  | np   | np   | np   | nnp  | nnp  |
| CH01g05    | 14 | ac                                                       | bc   | ad   | acd  | ad   | bcd  | ad   | acd  | ad   | ad   | bc   | bc   | bc   | bd   | ac   | ad   | ac   | ac   | ac   | ad   | ad   | ac   | bc   | acd  |
| CH03a02    | 14 | ac                                                       | ac   | ad   | acd  | ac   | bcd  | ac   | acd  | ac   | bd   | bd   | bd   | ad   | bc   | ac   | ac   | ac   | ac   | ac   | ac   | ad   | ad   | ad   | acd  |
| CH03d08    | 14 | bc                                                       | bc   | bd   | bcd  | bc   | acd  | bc   | bcd  | bc   | ad   | ad   | ad   | ad   | ac   | bd   | bc   | bd   | bd   | bd   | bc   | bc   | bd   | ad   | bcd  |
| CH05g07z_1 | 14 | k-                                                       | hk   | hk   | hkk  | hk   | hkk  | hh   | hkk  | k-   | hk   | k-   | k-   | hk   | hh   | k-   | k-   | hk   | hk   | hk   | hk   | k-   | k-   | k-   | hkk  |

| Markers    | LG | Aneuploid seedlings from the cross of 'Pink Lady × Fuji' |      |      |       |       |      |       |       |      |       |       |       |      |      |      |       |       |      |       |       |       |       |       |       |
|------------|----|----------------------------------------------------------|------|------|-------|-------|------|-------|-------|------|-------|-------|-------|------|------|------|-------|-------|------|-------|-------|-------|-------|-------|-------|
|            |    | PF01                                                     | PF02 | PF03 | PF04  | PF05  | PF06 | PF07  | PF08  | PF09 | PF10  | PF11  | PF12  | PF13 | PF14 | PF15 | PF16  | PF17  | PF18 | PF19  | PF20  | PF21  | PF22  | PF23  | PF24  |
| CH05g07z_2 | 14 | hk                                                       | hk   | h-   | hkk   | hk    | hkh  | kk    | hkk   | h-   | hk    | h-    | h-    | hk   | kk   | h-   | h-    | hk    | hk   | hk    | hk    | h-    | h-    | h-    | hkk   |
| CH02c02a_1 | 15 | bd                                                       | ad   | ad   | ac    | c--   | bd   | ac-   | ac-   | ad   | ad    | c--   | ac-   | bc   | ac   | ad   | ac-   | bc    | ad   | ad    | c--   | ac-   | c--   | c--   | ac    |
| CH02d11    | 15 | bd                                                       | ac   | ad   | bd    | acd   | ad   | acd   | bcd   | bd   | bc    | bcd   | bcd   | ac   | bc   | bd   | acd   | bc    | bd   | bc    | acd   | bcd   | acd   | bcd   | ac    |
| CH03b10    | 15 | ac                                                       | bd   | bc   | bc    | acd   | ac   | acd   | bcd   | bc   | ad    | bcd   | bcd   | ad   | bd   | bc   | acd   | bd    | bc   | bd    | acd   | bcd   | acd   | bcd   | ad    |
| Hi04c05    | 15 | ac                                                       | ad   | ac   | ac    | c--   | bd   | c--   | ac-   | ad   | bc    | ac-   | ac-   | bc   | ac   | ad   | c--   | ac    | ad   | ac    | c--   | ac-   | c--   | ac-   | bc    |
| NZ02b01    | 15 | bc                                                       | ad   | ac   | ac    | bc-   | bc   | bc-   | ac-   | ac   | bd    | ac-   | ac-   | bd   | ad   | ac   | bc-   | ad    | ac   | ad    | bc-   | ac-   | bc-   | ac-   | bd    |
| CH02c09    | 15 | ll                                                       | lm   | lm   | lm    | lll   | ll   | llm   | llm   | lm   | ll    | llm   | lll   | ll   | lm   | lm   | llm   | lm    | ll   | lm    | lll   | llm   | llm   | llm   | lm    |
| Hi02g06    | 15 | nn                                                       | nn   | nn   | np    | np1p2 | np   | np1p2 | np1p2 | nn   | nn    | np1p2 | np1p2 | np   | np   | np   | np1p2 | np    | np   | nn    | np1p  | np1p2 | np1p2 | np1p2 | nn    |
| Hi06f09    | 15 | nn                                                       | np   | nn   | nn    | np1p2 | nn   | np1p2 | np1p2 | np   | nn    | np1p2 | np1p2 | nn   | nn   | nn   | np1p2 | np    | nn   | np    | np1p  | np1p2 | np1p2 | np1p2 | nn    |
| CH02d10a   | 16 | bc                                                       | bc   | ad   | bc-   | bc    | bc   | bc    | bd    | ad   | bc-   | bc-   | bc-   | bc-  | ac-  | bd   | ad    | bc-   | bd   | bc    | bc-   | ac-   | bc-   | bc-   | bc-   |
| CH05a04    | 16 | ac                                                       | bc   | bc   | acd   | ad    | bd   | bc    | ad    | bd   | bcd   | acd   | bcd   | acd  | acd  | ac   | bd    | bcd   | ad   | ac    | bcd   | bcd   | acd   | acd   | acd   |
| CH05b06z_1 | 16 | bd                                                       | bd   | ad   | bcd   | bc    | ad   | ad    | bc    | ac   | acd   | acd   | acd   | bcd  | bcd  | bc   | ac    | acd   | bc   | bd    | acd   | acd   | bcd   | bcd   | bcd   |
| CH05c06_2  | 16 | ad                                                       | bd   | ac   | acd   | ad    | bd   | ad    | bd    | bd   | acd   | acd   | bcd   | bcd  | bcd  | bc   | ad    | acd   | bd   | bd    | bcd   | bcd   | acd   | acd   | bcd   |
| Hi01c11x   | 16 | fg                                                       | eg   | ef   | eeg   | fg    | eg   | eg    | eg    | eg   | eeg   | efg   | eeg   | eeg  | eeg  | eg   | fg    | efg   | eg   | eg    | efg   | efg   | efg   | efg   | eeg   |
| Hi01d06y   | 16 | eg                                                       | fg   | ee   | efg   | eg    | fg   | eg    | fg    | fg   | eeg   | eeg   | efg   | efg  | efg  | fg   | eg    | eeg   | fg   | fg    | eeg   | eeg   | eeg   | eeg   | efg   |
| Hi04e04    | 16 | fg                                                       | eg   | ef   | eeg   | fg    | eg   | eg    | eg    | eg   | efg   | efg   | eeg   | eeg  | eeg  | eg   | fg    | efg   | eg   | eg    | efg   | efg   | efg   | efg   | eeg   |
| CH04f10    | 16 | nn                                                       | nn   | np   | nnp   | nn    | np   | np    | nn    | np   | nnp   | nnp   | nnp   | nnp  | nnp  | nn   | np    | nnp   | nn   | nn    | nnp   | nnp   | nnp   | nnp   | nnp   |
| CH01h01    | 17 | b                                                        | bd   | bd   | bcd   | acd   | bd   | bd    | acd   | bd   | bcd   | bcd   | bcd   | bcd  | ac   | bc   | bcd   | acd   | bd   | bcd   | bcd   | acd   | acd   | bcd   | acd   |
| CH05d08y_1 | 17 | a                                                        | bd   | ac   | c--   | c--   | bc   | ac    | c--   | ac   | ac-   | ac-   | c--   | ac   | ad   | ac   | c--   | ac-   | bc   | c--   | ac-   | c--   | ac-   | ac-   | c--   |
| CH04c06y_3 | 17 | m                                                        | lm   | lm   | llm   | llm   | lm   | ll    | llm   | ll   | lll   | lll   | lll   | lll  | lm   | ll   | lll   | llm   | ll   | llm   | lll   | lll   | lll   | llm   | llm   |
| GD96       | 17 | l                                                        | lm   | ll   | llm   | llm   | ll   | ll    | llm   | ll   | llm   | lll   | llm   | lll  | lm   | ll   | llm   | llm   | ll   | llm   | llm   | lll   | llm   | llm   | llm   |
| Hi03c05    | 17 | l                                                        | lm   | lm   | llm   | llm   | ll   | ll    | llm   | ll   | lll   | lll   | llm   | lll  | lm   | ll   | llm   | llm   | lm   | lll   | lll   | llm   | lll   | lll   | llm   |
| Hi05c06_1  | 17 | m                                                        | ll   | lm   | lll   | lll   | lm   | lm    | lll   | lm   | llm   | llm   | lll   | llm  | lm   | lm   | lll   | llm   | ll   | lll   | llm   | lll   | llm   | llm   | lll   |
| Hi07b02_1  | 17 | l                                                        | lm   | ll   | llm   | lll   | lm   | ll    | llm   | ll   | llm   | lll   | llm   | lll  | lm   | ll   | llm   | llm   | lm   | llm   | llm   | llm   | llm   | llm   | llm   |
| CH04c06y_2 | 17 | n                                                        | np   | np   | nnp   | nnp   | nn   | np    | nnp   | np   | nnp   | nnp   | nnp   | nnp  | nn   | np   | nnp   | nnp   | np   | nnp   | nnp   | nnp   | nnp   | nnp   | nnp   |
| CH05g03    | 17 | n                                                        | np   | nn   | np1p2 | np1p2 | nn   | nn    | np1p2 | nn   | np1p2 | np1p2 | np1p2 | np1p | nn   | nn   | np1p2 | np1p2 | np   | np1p2 | np1p2 | np1p2 | np1p2 | np1p2 | np1p2 |
| Hi07b02_2  | 17 | n                                                        | np   | nn   | nnp   | nnp   | np   | nn    | nnp   | nn   | nnp   | nnp   | nnp   | nnp  | np   | np   | nnp   | nnp   | np   | nnp   | nnp   | nnp   | nnp   | nnp   | nnp   |

Note: '-' represents a null allele, or missing data; 'p1' and 'p2' are con-dominant alleles.
