# Supplementary material for: Molecular Genetic Features of Polyploidization and Aneuploidization Reveal Unique Patterns for Genome Duplication in Diploid Malus
Source: PubMed Central journal article supplement (PMC3254611; doi:10.1371/journal.pone.0029449), 2012-01-10
Supplement: pone.0029449.s006.pdf [file pone.0029449.s006.pdf]

| Markers    | LG | Aneuploid seedlings from the cross of 'M 26 × Fu 2' |        |        |        |        |        |        |        |        |        |        |        |        |        |        |        |        |        |        |        |        |        |        |
|------------|----|-----------------------------------------------------|--------|--------|--------|--------|--------|--------|--------|--------|--------|--------|--------|--------|--------|--------|--------|--------|--------|--------|--------|--------|--------|--------|
|            |    | M26F01                                              | M26F02 | M26F03 | M26F04 | M26F05 | M26F06 | M26F07 | M26F08 | M26F09 | M26F10 | M26F11 | M26F12 | M26F13 | M26F14 | M26F15 | M26F16 | M26F17 | M26F18 | M26F19 | M26F20 | M26F21 | M26F22 | M26F23 |
| CH05g08    | 1  | bd                                                  | bc     | bd     | bc     | ad     | bc     | ad     | bd     | bd     | bd     | bc     | bc     | bc     | ac     | bc     | ad     | bc     | bc     | bc     | ac     | bc     | ac     | bc     |
| Hi02b10    | 1  | ac                                                  | bd     | ac     | ac     | ad     | ad     | bd     | ad     | ad     | ad     | ac     | ac     | ac     | bc     | ac     | bd     | ac     | ad     | ac     | bc     | ac     | bc     | ac     |
| Hi07d08    | 1  | bc                                                  | ad     | bc     | bd     | bd     | ad     | ad     | ad     | bc     | bc     | bd     | ad     | bc     | ad     | bd     | ac     | bd     | bd     | bd     | bd     | bd     | bd     | bd     |
| Hi12c02    | 1  | bc                                                  | ad     | ad     | ac     | ac     | bc     | bc     | bc     | ad     | ad     | ac     | bc     | ad     | bc     | ac     | bd     | ac     | ac     | ac     | ac     | ac     | ac     | ac     |
| KA4B       | 1  | ad                                                  | ac     | ac     | ad     | bc     | ad     | bc     | ac     | ac     | ac     | ad     | ad     | ad     | bd     | ad     | bc     | ad     | ad     | ad     | bd     | ad     | bd     | ad     |
| Hi02c07    | 1  | kk                                                  | hk     | hk     | kk     | h-     | kk     | h-     | h-     | h-     | hk     | kk     | kk     | kk     | h-     | kk     | h-     | kk     | kk     | kk     | h-     | kk     | h-     | kk     |
| CH02a04z   | 2  | ad                                                  | bc     | bcd    | bd     | ad     | bcd    | acd    | ac     | ad     | acd    | ad     | acd    | ac     | acd    | ad     | acd    | acd    | acd    | bcd    | ad     | bc     | acd    | acd    |
| CH02c06    | 2  | bc                                                  | ad     | bcd    | ad     | ad     | acd    | acd    | ac     | bc     | bcd    | bd     | bcd    | ad     | bcd    | bd     | bcd    | acd    | acd    | bcd    | bc     | ac     | acd    | acd    |
| CH03d01    | 2  | ac                                                  | bd     | acd    | ad     | bd     | acd    | bcd    | bc     | bd     | bcd    | bd     | bcd    | bc     | acd    | bd     | bcd    | bcd    | bcd    | acd    | bd     | ac     | bcd    | bcd    |
| CH05e03    | 2  | ad                                                  | bc     | acd    | ac     | bc     | acd    | bcd    | bd     | bc     | bcd    | bc     | bcd    | bd     | bcd    | bc     | bcd    | bcd    | bcd    | acd    | bc     | ad     | bcd    | bcd    |
| CN493139   | 2  | bd                                                  | ac     | acd    | bc     | bc     | bcd    | bcd    | ad     | ac     | acd    | bc     | acd    | ac     | acd    | ac     | acd    | acd    | acd    | acd    | ac     | bd     | bcd    | acd    |
| Hi02a07    | 2  | bd                                                  | ac     | bcd    | bc     | ac     | bcd    | acd    | ad     | ac     | acd    | ac     | acd    | ad     | acd    | ac     | acd    | acd    | acd    | bcd    | ac     | bd     | acd    | acd    |
| CH03d10    | 2  | h-                                                  | kk     | hkk    | h-     | kk     | hkk    | hkk    | hk     | kk     | hkk    | kk     | hkk    | h-     | hkk    | kk     | hkk    | hkk    | hkk    | hkk    | kk     | h-     | hkk    | hkk    |
| CH02c02a_2 | 2  | lm                                                  | ll     | lll    | lm     | lm     | llm    | llm    | ll     | ll     | lll    | lm     | lll    | ll     | lll    | lm     | llm    | llm    | lll    | lll    | lm     | lm     | llm    | llm    |
| CH02c02a_3 | 2  | np                                                  | nn     | np1p2  | nn     | nn     | np1p   | np1p2  | nn     | nn     | np1p2  | nn     | np1p   | nn     | np1p2  | nn     | np1p2  | np1p   | np1p2  | np1p2  | nn     | np     | np1p2  | np1p2  |
| Hi05c06_3  | 2  | np                                                  | nn     | nnp    | nn     | nn     | nnp    | nnp    | np     | nn     | nnp    | nn     | nnp    | np     | nnp    | nn     | nnp    | nnp    | nnp    | nnp    | nn     | np     | nnp    | nnp    |
| AU223657   | 3  | bd                                                  | acd    | bc     | bcd    | bcd    | bd     | acd    | bcd    | bd     | bcd    | ac     | acd    | ac     | ad     | bcd    | bd     | bc     | bcd    | ad     | bcd    | bc     | bc     | acd    |
| CH03e03    | 3  | bd                                                  | acd    | bd     | bcd    | bcd    | bd     | acd    | acd    | bd     | acd    | ad     | acd    | bc     | ad     | bcd    | bd     | bc     | bcd    | ad     | bcd    | ac     | ad     | acd    |
| Hi07e08x   | 3  | ac                                                  | bcd    | ac     | acd    | acd    | ac     | bcd    | bcd    | ac     | bcd    | bc     | bcd    | ad     | bc     | acd    | ac     | ad     | acd    | bc     | acd    | bd     | bc     | bcd    |
| CH03g07    | 3  | ee                                                  | efg    | ee     | eeg    | eeg    | fg     | eeg    | eeg    | eg     | eeg    | ee     | eeg    | fg     | fg     | eeg    | eg     | ef     | efg    | fg     | eeg    | eg     | ef     | efg    |
| HGA8bY     | 3  | np                                                  | np1p2  | nn     | np1p   | np1p2  | np     | np1p2  | np1p   | nn     | np1p2  | nn     | np1p   | np     | np     | np1p2  | nn     | np     | np1p2  | np     | np1p   | nn     | np     | np1p2  |
| Hi04c10x_1 | 3  | ll                                                  | ll     | llm    | llm    | llm    | ll     | llm    | llm    | lm     | llm    | lm     | llm    | ll     | ll     | llm    | lm     | ll     | lll    | ll     | llm    | lm     | ll     | lll    |
| CH02c02b   | 4  | bcd                                                 | ac     | bc     | bcd    | acd    | bc     | ad     | ad     | acd    | ad     | acd    | acd    | acd    | ac     | ac     | ac     | acd    | acd    | bcd    | ac     | bd     | ac     | acd    |
| CH04e02    | 4  | acd                                                 | ad     | bc     | acd    | bcd    | ac     | ad     | bc     | acd    | ad     | bcd    | acd    | acd    | bc     | bd     | ac     | acd    | acd    | bcd    | bc     | bc     | ac     | --     |
| GD162      | 4  | bcd                                                 | ad     | ac     | bcd    | acd    | bd     | bc     | ad     | bcd    | bc     | acd    | bcd    | bcd    | ad     | ac     | bd     | bcd    | bcd    | acd    | ad     | ad     | bd     | bcd    |
| Hi04c10x_3 | 4  | ac-                                                 | bd     | ac     | ac-    | bc-    | ad     | ac     | bd     | ac-    | ac     | bc-    | ac-    | ac-    | bd     | bc     | ac     | ac-    | ac-    | bc-    | bd     | bd     | ad     | ac-    |
| CH05d02    | 4  | efg                                                 | eg     | ef     | efg    | efg    | ee     | ee     | ef     | efg    | eg     | eef    | efg    | efg    | ef     | fg     | ee     | efg    | eef    | eef    | fg     | ef     | eg     | efg    |
| Hi07b02_4  | 4  | efg                                                 | eg     | ef     | efg    | efg    | fg     | fg     | eg     | efg    | ef     | eeg    | efg    | efg    | eg     | ee     | fg     | efg    | eeg    | eeg    | ee     | eg     | ef     | efg    |
| CH03a04    | 5  | ad                                                  | bd     | bd     | bcd    | bd     | bd     | bcd    | bc     | acd    | bcd    | bd     | bcd    | bcd    | ad     | bcd    | bcd    | bcd    | bc     | bcd    | bd     | acd    | bc     | bcd    |
| CH03a09    | 5  | bc                                                  | ac     | ac     | acd    | ac     | ac     | acd    | ad     | bcd    | acd    | ac     | acd    | acd    | bc     | acd    | acd    | acd    | ad     | acd    | ac     | bcd    | ad     | acd    |
| CH04g09y   | 5  | bc                                                  | ac     | ad     | bcd    | ad     | bc     | bcd    | bd     | bcd    | bcd    | bc     | bcd    | acd    | ac     | bcd    | acd    | bcd    | bd     | acd    | bc     | acd    | ac     | bcd    |
| CH05e06    | 5  | ac                                                  | bd     | ad     | bcd    | bc     | bd     | bcd    | bc     | bcd    | bcd    | bd     | bcd    | acd    | ad     | bcd    | acd    | bcd    | bc     | acd    | bd     | bcd    | ad     | bcd    |
| Hi04d02    | 5  | ac                                                  | bd     | bc     | bcd    | bd     | ac     | acd    | ad     | bcd    | acd    | ac     | acd    | bcd    | bc     | acd    | bcd    | acd    | ad     | bcd    | ac     | bcd    | bc     | acd    |
| Hi11a03    | 5  | ad                                                  | bc     | bd     | acd    | ac     | ad     | acd    | ac     | acd    | acd    | ad     | acd    | bcd    | bd     | acd    | bcd    | acd    | ac     | bcd    | ad     | acd    | bd     | acd    |

| Markers    | LG | Aneuploid seedlings from the cross of 'M 26 × Fu 2' |        |        |        |        |        |        |        |        |        |        |        |        |        |        |        |        |        |        |        |        |        |        |
|------------|----|-----------------------------------------------------|--------|--------|--------|--------|--------|--------|--------|--------|--------|--------|--------|--------|--------|--------|--------|--------|--------|--------|--------|--------|--------|--------|
|            |    | M26F01                                              | M26F02 | M26F03 | M26F04 | M26F05 | M26F06 | M26F07 | M26F08 | M26F09 | M26F10 | M26F11 | M26F12 | M26F13 | M26F14 | M26F15 | M26F16 | M26F17 | M26F18 | M26F19 | M26F20 | M26F21 | M26F22 | M26F23 |
| CH04e03    | 5  | fg                                                  | ef     | fg     | eeg    | ee     | fg     | eeg    | eg     | eeg    | eeg    | eg     | eeg    | efg    | fg     | eeg    | efg    | eeg    | ee     | efg    | eg     | eeg    | fg     | eeg    |
| CH04h02_2  | 5  | hh                                                  | hh     | hh     | hkh    | hk     | hk     | hkk    | hk     | hkh    | kk     | hk     | hk-    | hkk    | hh     | hkh    | hkk    | hkh    | hk     | hkk    | hk     | hkk    | hh     | hkk    |
| CH04h02_4  | 5  | h-                                                  | kk     | h-     | hk-    | kk     | h-     | hk-    | h-     | hk-    | h-     | hh     | hkk    | hk-    | h-     | hk-    | hk-    | hk-    | kk     | hk-    | h-     | hk-    | h-     | hk-    |
| Hi21c08    | 5  | kk                                                  | kk     | kk     | hkk    | hk     | hk     | hkh    | hk     | hkk    | hkh    | hk     | hkk    | hkh    | kk     | hkk    | hkh    | hkk    | hk     | hkh    | hk     | hkk    | kk     | hkh    |
| CH02a08z   | 5  | np                                                  | nn     | np     | np1p2  | nn     | np     | np1p2  | np     | np1p2  | np1p2  | np     | np1p   | np1p2  | np     | np1p2  | np1p2  | np1p2  | nn     | np1p2  | np     | np1p2  | np     | np1p2  |
| AJ000761   | 6  | ac                                                  | ac     | bd     | acd    | acd    | ac     | bcd    | ad     | bcd    | bd     | ac     | bcd    | acd    | acd    | acd    | bcd    | bcd    | bcd    | bcd    | bd     | bcd    | bd     | ad     |
| CH03d07    | 6  | ad                                                  | bc     | bc     | bcd    | bcd    | bc     | acd    | bd     | bcd    | ad     | bc     | acd    | bcd    | bcd    | bcd    | acd    | acd    | acd    | bcd    | ad     | acd    | ad     | bd     |
| CH03d12    | 6  | ac                                                  | bd     | bd     | bcd    | bcd    | bd     | acd    | bc     | acd    | ac     | bd     | acd    | bcd    | bcd    | bcd    | acd    | acd    | acd    | acd    | ac     | acd    | ac     | bc     |
| CH03c01    | 6  | eg                                                  | ef     | ee     | eeg    | efg    | eg     | eeg    | ef     | efg    | ef     | ef     | efg    | efg    | eeg    | efg    | eeg    | eeg    | efg    | eeg    | ee     | eeg    | ef     | fg     |
| Hi01d05    | 6  | fg                                                  | eg     | fg     | efg    | efg    | fg     | eeg    | ef     | eeg    | ee     | ef     | eeg    | efg    | efg    | efg    | efg    | eeg    | eeg    | eeg    | ef     | eeg    | ee     | ef     |
| Hi04c10x_2 | 7  | ad                                                  | bc     | bd     | bc     | ac     | bd     | ac     | ad     | ac     | ad     | bc     | bc     | bd     | acd    | bd     | bd     | ad     | ad     | bc     | ad     | acd    | acd    | ad     |
| Hi05b09    | 7  | ac                                                  | bc     | ad     | ad     | bd     | ac     | bd     | bc     | bd     | bc     | ad     | ad     | ac     | c--    | ac     | ac     | bd     | bc     | bc     | ad     | c--    | c--    | bc     |
| CH04e05    | 7  | lm                                                  | ll     | lm     | lm     | ll     | lm     | ll     | ll     | ll     | ll     | lm     | lm     | lm     | lll    | lm     | lm     | ll     | ll     | ll     | lm     | lll    | lll    | ll     |
| CH05b06z_2 | 7  | np                                                  | nn     | nn     | nn     | nn     | np     | np     | np     | nn     | nn     | nn     | np     | nnp    | nn     | np     | nn     | nn     | nn     | nn     | nn     | nnp    | nnp    | np     |
| CH01c06    | 8  | bd                                                  | ac     | ac     | ad     | bd     | bc     | bc     | bc     | bd     | ac     | ac     | bd     | ad     | bc     | ac     | ac     | bc     | bc     | bc     | bd     | ac     | ad     | bd     |
| CH02g09    | 8  | bc                                                  | ad     | ad     | ac     | bc     | bd     | bd     | bd     | bc     | ad     | ad     | bc     | ac     | bd     | ad     | ad     | bd     | bd     | bd     | bd     | ad     | ac     | bc     |
| Hi04b12    | 8  | bc                                                  | ad     | bc     | bd     | ad     | ac     | ac     | ac     | ad     | bc     | bc     | ad     | bd     | ac     | bc     | bc     | ac     | ac     | ac     | ad     | bc     | bd     | ad     |
| Hi23g12    | 8  | bd                                                  | ac     | bd     | bc     | ac     | ad     | ad     | ad     | ac     | bd     | bd     | ac     | bc     | ad     | bd     | bd     | ad     | ad     | ad     | ac     | bd     | bc     | ac     |
| Hi04e05    | 8  | lm                                                  | ll     | lm     | lm     | ll     | lm     | ll     | ll     | ll     | lm     | lm     | ll     | lm     | ll     | lm     | lm     | ll     | ll     | lm     | ll     | lm     | lm     | ll     |
| CH01h02_1  | 9  | ac                                                  | acd    | bcd    | bc     | bcd    | bd     | ac     | acd    | acd    | bcd    | bcd    | bd     | acd    | bcd    | acd    | bcd    | bcd    | ad     | acd    | acd    | bcd    | acd    | acd    |
| CH01h02_2  | 9  | ac                                                  | ac-    | bc-    | bd     | bc-    | bc     | ad     | ac-    | ac-    | bc-    | bc-    | bc     | ac-    | bc-    | ac-    | bc-    | bc-    | ac     | ac-    | ac-    | bc-    | ac-    | ac-    |
| CH05c07    | 9  | ac                                                  | acd    | bcd    | bc     | acd    | ad     | bd     | acd    | bcd    | acd    | bcd    | ad     | bcd    | bcd    | acd    | bcd    | bcd    | bc     | bcd    | bcd    | bcd    | acd    | acd    |
| GD142      | 9  | bc                                                  | acd    | bcd    | bd     | bcd    | bc     | ad     | acd    | acd    | acd    | acd    | bc     | acd    | bcd    | bcd    | acd    | acd    | ad     | acd    | acd    | bcd    | acd    | acd    |
| Hi05e07    | 9  | bc                                                  | bcd    | acd    | ac     | bcd    | ad     | bc     | bcd    | bcd    | acd    | acd    | ad     | bcd    | acd    | bcd    | acd    | acd    | bd     | bcd    | acd    | acd    | bcd    | bcd    |
| NH029a     | 9  | bd                                                  | bcd    | acd    | ad     | acd    | ac     | bd     | bcd    | bcd    | acd    | acd    | ac     | bcd    | acd    | bcd    | acd    | acd    | bc     | bcd    | bcd    | acd    | bcd    | bcd    |
| CH05d08y_2 | 9  | fg                                                  | efg    | eef    | ee     | eeg    | eg     | ef     | efg    | efg    | efg    | eeg    | eg     | eeg    | eeg    | eeg    | efg    | efg    | ef     | efg    | efg    | eeg    | efg    | efg    |
| Hi01d01    | 9  | fg                                                  | efg    | eeg    | ee     | eeg    | eg     | ef     | efg    | eeg    | efg    | eeg    | eg     | efg    | eeg    | efg    | eeg    | efg    | ef     | eef    | efg    | eeg    | efg    | efg    |
| CH01f07a   | 10 | bc                                                  | ac     | acd    | bd     | acd    | acd    | ad     | acd    | bc     | bc     | acd    | bc     | bcd    | bcd    | ac     | ac     | bcd    | acd    | bcd    | bcd    | acd    | acd    | ac     |
| CH01f12    | 10 | bd                                                  | bd     | bcd    | ad     | bcd    | bcd    | ad     | acd    | bc     | ac     | acd    | bd     | bcd    | bcd    | ad     | bd     | bcd    | bcd    | bcd    | acd    | acd    | acd    | ac     |
| CH02a10    | 10 | bd                                                  | ad     | bcd    | ac     | acd    | bcd    | bc     | bcd    | ad     | ad     | bcd    | ad     | acd    | acd    | bd     | bd     | acd    | bcd    | bcd    | acd    | bcd    | bcd    | bd     |
| CH02b03b   | 10 | bc                                                  | ac     | bcd    | ad     | bcd    | bcd    | bd     | bcd    | ac     | ac     | bcd    | ac     | acd    | acd    | bc     | bc     | acd    | bcd    | acd    | acd    | bcd    | bcd    | bc     |
| CH02b07    | 10 | bd                                                  | ad     | acd    | bd     | bcd    | bcd    | bd     | bcd    | bc     | bc     | bcd    | ad     | acd    | acd    | ad     | ad     | acd    | acd    | acd    | bcd    | bcd    | bcd    | bc     |
| CH03d11    | 10 | bc                                                  | bd     | c--    | ad     | c--    | c--    | ac     | c--    | bd     | bd     | c--    | bd     | bd-    | bd-    | ad     | ad     | bd-    | c--    | bd-    | bd-    | c--    | c--    | ad     |
| Hi02d04    | 10 | ad                                                  | bd     | acd    | ad     | acd    | acd    | ad     | acd    | ac     | ac     | acd    | bd     | bcd    | acd    | bd     | bd     | bcd    | bcd    | bcd    | acd    | acd    | acd    | ac     |

| Markers    | LG | Aneuploid seedlings from the cross of 'M 26 × Fu 2' |        |        |        |        |        |        |        |        |        |        |        |        |        |        |        |        |        |        |        |        |        |        |
|------------|----|-----------------------------------------------------|--------|--------|--------|--------|--------|--------|--------|--------|--------|--------|--------|--------|--------|--------|--------|--------|--------|--------|--------|--------|--------|--------|
|            |    | M26F01                                              | M26F02 | M26F03 | M26F04 | M26F05 | M26F06 | M26F07 | M26F08 | M26F09 | M26F10 | M26F11 | M26F12 | M26F13 | M26F14 | M26F15 | M26F16 | M26F17 | M26F18 | M26F19 | M26F20 | M26F21 | M26F22 | M26F23 |
| Hi04f08    | 10 | bc                                                  | ac     | c--    | bc     | c--    | c--    | bc     | c--    | bd     | bd     | c--    | ac     | ac-    | c--    | ac     | ac     | ac-    | ac-    | ac-    | c--    | c--    | c--    | bd     |
| MS06g03    | 10 | bc                                                  | ac     | c--    | ad     | c--    | c--    | bd     | c--    | ac     | ac     | c--    | ac     | ac-    | ac-    | bc     | bc     | c--    | c--    | ac-    | ac-    | c--    | c--    | bc     |
| CH04c06y_1 | 10 | lm                                                  | ll     | lll    | lm     | llm    | llm    | lm     | llm    | lm     | lm     | llm    | ll     | lll    | lll    | ll     | ll     | lll    | lll    | lll    | llm    | llm    | llm    | lm     |
| CH02c11    | 10 | nn                                                  | nn     | np1p2  | nn     | np1p2  | np1p2  | nn     | np1p2  | np     | np     | np1p2  | nn     | np1p2  | np1p2  | nn     | nn     | np1p2  | np1p2  | np1p2  | np1p2  | np1p2  | np1p2  | np     |
| MS02a01    | 10 | nn                                                  | nn     | np1p2  | np     | np1p2  | np1p2  | np     | np1p2  | nn     | nn     | np1p2  | nn     | np1p2  | np1p2  | nn     | nn     | np1p2  | np1p2  | np1p2  | np1p2  | np1p2  | np1p2  | nn     |
| CH02d08    | 11 | bc                                                  | bd     | bcd    | bd     | ad     | bd     | ad     | ac     | bd     | bd     | acd    | ac     | bcd    | bc     | ac     | bcd    | bc     | acd    | ad     | ad     | ac     | ac     | acd    |
| CH04g07    | 11 | ac                                                  | bd     | acd    | ad     | bd     | ac     | bd     | ad     | ad     | ac     | bcd    | bd     | acd    | bd     | bd     | acd    | bc     | bcd    | bd     | bd     | bd     | bc     | bcd    |
| Hi06b06    | 11 | ad                                                  | bc     | acd    | ac     | bc     | ad     | bc     | ac     | ac     | ad     | bcd    | bc     | acd    | bc     | bc     | acd    | bd     | bcd    | bc     | bc     | bc     | bd     | bcd    |
| CH04h02_1  | 11 | np                                                  | nn     | np1p   | nn     | np     | np     | np     | nn     | nn     | np     | np1p   | nn     | np1p   | nn     | nn     | np1p   | nn     | np1p2  | np     | np     | nn     | nn     | np1p   |
| CH04h02_3  | 11 | np                                                  | np     | nnp    | nn     | nn     | nn     | nn     | np     | np     | nn     | nnp    | np     | nnp    | np     | np     | nnp    | np     | nnp    | nn     | nn     | np     | np     | nnp    |
| CH01b12y   | 12 | bc                                                  | ac     | bd     | bd     | ac     | acd    | acd    | acd    | acd    | ac     | bcd    | acd    | acd    | bcd    | acd    | ac     | bcd    | ad     | bd     | acd    | ac     | bcd    | acd    |
| CH01g12    | 12 | ad                                                  | bc     | ad     | ac     | bc     | bcd    | acd    | bcd    | bcd    | bd     | acd    | bcd    | bcd    | acd    | bcd    | bc     | bcd    | bd     | ad     | bcd    | bc     | acd    | bcd    |
| CH05d04    | 12 | ac                                                  | bd     | ac     | ad     | bd     | bcd    | bcd    | bcd    | bcd    | bd     | acd    | bcd    | bcd    | acd    | bcd    | bd     | acd    | bc     | ac     | bcd    | bd     | acd    | bcd    |
| CH05d11    | 12 | bd                                                  | bd     | bc     | bd     | bd     | acd    | acd    | acd    | acd    | ac     | acd    | acd    | bcd    | bcd    | acd    | ad     | bcd    | ac     | bc     | acd    | ad     | acd    | acd    |
| NZ28f04    | 12 | ac                                                  | ac     | ad     | ac     | ac     | bcd    | bcd    | bcd    | bcd    | bd     | acd    | bcd    | bcd    | acd    | bcd    | bc     | acd    | bd     | ad     | bcd    | bc     | acd    | bcd    |
| CH01f02    | 12 | hk                                                  | hh     | hk     | kk     | hk     | hk-    | hk-    | hk-    | hk-    | hh     | hk-    | hk-    | hk-    | hk-    | hk-    | hk     | hk-    | hh     | kk     | hk-    | hh     | hk-    | hk-    |
| CH03h03z_2 | 12 | np                                                  | np     | nn     | np     | np     | np1p2  | np1p2  | np1p2  | np1p2  | nn     | np1p2  | np1p2  | np1p2  | np1p2  | np     | np1p2  | nn     | nn     | np1p2  | np     | np1p2  | np1p2  | np1p2  |
| CH03a08    | 13 | bc                                                  | bc     | ad     | bd     | ac     | ac     | bc     | ac     | bcd    | bcd    | bd     | bd     | bd     | ac     | acd    | bc     | ad     | bd     | acd    | acd    | acd    | acd    | acd    |
| CH05c06_1  | 13 | bc                                                  | ad     | bc     | bd     | ad     | bc     | ad     | bd     | bd-    | bd-    | bd     | ad     | ad     | ad     | bd-    | bc     | bc     | bc     | bd-    | bd-    | c--    | c--    | c--    |
| CH05f04    | 13 | ad                                                  | bd     | ac     | ac     | bd     | ac     | bd     | ad     | acd    | bcd    | ad     | bd     | bd     | bd     | acd    | ac     | ac     | ac     | acd    | acd    | bcd    | bcd    | acd    |
| CH05h05    | 13 | ac                                                  | bc     | ad     | ad     | bc     | ad     | bc     | ac     | acd    | acd    | ac     | bc     | bc     | bc     | acd    | ad     | ad     | ad     | acd    | acd    | bcd    | bcd    | acd    |
| GD147      | 13 | ac                                                  | ac     | bd     | ad     | bc     | bc     | ac     | bc     | acd    | acd    | ad     | ad     | ad     | bc     | bcd    | ac     | bd     | ad     | bcd    | bcd    | bcd    | bcd    | bcd    |
| Hi03e04    | 13 | ac                                                  | ad     | ad     | ad     | bc     | ad     | ad     | ac     | acd    | acd    | bc     | ac     | bd     | bc     | bcd    | ad     | ac     | bd     | bcd    | bcd    | bcd    | bcd    | acd    |
| Hi20b03    | 13 | ad                                                  | ac     | bd     | ac     | ac     | bc     | ac     | bc     | bcd    | acd    | ac     | ad     | ad     | ac     | acd    | ac     | bd     | ad     | bcd    | bcd    | bcd    | bcd    | bcd    |
| NH009b     | 13 | bd                                                  | bd     | ac     | bc     | bd     | ad     | bd     | ad     | acd    | bcd    | bd     | bc     | bc     | bd     | bcd    | bd     | ac     | bc     | acd    | acd    | acd    | acd    | acd    |
| AU223486   | 13 | hh                                                  | hk     | k-     | hk     | k-     | k-     | hk     | k-     | hk-    | hk-    | hh     | hh     | hh     | hh     | k-     | hk-    | hk     | k-     | hh     | hk-    | hk-    | hk-    | hk-    |
| CH03h03z_1 | 13 | hk                                                  | hk     | k-     | hh     | k-     | k-     | hk     | k-     | hk-    | hk-    | hh     | hh     | hh     | k-     | hk-    | hk     | k-     | hh     | hk-    | hk-    | hk-    | hk-    | hk-    |
| Hi05c06_2  | 13 | h-                                                  | h-     | kk     | h-     | hk     | hk     | h-     | hk     | hk-    | hk-    | h-     | h-     | h-     | h-     | hk-    | h-     | kk     | h-     | hk-    | hk-    | hk-    | hk-    | hk-    |
| Hi07b02_3  | 13 | ll                                                  | ll     | llm    | llm    | ll     | llm    | ll     | llm    | llm    | lll    | ll     | ll     | ll     | ll     | lll    | ll     | llm    | ll     | llm    | llm    | llm    | lll    | llm    |
| NZ03c01x_2 | 13 | np                                                  | np     | nn     | nn     | nn     | np     | np     | np     | np1p2  | np1p2  | np     | nn     | np     | np     | np1p2  | np     | nn     | np     | np1p2  | np1p2  | np1p2  | np1p2  | np1p2  |
| CH03a02    | 14 | ac                                                  | bd     | acd    | acd    | ad     | ac     | ac     | ac     | acd    | bc     | bcd    | bc     | bc     | bd     | bc     | acd    | ac     | ad     | ac     | ac     | acd    | bcd    | bcd    |
| CH03d08    | 14 | bc                                                  | ad     | bcd    | bcd    | bd     | bc     | bc     | bd     | bcd    | bd     | acd    | ac     | ac     | ad     | ad     | bcd    | bc     | bd     | ad     | bc     | bcd    | acd    | acd    |
| CH01g05    | 14 | k-                                                  | k-     | hk-    | hk-    | k-     | k-     | k-     | hk     | hk-    | hk     | hk-    | hh     | k-     | hk     | hk     | hk-    | k-     | hk     | hk     | hk     | hk-    | hk-    | hk-    |
| CH05g07z_1 | 14 | h-                                                  | h-     | hk-    | hk-    | h-     | kk     | h-     | hk     | hk-    | hk     | hk-    | kk     | h-     | hk     | hk     | hk-    | h-     | hk     | hk     | hk     | hk-    | hk-    | hk-    |

| Markers    | LG    | Aneuploid seedlings from the cross of 'M 26 × Fu 2' |        |        |        |        |        |        |        |        |        |        |        |        |        |        |        |        |        |        |        |        |        |
|------------|-------|-----------------------------------------------------|--------|--------|--------|--------|--------|--------|--------|--------|--------|--------|--------|--------|--------|--------|--------|--------|--------|--------|--------|--------|--------|
|            |       | M26F01                                              | M26F02 | M26F03 | M26F04 | M26F05 | M26F06 | M26F07 | M26F08 | M26F09 | M26F10 | M26F11 | M26F12 | M26F13 | M26F14 | M26F15 | M26F16 | M26F17 | M26F18 | M26F19 | M26F20 | M26F21 | M26F22 |
| CH05g07z_2 | 14 h- | h-                                                  | hk-    | hk-    | h-     | h-     | h-     | hk     | hk-    | hk     | hk-    | kk     | h-     | hk     | hk     | hk-    | h-     | hk     | hk     | hk     | hk-    | hk-    | hk-    |
| CH02c02a_1 | 15 bd | acd                                                 | ad     | bcd    | bc     | ac     | ad     | ad     | bc     | ac     | bd     | ac     | bd     | ad     | bc     | ac     | bd     | bd     | bc     | bd     | bd     | bd     | bc     |
| CH02c09    | 15 bc | bcd                                                 | bc     | acd    | ad     | bcd    | acd    | bcd    | bd     | acd    | ac     | bcd    | ac     | bc     | ad     | bcd    | bc     | acd    | ad     | acd    | acd    | acd    | acd    |
| CH02d11    | 15 bc | bcd                                                 | bd     | acd    | ac     | bcd    | acd    | bcd    | bd     | acd    | ad     | bcd    | ad     | bd     | ac     | bcd    | bd     | acd    | ac     | acd    | acd    | acd    | acd    |
| CH03b10    | 15 ac | acd                                                 | ad     | bcd    | bc     | acd    | bcd    | acd    | ad     | bcd    | bd     | acd    | bd     | ad     | bc     | acd    | ad     | bcd    | bc     | bcd    | bcd    | bcd    | bcd    |
| Hi02g06    | 15 bc | c--                                                 | bc     | c--    | ad     | c--    | c--    | ac-    | bd     | ac-    | ac     | c--    | ac     | bc     | ad     | ac-    | bc     | ac-    | ad     | ac-    | ac-    | ac-    | ac-    |
| Hi04c05    | 15 ad | acd                                                 | ad     | acd    | bc     | acd    | bcd    | acd    | ac     | bcd    | bd     | acd    | bd     | ad     | bc     | acd    | ad     | bcd    | bc     | bcd    | bcd    | bcd    | bcd    |
| Hi06f09    | 15 ac | bcd                                                 | bc     | bcd    | ad     | bcd    | bcd    | acd    | ad     | acd    | ac     | bcd    | ac     | bc     | ad     | acd    | ac     | acd    | ad     | acd    | acd    | acd    | acd    |
| NZ02b01    | 15 ac | acd                                                 | ac     | bcd    | bd     | acd    | bcd    | acd    | ad     | bcd    | bc     | acd    | bc     | ac     | bd     | acd    | ac     | bcd    | bd     | bcd    | bcd    | bcd    | bcd    |
| CH02d10a   | 16 ac | bd                                                  | ac     | ad     | bcd    | bcd    | bd     | bcd    | bd     | bcd    | ad     | bc     | bd     | ad     | bc     | bd     | ad     | bc     | ac     | bc     | bd     | ad     | bc     |
| CH05b06z_1 | 16 ad | ad                                                  | ac     | bc     | acd    | bcd    | ac     | acd    | ac     | acd    | bc     | bd     | ac     | bcd    | acd    | bcd    | acd    | bcd    | acd    | bcd    | bcd    | acd    | acd    |
| CH05c06_2  | 16 ac | ad                                                  | ad     | ad     | bcd    | acd    | ad     | acd    | ad     | acd    | bc     | ac     | bd     | bcd    | bcd    | acd    | acd    | bcd    | bcd    | bcd    | bcd    | bcd    | acd    |
| Hi01c11x   | 16 bd | bc                                                  | bd     | ad     | bcd    | acd    | bd     | bcd    | bc     | bcd    | ad     | ac     | bd     | acd    | bcd    | acd    | bcd    | acd    | bcd    | acd    | acd    | bcd    | bcd    |
| Hi01d06y   | 16 ad | ac                                                  | ad     | bd     | acd    | bcd    | ad     | acd    | ac     | acd    | bd     | bc     | ac     | bcd    | acd    | bcd    | acd    | bcd    | acd    | bcd    | bcd    | acd    | acd    |
| CH05a04    | 16 ee | ee                                                  | fg     | eg     | efg    | eeg    | eg     | eeg    | eg     | efg    | ef     | ee     | fg     | efg    | efg    | eeg    | eeg    | eeg    | efg    | efg    | efg    | efg    | eeg    |
| Hi04e04    | 16 ef | fg                                                  | eg     | fg     | eeg    | efg    | fg     | efg    | fg     | eeg    | ee     | ef     | eg     | eeg    | eeg    | efg    | efg    | efg    | eeg    | eeg    | eeg    | eeg    | efg    |
| CH04f10    | 16 lm | lm                                                  | lm     | ll     | llm    | lll    | lm     | llm    | lm     | llm    | ll     | ll     | lm     | lll    | llm    | lll    | llm    | lll    | llm    | lll    | lll    | llm    | llm    |
| CH01h01    | 17 ad | bd                                                  | acd    | ad     | bc     | bcd    | ac     | bcd    | bd     | bd     | acd    | bc     | ac     | acd    | bcd    | ac     | ad     | acd    | acd    | acd    | acd    | bcd    | bd     |
| CH04c06y_2 | 17 bd | ac                                                  | c--    | bc     | bd     | c--    | ac     | c--    | ac     | ac     | c--    | ad     | bd     | bd-    | c--    | bd     | bc     | bd-    | bd-    | bd-    | bd-    | bd-    | ac     |
| CH05d08y_1 | 17 bc | bc                                                  | ac-    | ac     | ad     | c--    | bc     | c--    | ad     | bc     | c--    | bd     | ad     | ac-    | c--    | ad     | ac     | ac-    | ac-    | ac-    | ac-    | ac-    | bc     |
| CH05g03    | 17 bd | bc                                                  | acd    | ac     | bc     | bcd    | ad     | bcd    | ac     | bc     | acd    | bd     | ad     | acd    | acd    | ad     | ac     | acd    | acd    | acd    | acd    | bcd    | ac     |
| Hi03c05    | 17 bd | bd                                                  | ac-    | ad     | ac     | bc-    | bd     | bc-    | ac     | bd     | bc-    | bc     | ac     | ac-    | bc-    | ac     | ad     | ac-    | ac-    | ac-    | ac-    | ac-    | bd     |
| Hi07b02_1  | 17 ad | ad                                                  | bcd    | bd     | ac     | acd    | ac     | acd    | bd     | ad     | bcd    | ac     | bc     | bcd    | acd    | bc     | bd     | acd    | bcd    | bcd    | bcd    | acd    | ad     |
| Hi07b02_2  | 17 ac | ac                                                  | bcd    | bc     | ad     | acd    | bd     | acd    | bc     | ac     | bcd    | ad     | bd     | bcd    | acd    | bd     | bc     | bcd    | bcd    | bcd    | bcd    | acd    | ac     |
| Hi05c06_1  | 17 h- | h-                                                  | hkk    | h-     | hk     | hhk    | h-     | hkk    | hk     | hk     | hhk    | h-     | h-     | hkk    | hhk    | h-     | kk     | hkk    | hhk    | hkk    | hhk    | hkk    | hk     |
| CH04c06y_3 | 17 ll | ll                                                  | llm    | ll     | ll     | llm    | lm     | llm    | lm     | lm     | llm    | ll     | lm     | lll    | lll    | lm     | lm     | llm    | llm    | lll    | lll    | llm    | lm     |
| GD96       | 17 lm | lm                                                  | lll    | lm     | ll     | lll    | ll     | llm    | lm     | lm     | lll    | ll     | ll     | lll    | lll    | ll     | lm     | llm    | lll    | llm    | lll    | llm    | lm     |

Note: '-' represents a null allele, or missing data; 'p1' and 'p2' are con-dominant alleles.
