# Supplementary material for: Molecular Genetic Features of Polyploidization and Aneuploidization Reveal Unique Patterns for Genome Duplication in Diploid Malus
Source: PubMed Central journal article supplement (PMC3254611; doi:10.1371/journal.pone.0029449), 2012-01-10
Supplement: pone.0029449.s007.pdf [file pone.0029449.s007.pdf]

| Markers    | LG | Aneuploid seedlings from the cross of 'M 27 × Fu 2' |      |      |      |      |      |       |       |      |       |       |      |      |      |      |      |      |       |       |      |      |       |      |      |      |
|------------|----|-----------------------------------------------------|------|------|------|------|------|-------|-------|------|-------|-------|------|------|------|------|------|------|-------|-------|------|------|-------|------|------|------|
|            |    | MF01                                                | MF02 | MF03 | MF04 | MF05 | MF06 | MF07  | MF08  | MF09 | MF10  | MF11  | MF12 | MF13 | MF14 | MF15 | MF16 | MF17 | MF18  | MF19  | MF20 | MF21 | MF22  | MF23 | MF24 | MF25 |
| CH05g08    |    | 1 bc                                                | bd   | bc   | ac   | ad   | bc   | ad    | bc    | ad   | bd    | ad    | bc   | bc   | ac   | bd   | ad   | bc   | ad    | bc    | bd   | bc   | bd    | bc   | bd   | ad   |
| Hi02b10    |    | 1 bc                                                | bc   | bd   | ad   | ac   | bd   | ac    | bd    | ac   | bc    | ac    | bc   | bd   | ad   | bc   | ac   | bd   | ac    | bd    | bc   | bd   | bd    | bc   | bd   | ac   |
| Hi02c07    |    | 1 bd                                                | bc   | ad   | bc   | ac   | bd   | ad    | ad    | bc   | ac    | ad    | bc   | bd   | ac   | bc   | ad   | ad   | ad    | bd    | bd   | bd   | bd    | bc   | bd   | bc   |
| Hi07d08    |    | 1 bc                                                | ad   | ac   | ad   | bd   | ac   | bc    | bc    | ad   | bd    | bc    | ad   | ac   | bd   | ad   | bc   | bc   | bc    | ac    | ac   | ac   | ac    | ad   | ac   | ad   |
| Hi12c02    |    | 1 ad                                                | bd   | ad   | ac   | bc   | ad   | bc    | ad    | bc   | ac    | bc    | ad   | ad   | bd   | ac   | bc   | ad   | bc    | ad    | ac   | ad   | ad    | ac   | ad   | bc   |
| KA4B       |    | 1 h-                                                | kk   | h-   | hh   | h-   | h-   | kk    | h-    | h-   | hh    | h-    | h-   | h-   | kk   | hh   | h-   | h-   | kk    | h-    | hh   | h-   | h-    | hh   | h-   | h-   |
| CH02a04z   |    | 2 ac                                                | bd   | bc   | bc   | ac   | ac   | bc    | ac    | bc   | ac    | bc    | bcd  | bcd  | bcd  | bcd  | bc   | bd   | acd   | ac    | ac   | ad   | acd   | ac   | acd  | acd  |
| CH02c02a_3 |    | 2 bc                                                | ad   | ac   | ad   | bd   | ac   | bc    | bc    | ad   | bd    | bc    | acd  | acd  | bcd  | acd  | bc   | bc   | bcd   | ac    | ac   | ac   | acd   | ad   | acd  | acd  |
| CH02c06    |    | 2 ac                                                | bc   | ac   | ad   | bd   | bc   | ad    | bc    | ad   | ad    | ac    | bcd  | bcd  | acd  | bcd  | bc   | bc   | acd   | ac    | ac   | ac   | acd   | bd   | bcd  | acd  |
| CH03d01    |    | 2 ad                                                | bc   | bd   | bd   | ad   | ad   | bd    | ad    | ad   | ad    | bd    | bcd  | bcd  | bcd  | bcd  | bd   | bc   | acd   | ad    | ad   | ac   | acd   | ad   | bcd  | acd  |
| CH03d10    |    | 2 ad                                                | ad   | bd   | ac   | bd   | bd   | ad    | bd    | ad   | bd    | ad    | acd  | acd  | acd  | acd  | ad   | ac   | bcd   | bd    | bd   | bc   | bcd   | bd   | bcd  | bcd  |
| CH05e03    |    | 2 ac                                                | ac   | bc   | ad   | bc   | bc   | ac    | bc    | ac   | bc    | ac    | acd  | bcd  | bcd  | bcd  | ac   | ad   | acd   | bc    | bc   | bd   | acd   | bc   | bcd  | acd  |
| CN493139   |    | 2 bd                                                | ac   | ac   | ac   | bc   | bc   | bc    | bd    | ad   | ac    | ac    | bcd  | acd  | acd  | acd  | bc   | ac   | bcd   | bc    | ad   | bd   | bcd   | bc   | acd  | bcd  |
| Hi02a07    |    | 2 bc                                                | ad   | ac   | ac   | bc   | bc   | ac    | bc    | ac   | bc    | ac    | acd  | acd  | acd  | acd  | ac   | ad   | bcd   | bc    | bc   | bd   | bcd   | bc   | acd  | bcd  |
| CH02c02a_2 |    | 2 lm                                                | lm   | lm   | ll   | lm   | lm   | lm    | lm    | lm   | ll    | ll    | llm  | lll  | lll  | lll  | lm   | lm   | llm   | lm    | ll   | lm   | llm   | ll   | lll  | llm  |
| Hi05c06_3  |    | 2 nn                                                | nn   | nn   | nn   | nn   | nn   | nn    | nn    | nn   | nn    | nn    | nnp  | nnp  | nnp  | nnp  | nn   | np   | nnp   | nn    | nn   | np   | nnp   | nn   | np   | np   |
| AU223657   |    | 3 bd                                                | ad   | ac   | ad   | ad   | bd   | acd   | bcd   | bc   | bcd   | acd   | bc   | bc   | bd   | ad   | bc   | bc   | bcd   | acd   | ac   | ad   | bcd   | bd   | bc   | bd   |
| CH03e03    |    | 3 ad                                                | ad   | bd   | ac   | ad   | bd   | acd   | bcd   | bc   | bcd   | bcd   | bc   | bc   | bd   | ad   | ac   | bc   | bcd   | acd   | ac   | ad   | bcd   | bd   | bc   | bd   |
| Hi07e08x   |    | 3 ac                                                | bd   | bc   | bc   | bc   | ac   | bcd   | acd   | ad   | acd   | acd   | ad   | ad   | ac   | bc   | bd   | ad   | acd   | bcd   | bd   | bc   | acd   | ac   | ad   | ac   |
| CH03g07    |    | 3 fg                                                | fg   | ef   | fg   | fg   | eg   | eeg   | efg   | ee   | efg   | efg   | ef   | ee   | eg   | fg   | ee   | ee   | efg   | efg   | ef   | ee   | eeg   | eg   | fg   | eg   |
| HGA8bY     |    | 3 nn                                                | nn   | nn   | np   | nn   | np   | np1p2 | np1p2 | nn   | np1p2 | np1p2 | nn   | np   | np   | nn   | np   | np   | np1p2 | np1p2 | nn   | np   | np1p2 | np   | nn   | np   |
| Hi04c10x_1 |    | 3 np                                                | nn   | np   | np   | np   | nn   | np1p2 | np1p2 | np   | np1p2 | np1p2 | np   | nn   | nn   | np   | nn   | nn   | np1p2 | np1p2 | np   | nn   | np1p2 | nn   | np   | nn   |
| CH02c02b   |    | 4 bc                                                | ad   | ac   | ac   | bcd  | bc   | acd   | bcd   | ac   | bcd   | acd   | ad   | ad   | acd  | acd  | acd  | acd  | bc    | bcd   | bc   | bcd  | bd    | bcd  | acd  | bcd  |
| CH05d02    |    | 4 bd                                                | bc   | bd   | ad   | acd  | ad   | bcd   | acd   | ac   | bcd   | bcd   | ac   | ad   | bcd  | acd  | bcd  | acd  | bc    | bcd   | bd   | acd  | ad    | bcd  | bcd  | --   |
| GD162      |    | 4 ac                                                | bc   | ac   | ad   | bcd  | bc   | acd   | bcd   | bd   | acd   | acd   | bd   | bc   | acd  | bcd  | acd  | bcd  | ad    | acd   | ac   | bcd  | bc    | acd  | acd  | bcd  |
| Hi04c10x_3 |    | 4 bc                                                | ac   | bc   | bd   | ac-  | ad   | c--   | ac-   | ad   | c--   | c--   | ad   | ac   | c--  | ac-  | c--  | ac-  | ad    | c--   | bc   | ac-  | ac    | c--  | c--  | c--  |
| Hi07b02_4  |    | 4 ac                                                | bc   | bd   | ad   | bcd  | bc   | acd   | bcd   | ad   | acd   | acd   | bd   | bc   | acd  | bcd  | acd  | bcd  | ad    | acd   | ac   | bcd  | bc    | acd  | acd  | acd  |
| CH04e02    |    | 4 ef                                                | ef   | ee   | eg   | efg  | fg   | eeg   | efg   | ef   | eeg   | eeg   | fg   | fg   | eeg  | eeg  | eeg  | eeg  | fg    | eeg   | ee   | efg  | eg    | eeg  | eeg  | efg  |
| CH02a08z   |    | 5 bcd                                               | ac   | bcd  | ad   | bcd  | bcd  | bcd   | bcd   | bcd  | acd   | acd   | bc   | ad   | bcd  | ac   | bc   | bcd  | bcd   | ad    | acd  | bcd  | bcd   | bcd  | acd  | bc   |
| CH04g09y   |    | 5 acd                                               | ad   | bcd  | ac   | acd  | acd  | acd   | bcd   | acd  | bcd   | bcd   | bd   | ac   | acd  | ad   | bd   | acd  | acd   | ac    | bcd  | acd  | acd   | bcd  | bcd  | bd   |
| Hi11a03    |    | 5 acd                                               | ad   | acd  | bc   | acd  | acd  | bcd   | acd   | acd  | bcd   | bcd   | bd   | bc   | acd  | bd   | ad   | acd  | acd   | bd    | bcd  | acd  | acd   | acd  | bcd  | ad   |
| CH03a04    |    | 5 efg                                               | ef   | efg  | eg   | efg  | efg  | eeg   | eeg   | efg  | eeg   | eeg   | ee   | eg   | efg  | ee   | ef   | efg  | efg   | ee    | eeg  | efg  | efg   | efg  | eeg  | ef   |
| CH03a09    |    | 5 efg                                               | fg   | efg  | eg   | efg  | efg  | eeg   | efg   | efg  | eeg   | eeg   | ef   | ee   | efg  | fg   | fg   | efg  | efg   | eg    | eeg  | efg  | eeg   | efg  | eeg  | ef   |
| CH04e03    |    | 5 eeg                                               | eg   | eeg  | ef   | eeg  | eeg  | efg   | efg   | eeg  | efg   | efg   | fg   | ef   | eeg  | fg   | fg   | eeg  | eeg   | fg    | efg  | eeg  | eeg   | eeg  | efg  | eg   |
| CH04h02_2  |    | 5 hhk                                               | hk   | hkk  | kk   | hhk  | hkk  | hhk   | hkk   | hhk  | hkk   | hkk   | kk   | h-   | hkk  | kk   | hk   | hkk  | hkk   | kk    | hhk  | hhk  | hkk   | hkk  | hhk  | hk   |

| Markers    | LG | Aneuploid seedlings from the cross of 'M 27 × Fu 2' |      |      |                   |                   |                   |      |      |                   |      |      |                   |                   |                   |                   |                   |      |                   |                   |                   |                   |                   |                   |                   |                   |
|------------|----|-----------------------------------------------------|------|------|-------------------|-------------------|-------------------|------|------|-------------------|------|------|-------------------|-------------------|-------------------|-------------------|-------------------|------|-------------------|-------------------|-------------------|-------------------|-------------------|-------------------|-------------------|-------------------|
|            |    | MF01                                                | MF02 | MF03 | MF04              | MF05              | MF06              | MF07 | MF08 | MF09              | MF10 | MF11 | MF12              | MF13              | MF14              | MF15              | MF16              | MF17 | MF18              | MF19              | MF20              | MF21              | MF22              | MF23              | MF24              | MF25              |
| CH04h02_4  | 5  | hk-                                                 | h-   | hk-  | kk                | hk-               | hk-               | hk-  | hk-  | hk-               | hk-  | h-   | kk                | hk-               | h-                | kk                | hk-               | hk-  | h-                | hk-               | hk-               | hk-               | hk-               | hk-               | hk-               | kk                |
| CH05e06    | 5  | hk-                                                 | k-   | hk-  | hh                | hk-               | hk-               | hk-  | hk-  | hk-               | hk-  | k-   | hh                | hk-               | k-                | hh                | hk-               | hk-  | k-                | hk-               | hk-               | hk-               | hk-               | hk-               | hk-               | hh                |
| Hi04d02    | 5  | hkk                                                 | hh   | hkh  | hh                | hkh               | hkk               | hkh  | hkk  | hkh               | hkk  | hk   | k-                | hkh               | hh                | hk                | hkh               | hkk  | hh                | hkk               | hkk               | hkh               | hkh               | hkh               | hk                |                   |
| Hi21c08    | 5  | hkh                                                 | kk   | hkk  | hk                | hkk               | hkh               | hkk  | hkh  | hkk               | hkh  | hk   | h-                | hkk               | kk                | hk                | hkk               | hkh  | kk                | hkh               | hkh               | hkk               | hkk               | hkh               | hk                |                   |
| AJ000761   | 6  | bd                                                  | bd   | bd   | ac                | bcd               | ac                | ac   | ac   | bd                | bd   | ac   | ad                | acd               | bcd               | bc                | ad                | acd  | bc                | bc                | acd               | acd               | ad                | bd                | ad                | bcd               |
| CH03c01    | 6  | bc                                                  | bc   | bc   | ad                | acd               | ad                | ad   | ad   | bc                | bc   | ad   | ac                | acd               | acd               | bd                | ad                | bcd  | bd                | bd                | bcd               | bcd               | ac                | bc                | ac                | acd               |
| CH03d07    | 6  | ac                                                  | ac   | ac   | bd                | acd               | bd                | bd   | bd   | ac                | ac   | bd   | bc                | bcd               | acd               | ad                | bd                | bcd  | ad                | ad                | bcd               | bcd               | bc                | ac                | bc                | acd               |
| CH03d12    | 6  | ef                                                  | ee   | ee   | eg                | eeg               | fg                | fg   | fg   | ee                | ee   | eg   | ef                | efg               | eeg               | ef                | fg                | eeg  | eg                | eg                | efg               | eeg               | eg                | ee                | ef                | eeg               |
| Hi01d05    | 6  | fg                                                  | fg   | eg   | ef                | eef               | ee                | ee   | ee   | fg                | fg   | ef   | eg                | efg               | eef               | eg                | ee                | eef  | ef                | ef                | efg               | eef               | ef                | fg                | eg                | eef               |
| Hi04c10x_2 | 7  | bc                                                  | bc   | ad   | ad                | bd                | bc                | bd   | bd   | ac                | ac   | ad   | acd               | bd                | ac                | bc                | ac                | ac   | ad                | ac                | ac                | bd                | ad                | ad                | bc                | ad                |
| Hi05b09    | 7  | bc                                                  | ad   | ad   | bc                | ac                | ad                | ac   | ac   | bd                | bd   | bc   | bcd               | ac                | bd                | ad                | bd                | bd   | bc                | bd                | bd                | ac                | bc                | bc                | ad                | bc                |
| CH04e05    | 7  | ll                                                  | lm   | lm   | ll                | lm                | lm                | lm   | lm   | ll                | ll   | ll   | lll               | lm                | ll                | lm                | ll                | ll   | ll                | ll                | ll                | lm                | ll                | ll                | lm                | ll                |
| CH05b06z_2 | 7  | nn                                                  | np   | nn   | nn                | np                | nn                | nn   | np   | nn                | nn   | np   | np <sup>1p2</sup> | np                | nn                | np                | nn                | np   | np                | nn                | np                | nn                | np                | nn                | nn                | np                |
| CH01c06    | 8  | ac                                                  | ad   | ad   | bd                | ac                | ad                | bd   | bc   | bc                | bc   | ac   | bc                | ac                | bc                | ac                | bd                | bc   | ac                | ad                | bc                | bc                | ac                | bc                | bc                | ac                |
| CH02g09    | 8  | ad                                                  | ac   | ac   | bc                | ad                | ac                | bc   | bd   | bd                | bd   | ad   | bd                | ad                | bd                | ad                | bc                | bd   | ad                | ac                | bd                | bd                | ad                | bd                | bd                | ad                |
| Hi04b12    | 8  | bc                                                  | bd   | bd   | ad                | bc                | bd                | ad   | ac   | ac                | ac   | bc   | ac                | bc                | ac                | bc                | ad                | ac   | bc                | bd                | ac                | ac                | bc                | ac                | ac                | bc                |
| Hi23g12    | 8  | bc                                                  | bc   | bd   | ac                | bd                | bc                | ac   | ad   | ad                | ad   | bd   | ad                | bd                | ad                | bd                | ac                | ad   | bd                | bc                | ad                | ad                | bd                | ad                | ad                | bd                |
| Hi04e05    | 8  | ll                                                  | ll   | ll   | lm                | ll                | ll                | lm   | lm   | lm                | lm   | ll   | lm                | ll                | lm                | ll                | lm                | lm   | ll                | ll                | lm                | lm                | ll                | lm                | lm                | ll                |
| CH01h02_2  | 9  | bc                                                  | ad   | bd   | bcd               | acd               | acd               | ad   | ac   | acd               | ac   | ad   | bcd               | acd               | bcd               | bcd               | acd               | ad   | acd               | bcd               | bcd               | acd               | acd               | acd               | bcd               | acd               |
| CH05d08y_2 | 9  | bc                                                  | ad   | bc   | acd               | bcd               | bcd               | bd   | ad   | bcd               | ad   | bd   | acd               | acd               | acd               | acd               | bcd               | bd   | bcd               | acd               | bcd               | bcd               | bcd               | bcd               | bcd               | bcd               |
| Hi05e07    | 9  | ac                                                  | bc   | ad   | acd               | bcd               | bcd               | bc   | bd   | bcd               | bd   | bc   | acd               | bcd               | acd               | acd               | bcd               | bc   | bcd               | acd               | acd               | bcd               | bcd               | bcd               | acd               | bcd               |
| NH029a     | 9  | ad                                                  | bd   | ac   | bcd               | acd               | bcd               | bd   | bc   | acd               | bc   | bd   | bcd               | acd               | bcd               | acd               | acd               | bd   | acd               | acd               | bcd               | acd               | bcd               | acd               | bcd               | acd               |
| CH01h02_1  | 9  | ee                                                  | ee   | eg   | efg               | eef               | eef               | fg   | ef   | eef               | ef   | ef   | efg               | eef               | efg               | efg               | eef               | fg   | eef               | efg               | eef               | eef               | eef               | eef               | efg               | eef               |
| CH05c07    | 9  | ef                                                  | fg   | fg   | efg               | eeg               | eeg               | ee   | eg   | eeg               | eg   | eg   | efg               | eeg               | efg               | efg               | eeg               | ee   | eeg               | efg               | efg               | eeg               | eeg               | eeg               | efg               | eeg               |
| GD142      | 9  | ef                                                  | ee   | eg   | efg               | eeg               | eeg               | eg   | eg   | eeg               | eg   | eg   | efg               | eeg               | efg               | efg               | eeg               | fg   | eeg               | efg               | efg               | eeg               | eeg               | eeg               | efg               | eeg               |
| Hi01d01    | 9  | nn                                                  | np   | nn   | np <sup>1p2</sup> | np <sup>1p2</sup> | np <sup>1p2</sup> | np   | np   | np <sup>1p2</sup> | np   | np   | np <sup>1p2</sup> | np <sup>1p2</sup> | np <sup>1p2</sup> | np <sup>1p2</sup> | np <sup>1p2</sup> | np   | np <sup>1p2</sup> | np <sup>1p2</sup> | np <sup>1p2</sup> | np <sup>1p2</sup> | np <sup>1p2</sup> | np <sup>1p2</sup> | np <sup>1p2</sup> | np <sup>1p2</sup> |
| CH01f07a   | 10 | ad                                                  | ac   | bcd  | ac                | acd               | acd               | bc   | bd   | bcd               | bd   | bc   | acd               | acd               | bd                | bcd               | acd               | bcd  | ac                | bcd               | bcd               | ac                | acd               | bcd               | acd               | acd               |
| CH01f12    | 10 | ad                                                  | bc   | bcd  | bd                | bcd               | acd               | ac   | bd   | bcd               | ac   | bd   | bcd               | bcd               | bd                | acd               | bcd               | acd  | bc                | bcd               | acd               | bc                | bcd               | acd               | bcd               | acd               |
| CH02a10    | 10 | bd                                                  | bc   | acd  | bc                | bcd               | bcd               | ad   | ac   | acd               | ac   | ad   | bcd               | bcd               | ac                | acd               | bcd               | acd  | bd                | acd               | acd               | bd                | bcd               | acd               | bcd               | bcd               |
| CH02b03b   | 10 | bc                                                  | bd   | bcd  | bd                | bcd               | acd               | ac   | ad   | acd               | ad   | ac   | acd               | acd               | ad                | bcd               | acd               | bcd  | bc                | acd               | bcd               | bc                | acd               | bcd               | acd               | acd               |
| CH02b07    | 10 | bd                                                  | bc   | acd  | ad                | acd               | bcd               | bc   | bd   | acd               | bc   | bd   | acd               | acd               | ad                | bcd               | acd               | bcd  | ac                | acd               | bcd               | ac                | bcd               | acd               | acd               | bcd               |
| CH02c11    | 10 | ad                                                  | ac   | bcd  | ac                | acd               | bcd               | bd   | bc   | bcd               | bc   | bd   | acd               | acd               | bc                | bcd               | acd               | bcd  | ad                | acd               | acd               | ad                | acd               | bcd               | acd               | bcd               |
| Hi02d04    | 10 | bd                                                  | ac   | bcd  | ad                | bcd               | acd               | ac   | ad   | bcd               | ac   | ad   | bcd               | bcd               | bd                | acd               | bcd               | acd  | bc                | bcd               | acd               | bc                | acd               | bcd               | bcd               | acd               |



| Markers    | LG | Aneuploid seedlings from the cross of 'M 27 × Fu 2' |      |      |      |      |       |       |      |       |       |       |      |       |      |      |       |      |      |       |       |       |       |       |      |       |     |
|------------|----|-----------------------------------------------------|------|------|------|------|-------|-------|------|-------|-------|-------|------|-------|------|------|-------|------|------|-------|-------|-------|-------|-------|------|-------|-----|
|            |    | MF01                                                | MF02 | MF03 | MF04 | MF05 | MF06  | MF07  | MF08 | MF09  | MF10  | MF11  | MF12 | MF13  | MF14 | MF15 | MF16  | MF17 | MF18 | MF19  | MF20  | MF21  | MF22  | MF23  | MF24 | MF25  |     |
| CH05g07z_1 | 14 | ac                                                  | ad   | acd  | acd  | bc   | ad    | bc    | bcd  | bc    | bc    | acd   | bcd  | ac    | acd  | bc   | ad    | bcd  | bcd  | bcd   | bcd   | acd   | acd   | acd   | bcd  | bd    |     |
| CH05g07z_2 | 14 | kk                                                  | h-   | hhk  | hkk  | hk   | h-    | h-    | hkk  | h-    | h-    | hhk   | hkk  | hk    | kk   | kk   | h-    | hkk  | hhk  | hhk   | hkk   | hhk   | hhk   | hkk   | hkk  | hk    |     |
| CH02c02a_1 | 15 | bd                                                  | ad   | bc   | acd  | ac   | bc    | ac    | ac   | acd   | bc    | ad    | acd  | bcd   | ad   | acd  | acd   | bcd  | bcd  | acd   | acd   | acd   | bd    | ac    | bcd  | bcd   |     |
| CH02c09    | 15 | bc                                                  | ad   | ac   | bcd  | ac   | ac    | bc    | bc   | bcd   | ad    | bd    | acd  | acd   | bd   | bcd  | bcd   | acd  | bcd  | acd   | bcd   | bcd   | ad    | ac    | acd  | acd   |     |
| CH02d11    | 15 | bc                                                  | ad   | bd   | acd  | bd   | bd    | ad    | ad   | acd   | bc    | ac    | bcd  | bcd   | ac   | acd  | acd   | bcd  | acd  | bcd   | acd   | acd   | bc    | bd    | bcd  | bcd   |     |
| CH03b10    | 15 | ac                                                  | bd   | ad   | bcd  | ad   | ad    | bd    | bd   | bcd   | ac    | bc    | acd  | acd   | bc   | bcd  | bcd   | acd  | bcd  | acd   | bcd   | bcd   | ac    | ad    | acd  | acd   |     |
| Hi04c05    | 15 | bc                                                  | ac   | ad   | bcd  | ad   | ad    | bd    | bd   | acd   | ac    | bc    | bcd  | bcd   | bc   | acd  | acd   | bcd  | acd  | acd   | acd   | acd   | bcd   | ac    | ad   | bcd   | bcd |
| Hi06f09    | 15 | ac                                                  | bc   | ad   | bcd  | bd   | bd    | bd    | bd   | bcd   | ac    | bc    | acd  | acd   | bc   | bcd  | bcd   | acd  | acd  | bcd   | bcd   | bcd   | bc    | bd    | acd  | acd   |     |
| NZ02b01    | 15 | bc                                                  | ac   | bd   | acd  | bd   | bd    | ad    | ad   | acd   | bc    | ac    | bcd  | bcd   | ac   | acd  | acd   | bcd  | acd  | acd   | acd   | acd   | bc    | bd    | bcd  | bcd   |     |
| Hi02g06    | 15 | nn                                                  | np   | np   | nnp  | np   | np    | np    | np   | nnp   | np    | nn    | nnp  | nnp   | nn   | nnp  | nnp   | nnp  | nnp  | nnp   | nnp   | nnp   | np    | np    | np   | np    |     |
| CH05c06_2  | 16 | ad                                                  | ad   | ac   | ad   | bcd  | acd   | acd   | ad   | acd   | acd   | acd   | acd  | acd   | bc   | ad   | acd   | bc   | acd  | ad    | bc    | bc    | acd   | acd   | bcd  | bcd   |     |
| Hi01c11x   | 16 | bc                                                  | bd   | bc   | bc   | acd  | acd   | bcd   | ac   | bcd   | bcd   | acd   | acd  | bcd   | bd   | bd   | acd   | ad   | acd  | ac    | bd    | ad    | bcd   | bcd   | acd  | bcd   |     |
| Hi01d06y   | 16 | ac                                                  | ad   | ac   | ac   | bcd  | bcd   | acd   | bc   | bcd   | acd   | bcd   | bcd  | acd   | ad   | ad   | acd   | bd   | bcd  | bc    | ad    | bd    | acd   | acd   | bcd  | acd   |     |
| Hi04e04    | 16 | bc                                                  | bc   | bd   | bc   | acd  | bcd   | bcd   | bc   | bcd   | bcd   | bcd   | bcd  | ad    | bc   | acd  | ad    | bcd  | ac   | bd    | ad    | bcd   | bcd   | acd   | bcd  |       |     |
| CH02d10a   | 16 | ef                                                  | ef   | fg   | fg   | efg  | eef   | efg   | fg   | eef   | efg   | eef   | eef  | eef   | eg   | ee   | eef   | eg   | eef  | ef    | fg    | eg    | eef   | eef   | efg  | efg   |     |
| CH05a04    | 16 | eg                                                  | eg   | ee   | ee   | efg  | eeg   | efg   | ee   | eeg   | efg   | eeg   | eeg  | eeg   | ef   | fg   | eeg   | ef   | eeg  | eg    | ee    | ef    | eeg   | eeg   | efg  | efg   |     |
| CH05b06z_1 | 16 | fg                                                  | fg   | ef   | fg   | eeg  | efg   | eeg   | ef   | efg   | eeg   | efg   | efg  | efg   | ee   | eg   | efg   | ee   | efg  | fg    | ee    | ee    | efg   | efg   | eeg  | eeg   |     |
| CH04f10    | 16 | lm                                                  | ll   | lm   | lm   | lll  | lll   | llm   | ll   | lll   | llm   | lll   | lll  | llm   | lm   | lm   | lll   | ll   | lll  | ll    | lm    | ll    | llm   | llm   | lll  | llm   |     |
| CH01h01    | 17 | bc                                                  | ad   | bc   | ac   | bc   | bcd   | bcd   | ad   | bcd   | acd   | bcd   | ac   | acd   | ac   | ad   | bcd   | bd   | bc   | acd   | bcd   | bcd   | bcd   | bcd   | bc   | bcd   |     |
| CH04c06y_2 | 17 | ac                                                  | bd   | bc   | ac   | bc   | bd-   | bd-   | ad   | c--   | c--   | c--   | ad   | bd-   | ac   | bd   | bd-   | bd   | bc   | c--   | bd-   | bd-   | bd-   | bd-   | ac   | bd-   |     |
| CH05d08y_1 | 17 | bc                                                  | ad   | ac   | bc   | ac   | ac-   | c--   | bd   | c--   | c--   | ac-   | bd   | ac-   | bc   | ad   | ac-   | ad   | ac   | c--   | ac-   | ac-   | ac-   | ac-   | bc   | ac-   |     |
| CH05g03    | 17 | ac                                                  | bd   | bc   | bc   | ac   | acd   | acd   | bd   | acd   | bcd   | acd   | bc   | bcd   | ac   | bd   | acd   | ad   | ad   | bcd   | acd   | bcd   | acd   | acd   | ac   | acd   |     |
| Hi03c05    | 17 | ac                                                  | bd   | ad   | bd   | ad   | ac-   | ac-   | bc   | bc-   | bc-   | bc-   | bc   | ac-   | bd   | ac   | ac-   | ac   | ad   | bc-   | ac-   | ac-   | ac-   | ac-   | bd   | ac-   |     |
| Hi07b02_1  | 17 | bc                                                  | ac   | ad   | bd   | ad   | acd   | acd   | bc   | acd   | bcd   | acd   | bd   | acd   | bd   | bc   | acd   | ac   | ad   | bcd   | acd   | acd   | acd   | acd   | bd   | acd   |     |
| Hi07b02_2  | 17 | bc                                                  | ad   | bc   | ac   | bc   | bcd   | bcd   | ad   | bcd   | acd   | bcd   | ac   | acd   | ac   | ad   | bcd   | bc   | bc   | acd   | bcd   | bcd   | bcd   | bcd   | bc   | bcd   |     |
| CH04c06y_3 | 17 | lm                                                  | ll   | ll   | ll   | ll   | lll   | lll   | llm  | lll   | llm   | lll   | ll   | llm   | lm   | lm   | llm   | lm   | ll   | llm   | llm   | lll   | lll   | lll   | ll   | lll   |     |
| GD96       | 17 | ll                                                  | ll   | lm   | lm   | lm   | llm   | lll   | ll   | llm   | lll   | llm   | lm   | lll   | lm   | ll   | lll   | ll   | lm   | llm   | lll   | llm   | lll   | llm   | lm   | lll   |     |
| Hi05c06_1  | 17 | np                                                  | np   | np   | nn   | nn   | np1p2 | np1p2 | np   | np1p2 | np1p2 | np1p2 | nn   | np1p2 | nn   | nn   | np1p2 | np   | np   | np1p2 | np1p2 | np1p2 | np1p2 | np1p2 | np   | np1p2 |     |

Note: '-' represents a null allele, or missing data; 'p1' and 'p2' are con-dominant alleles; 'M' represents for 'M27' in the seedling names.
