# Supplementary material for: Molecular Genetic Features of Polyploidization and Aneuploidization Reveal Unique Patterns for Genome Duplication in Diploid Malus
Source: PubMed Central journal article supplement (PMC3254611; doi:10.1371/journal.pone.0029449), 2012-01-10
Supplement: pone.0029449.s008.pdf [file pone.0029449.s008.pdf]

| Markers    | LG | Aneuploid seedlings from the cross of 'CO 2 × RO 6' |      |      |      |       |      |      |      |      |      |      |      |      |       |      |       |      |       |       |       |      |       |      |       |      |       |      |     |
|------------|----|-----------------------------------------------------|------|------|------|-------|------|------|------|------|------|------|------|------|-------|------|-------|------|-------|-------|-------|------|-------|------|-------|------|-------|------|-----|
|            |    | CR01                                                | CR02 | CR03 | CR04 | CR05  | CR06 | CR07 | CR08 | CR09 | CR10 | CR11 | CR12 | CR13 | CR14  | CR15 | CR16  | CR17 | CR18  | CR19  | CR20  | CR21 | CR22  | CR23 | CR24  | CR25 | CR26  | CR27 |     |
| Hi07d08    | 1  | bc                                                  | bc   | ad   | ad   | bc    | bc   | bc   | ac   | ac   | bc   | ad   | ac   | bd   | ac    | bc   | bd    | bc   | ac    | bc    | bc    | ad   | bd    | bc   | bd    | ac   | ac    | bc   |     |
| Hi12c02    | 1  | bd                                                  | bc   | ad   | ac   | bc    | bc   | ad   | ad   | bc   | ad   | ac   | ad   | bd   | bc    | bc   | bc    | ad   | ad    | bc    | bd    | ac   | bd    | bd   | bc    | ad   | ac    | bd   |     |
| KA4B       | 1  | h-                                                  | h-   | kk   | hk   | h-    | h-   | kk   | kk   | h-   | kk   | hk   | kk   | h-   | h-    | h-   | h-    | kk   | kk    | h-    | h-    | hk   | h-    | h-   | h-    | kk   | h-    | h-   |     |
| CH05g08    | 1  | lm                                                  | ll   | lm   | lm   | ll    | ll   | ll   | lm   | lm   | ll   | lm   | lm   | ll   | lm    | ll   | ll    | ll   | lm    | ll    | ll    | lm   | ll    | ll   | ll    | lm   | lm    | ll   |     |
| Hi02b10    | 1  | ll                                                  | ll   | ll   | ll   | ll    | lm   | lm   | lm   | ll   | lm   | ll   | lm   | ll   | ll    | ll   | ll    | lm   | ll    | ll    | lm    | ll   | ll    | ll   | lm    | ll   | ll    | ll   |     |
| Hi02c07    | 1  | lm                                                  | lm   | lm   | lm   | lm    | ll   | ll   | ll   | lm   | ll   | ll   | ll   | lm   | lm    | lm   | lm    | ll   | lm    | lm    | ll    | lm   | lm    | ll   | ll    | lm   | lm    | lm   |     |
| CH02c06    | 2  | ac                                                  | ad   | ad   | bc   | acd   | bd   | bc   | bc   | ad   | bc   | bc   | bc   | bcd  | bd    | acd  | bd    | acd  | acd   | bcd   | bc    | bcd  | ad    | acd  | acd   | bcd  | ac    |      |     |
| CH03d01    | 2  | ad                                                  | ad   | bd   | ac   | bcd   | ad   | ac   | ad   | ad   | ac   | bd   | bd   | ad   | bcd   | ad   | bcd   | ad   | acd   | bcd   | bcd   | bc   | acd   | ac   | acd   | bcd  | acd   | ac   |     |
| CH05e03    | 2  | ac                                                  | ad   | bc   | ad   | bcd   | ac   | ad   | ac   | ac   | ad   | bc   | bc   | ac   | bcd   | bc   | bcd   | ac   | acd   | bcd   | bcd   | bd   | acd   | ad   | acd   | bcd  | bcd   | ad   |     |
| CN493139   | 2  | bc                                                  | bc   | bc   | bd   | c--   | bc   | ad   | ac   | ac   | bd   | bc   | ad   | ac   | c--   | ac   | ac-   | ad   | c--   | c--   | c--   | ad   | ac-   | ac   | c--   | ac-  | ac-   | bc   |     |
| Hi02a07    | 2  | ee                                                  | eg   | ee   | eg   | eeg   | ef   | fg   | ef   | ee   | eg   | ee   | fg   | fg   | eeg   | ef   | efg   | fg   | eeg   | eeg   | eeg   | fg   | efg   | fg   | eeg   | efg  | eeg   | ee   |     |
| CH02a04z   | 2  | h-                                                  | h-   | kk   | h-   | hkk   | h-   | h-   | h-   | kk   | h-   | kk   | kk   | h-   | hkk   | kk   | hkk   | h-   | hkk   | hkk   | hkk   | hk   | hkk   | h-   | hkk   | hkk  | hkk   | h-   |     |
| CH02c02a_2 | 2  | lm                                                  | lm   | lm   | lm   | llm   | ll   | ll   | ll   | ll   | lm   | lm   | ll   | ll   | llm   | ll   | lll   | ll   | llm   | llm   | llm   | ll   | lll   | ll   | llm   | lll  | llm   | lm   |     |
| CH02c02a_3 | 2  | nn                                                  | np   | nn   | np   | np1p2 | nn   | np   | nn   | nn   | np   | nn   | np   | np   | np1p2 | nn   | np1p2 | np   | np1p2 | np1p2 | np1p2 | np   | np1p2 | np   | np1p2 | np   | np1p2 | nn   |     |
| CH03d10    | 2  | nn                                                  | np   | nn   | np   | np1p2 | nn   | np   | nn   | nn   | np   | nn   | nn   | nn   | np1p2 | nn   | np1p2 | nn   | np1p2 | np1p2 | np1p2 | np   | np1p2 | np   | np1p2 | np   | np1p2 | np   |     |
| Hi05c06_3  | 2  | nn                                                  | np   | nn   | np   | nnp   | nn   | np   | nn   | nn   | np   | nn   | nn   | nnp  | nn    | nnp  | nn    | nnp  | nnp   | nnp   | np    | np   | np    | nnp  | nnp   | nnp  | nnp   | np   |     |
| CH03e03    | 3  | bc                                                  | ad   | bc   | ad   | ac    | ad   | ac   | ac   | ac   | acd  | acd  | bcd  | bd   | ad    | acd  | ac    | bd   | bcd   | ad    | bd    | acd  | bcd   | bd   | acd   | acd  | acd   | bd   |     |
| CH03g07    | 3  | ad                                                  | ac   | bc   | bc   | ad    | bc   | bd   | bd   | bd   | bcd  | bcd  | acd  | ac   | bc    | bcd  | bc    | ac   | acd   | bc    | ac    | bcd  | acd   | ac   | bcd   | acd  | acd   | ac   |     |
| HGA8bY     | 3  | ac                                                  | bd   | ac   | ac   | ad    | bc   | bc   | bd   | bd   | bc-  | bc-  | ac-  | ad   | bd    | ac-  | ac    | bc   | ac-   | bc    | ac    | bc-  | ac-   | bc   | ac-   | bc-  | bc-   | bc   |     |
| Hi04c10x_1 | 3  | ac                                                  | bc   | ac   | ac   | bd    | ac   | ad   | ad   | ad   | ac-  | ac-  | c--  | bc   | ac    | ac-  | bc    | bc   | c--   | ac    | bc    | ac-  | ac-   | bc   | c--   | c--  | c--   | ac   |     |
| AU223657   | 3  | ee                                                  | fg   | ee   | ef   | fg    | ef   | eg   | eg   | eg   | eeg  | eeg  | efg  | fg   | ee    | efg  | ef    | ef   | efg   | ee    | ef    | eeg  | eeg   | ef   | efg   | efg  | efg   | ee   |     |
| Hi07e08x   | 3  | lm                                                  | ll   | lm   | ll   | ll    | ll   | lm   | lm   | lm   | lll  | llm  | lll  | lm   | lm    | lll  | ll    | ll   | lll   | lm    | ll    | lll  | llm   | lm   | lll   | lll  | lll   | lm   |     |
| CH02c02b   | 4  | bc                                                  | bc   | bc   | bd   | ad    | bc   | bd   | bcd  | acd  | bcd  | acd  | acd  | ac   | acd   | ac   | ac    | bc   | bcd   | ad    | bcd   | acd  | bd    | bcd  | bcd   | acd  | acd   | bcd  |     |
| CH05d02    | 4  | ac                                                  | bc   | ac   | ad   | ad    | bd   | ac   | bcd  | bcd  | bcd  | acd  | acd  | bd   | acd   | bd   | ad    | bd   | bcd   | ac    | acd   | acd  | bc    | bcd  | acd   | acd  | acd   | bcd  |     |
| GD162      | 4  | ac                                                  | ad   | ac   | ad   | ad    | bd   | ac   | bcd  | bcd  | bcd  | acd  | acd  | bd   | acd   | bd   | ad    | bd   | bcd   | ad    | acd   | acd  | bc    | bcd  | acd   | acd  | bcd   | bcd  |     |
| Hi04c10x_3 | 4  | bc                                                  | bc   | bc   | bd   | bd    | ad   | bc   | ac-  | c--  | ac-  | c--  | c--  | ad   | c--   | ad   | bc    | ad   | ac-   | bc    | c--   | c--  | ac    | ac-  | c--   | ac-  | ac-   | ac-  |     |
| Hi07b02_4  | 4  | ac                                                  | ac   | ac   | ac   | ad    | ad   | ac   | c--  | ac-  | c--  | ac-  | c--  | bd   | ac-   | bd   | ac    | bd   | c--   | bc    | ac-   | c--  | bd    | c--  | ac-   | c--  | c--   | c--  |     |
| CH04e02    | 4  | ef                                                  | eg   | ef   | eg   | eg    | eg   | ee   | fg   | fg   | ef   | eeg  | eeg  | efg  | efg   | efg  | fg    | fg   | efg   | eg    | eeg   | efg  | ef    | eeg  | eeg   | efg  | efg   | efg  |     |
| CH03a09    | 5  | bc                                                  | ac   | bd   | ac   | bd    | ac   | acd  | bc   | ac   | bc   | bcd  | bcd  | bcd  | acd   | acd  | ad    | bcd  | ac    | acd   | acd   | ad   | bc    | acd  | acd   | bcd  | ac    | acd  |     |
| Hi04d02    | 5  | ad                                                  | ac   | bc   | bd   | ac    | ac   | ac-  | bd   | ad   | ad   | ac-  | c--  | c--  | c--   | ac-  | ad    | c--  | ac    | c--   | c--   | c--  | bc    | bd   | ac-   | ac-  | c--   | ad   | ac- |
| Hi11a03    | 5  | ad                                                  | ac   | bc   | bd   | ac    | ac   | ac-  | bd   | ad   | ad   | ac-  | bc-  | bc-  | ac-   | ac-  | ad    | ac-  | ac    | bc-   | bc-   | bc   | ad    | ac-  | ac-   | bc-  | ad    | ac-  |     |
| CH03a04    | 5  | ef                                                  | fg   | ee   | ee   | fg    | fg   | efg  | ee   | ef   | ee   | efg  | eeg  | eeg  | efg   | efg  | ef    | efg  | fg    | eeg   | eeg   | ee   | ef    | efg  | efg   | eeg  | ef    | efg  |     |
| CH04e03    | 5  | eg                                                  | eg   | fg   | fg   | ee    | ef   | eeg  | fg   | eg   | fg   | eeg  | efg  | efg  | eeg   | efg  | eg    | eeg  | ee    | efg   | efg   | fg   | eg    | eeg  | eeg   | efg  | fg    | eeg  |     |
| CH04g09y   | 5  | eg                                                  | ef   | ee   | eg   | ef    | fg   | efg  | eg   | fg   | fg   | eeg  | eeg  | eeg  | efg   | fg   | eeg   | fg   | eeg   | eg    | eg    | efg  | efg   | efg  | eeg   | fg   | efg   | efg  |     |

| Markers    | LG    | Aneuploid seedlings from the cross of 'CO 2 × RO 6' |      |      |       |      |      |      |      |      |       |      |      |      |      |      |      |      |      |      |      |       |      |      |      |      |       |
|------------|-------|-----------------------------------------------------|------|------|-------|------|------|------|------|------|-------|------|------|------|------|------|------|------|------|------|------|-------|------|------|------|------|-------|
|            |       | CR01                                                | CR02 | CR03 | CR04  | CR05 | CR06 | CR07 | CR08 | CR09 | CR10  | CR11 | CR12 | CR13 | CR14 | CR15 | CR16 | CR17 | CR18 | CR19 | CR20 | CR21  | CR22 | CR23 | CR24 | CR25 | CR26  |
| CH05e06    | 5 eg  | eg                                                  | ee   | fg   | ef    | fg   | efg  | eg   | fg   | eg   | eeg   | eeg  | eeg  | efg  | fg   | eeg  | fg   | eeg  | eeg  | ee   | eg   | efg   | efg  | eeg  | fg   | efg  |       |
| Hi21c08    | 5 eg  | eg                                                  | ee   | eg   | ef    | fg   | efg  | eg   | fg   | fg   | eeg   | eeg  | eeg  | efg  | fg   | efg  | fg   | eeg  | eeg  | ee   | eg   | efg   | efg  | eeg  | fg   | efg  |       |
| CH04h02_2  | 5 h-  | h-                                                  | kk   | hk   | h-    | hk   | hhk  | kk   | h-   | kk   | hkk   | hhk  | hhk  | hkk  | hhk  | hk   | hkk  | hk   | hhk  | hkk  | hk   | hk    | hkk  | hhk  | hkk  | hk   | hhk   |
| CH04h02_4  | 5 h-  | h-                                                  | h-   | h-   | kk    | kk   | hk-  | h-   | h-   | h-   | hk-   | hk-  | hk-  | hk-  | hk-  | h-   | hk-  | kk   | hk-  | hk-  | h-   | h-    | hk-  | hk-  | hk-  | h-   | hk-   |
| CH02a08z   | 5 np  | np                                                  | np   | np   | nn    | nn   | np   | np   | np   | np   | np    | np   | np   | np   | np   | np   | np   | nn   | np   | np   | np   | np    | np   | np   | np   | np   | np    |
| CH03d12    | 6 bc  | ac                                                  | bc   | bd   | bd    | ad   | bcd  | bc   | ad   | ac   | bcd   | ac   | bc   | bcd  | bcd  | bd   | acd  | ac   | ac   | ad   | bd   | bcd   | acd  | bcd  | acd  | acd  | bcd   |
| CH03c01    | 6 fg  | eg                                                  | ef   | ef   | ef    | eg   | eeg  | ef   | eg   | eg   | eeg   | eg   | ef   | efg  | eeg  | ee   | eeg  | eg   | ef   | eg   | ee   | efg   | eeg  | efg  | eeg  | eeg  | efg   |
| CH03d07    | 6 ee  | eg                                                  | ee   | fg   | ef    | eg   | efg  | ee   | fg   | fg   | efg   | ee   | ef   | efg  | efg  | ee   | efg  | ee   | ee   | eg   | fg   | eeg   | efg  | eeg  | eeg  | efg  | efg   |
| Hi01d05    | 6 ef  | eg                                                  | ee   | fg   | fg    | eg   | efg  | ef   | fg   | fg   | efg   | ee   | ef   | efg  | efg  | ef   | efg  | ee   | ee   | eg   | fg   | efg   | eeg  | efg  | eeg  | efg  | efg   |
| AJ000761   | 6 kk  | h-                                                  | h-   | h-   | h-    | h-   | hkk  | h-   | h-   | h-   | hhk   | h-   | kk   | hkk  | hhk  | h-   | hkk  | h-   | h-   | h-   | h-   | hkk   | hhk  | hkk  | hkk  | hhk  | hhk   |
| Hi04c10x_2 | 7 bc  | bd                                                  | bd   | bc   | acd   | ac   | ac   | ad   | ac   | ac   | bcd   | ac   | bd   | bd   | bc   | ac   | bc   | bc   | bd   | ad   | bd   | bcd   | ac   | ac   | bd   | bd   | bcd   |
| Hi05b09    | 7 ee  | eg                                                  | ee   | fg   | eeg   | fg   | eg   | fg   | eg   | fg   | eeg   | ef   | ef   | ee   | ee   | fg   | eg   | ee   | eg   | ef   | eg   | efg   | fg   | fg   | ee   | eg   | efg   |
| CH04e05    | 7 ll  | ll                                                  | ll   | ll   | llm   | lm   | lm   | lm   | lm   | lm   | lll   | llm  | ll   | ll   | ll   | lm   | ll   | ll   | ll   | lm   | ll   | lll   | llm  | llm  | ll   | ll   | lll   |
| CH05b06z_2 | 7 np  | np                                                  | np   | nn   | np1p2 | nn   | nn   | np   | nn   | np   | np1p2 | np   | np   | nn   | nn   | np   | nn   | nn   | np   | np   | nn   | np1p2 | nn   | np   | nn   | nn   | np1p2 |
| CH01c06    | 8 ac  | ad                                                  | bc   | ac   | bd    | ac   | bc   | bc   | ac   | bd   | ad    | ac   | bd   | ac   | bc   | bc   | bc   | ad   | ad   | ac   | bd   | ac    | ac   | ad   | bc   | bc   | ac    |
| CH02g09    | 8 ll  | ll                                                  | llm  | ll   | llm   | ll   | ll   | llm  | ll   | llm  | ll    | ll   | llm  | ll   | llm  | llm  | llm  | ll   | ll   | ll   | llm  | ll    | ll   | ll   | llm  | llm  | ll    |
| Hi04b12    | 8 ll  | ll                                                  | llm  | ll   | llm   | ll   | llm  | ll   | ll   | llm  | ll    | llm  | llm  | ll   | llm  | llm  | llm  | ll   | ll   | ll   | llm  | ll    | ll   | ll   | llm  | llm  | llm   |
| Hi04e05    | 8 np  | nn                                                  | nn   | nn   | np    | np   | nn   | nn   | nn   | np   | np    | nn   | nn   | np   | nn   | nn   | np   | np   | nn   | np   | np   | nn    | nn   | np   | nn   | nn   | nn    |
| Hi23g12    | 8 np  | nn                                                  | nn   | nn   | np    | nn   | nn   | nn   | nn   | np   | np    | nn   | nn   | np   | nn   | nn   | np   | np   | nn   | np   | np   | nn    | nn   | np   | nn   | nn   | nn    |
| CH01h02_1  | 9 bc  | bcd                                                 | bc   | ad   | bcd   | acd  | bc   | ac   | bd   | bcd  | ac    | bcd  | acd  | ad   | bc   | bcd  | bd   | bcd  | acd  | bcd  | bcd  | acd   | bcd  | ad   | bcd  | bcd  | bcd   |
| GD142      | 9 ad  | acd                                                 | ad   | bc   | bcd   | acd  | bc   | bc   | ad   | bcd  | ac    | bcd  | bcd  | bd   | ac   | bcd  | ac   | bcd  | acd  | acd  | acd  | acd   | acd  | ac   | acd  | acd  | acd   |
| Hi01d01    | 9 bd  | bcd                                                 | bd   | ac   | bcd   | acd  | bd   | ad   | bc   | bcd  | ad    | bcd  | acd  | ac   | bd   | bcd  | bc   | bcd  | acd  | bcd  | bcd  | acd   | acd  | ac   | bcd  | bcd  | bcd   |
| CH05c07    | 9 fg  | efg                                                 | fg   | eg   | efg   | eeg  | fg   | eg   | ef   | efg  | fg    | efg  | eeg  | ee   | fg   | efg  | ef   | efg  | eeg  | efg  | efg  | efg   | efg  | ee   | efg  | efg  | efg   |
| NH029a     | 9 ef  | eg-                                                 | fg   | eg   | efg   | eeg  | fg   | eg   | ef   | efg  | fg    | eeg  | eeg  | ee   | fg   | eeg  | ef   | efg  | eeg  | efg  | efg  | efg   | efg  | eg   | efg  | efg  | efg   |
| Hi05e07    | 9 hh  | hk-                                                 | hh   | k-   | hhk   | hkk  | hh   | hk   | k-   | hhk  | hh    | hkk  | hhk  | k-   | hh   | hkk  | k-   | hhk  | hhk  | hkk  | hhk  | hhk   | hkk  | k-   | hkk  | hhk  | hkk   |
| CH01h02_2  | 9 llm | llm                                                 | llm  | ll   | llm   | lll  | llm  | ll   | llm  | llm  | ll    | llm  | lll  | ll   | llm  | llm  | llm  | llm  | lll  | llm  | llm  | lll   | lll  | ll   | llm  | llm  | llm   |
| CH05d08y_2 | 9 ll  | lll                                                 | ll   | llm  | lll   | llm  | ll   | llm  | ll   | lll  | ll    | lll  | lll  | llm  | ll   | lll  | ll   | lll  | llm  | lll  | llm  | llm   | lll  | llm  | lll  | lll  | lll   |
| CH01f07a   | 10 a  | bc                                                  | ac   | ad   | bcd   | bcd  | bc   | bcd  | bcd  | bcd  | bd    | acd  | bcd  | bc   | bd   | bcd  | bcd  | bcd  | bcd  | bd   | acd  | bcd   | bcd  | ac   | acd  | acd  | bcd   |
| CH01f12    | 10 a  | ad                                                  | bd   | ac   | acd   | acd  | ac   | bcd  | acd  | bcd  | ac    | bcd  | acd  | bd   | bc   | acd  | acd  | acd  | acd  | ac   | acd  | acd   | acd  | bd   | bcd  | acd  | bcd   |
| CH02b03b   | 10 a  | bc                                                  | ac   | ad   | bcd   | bcd  | bc   | bcd  | bcd  | bcd  | bd    | acd  | bcd  | bc   | bd   | bcd  | bcd  | bcd  | bcd  | bd   | acd  | bcd   | bcd  | ac   | acd  | bcd  | bcd   |
| CH02b07    | 10 b  | ac                                                  | ad   | bc   | bcd   | bcd  | bd   | acd  | acd  | bcd  | bc    | acd  | bcd  | bd   | ac   | bcd  | bcd  | bcd  | bcd  | ac   | acd  | bcd   | bcd  | ad   | bcd  | acd  | acd   |
| Hi02d04    | 10 b  | ac                                                  | ac   | bd   | bcd   | bcd  | bc   | acd  | acd  | bcd  | bd    | acd  | bcd  | bc   | ad   | bcd  | acd  | acd  | bcd  | ad   | acd  | bcd   | bcd  | bc   | bcd  | acd  | acd   |
| MS06g03    | 10 a  | bc                                                  | ac   | ad   | bcd   | bcd  | bc   | bcd  | bcd  | bcd  | ad    | acd  | bcd  | bc   | bd   | bcd  | bcd  | bcd  | bcd  | bd   | acd  | acd   | bcd  | bc   | acd  | bcd  | bcd   |
| CH04c06y_1 | 10 l  | ll                                                  | ll   | llm  | llm   | llm  | llm  | lll  | lll  | llm  | llm   | lll  | llm  | llm  | ll   | llm  | llm  | lll  | llm  | llm  | lll  | llm   | llm  | ll   | llm  | lll  | lll   |

| Markers    | LG     | Aneuploid seedlings from the cross of 'CO 2 × RO 6' |      |      |       |       |      |       |       |       |      |       |       |      |      |       |       |       |       |      |       |       |       |      |       |       |       |       |
|------------|--------|-----------------------------------------------------|------|------|-------|-------|------|-------|-------|-------|------|-------|-------|------|------|-------|-------|-------|-------|------|-------|-------|-------|------|-------|-------|-------|-------|
|            |        | CR01                                                | CR02 | CR03 | CR04  | CR05  | CR06 | CR07  | CR08  | CR09  | CR10 | CR11  | CR12  | CR13 | CR14 | CR15  | CR16  | CR17  | CR18  | CR19 | CR20  | CR21  | CR22  | CR23 | CR24  | CR25  | CR26  | CR27  |
| CH02a10    | 10 n   | np                                                  | np   | nn   | np1p2 | np1p2 | nn   | np1p2 | np1p2 | np1p2 | nn   | np1p2 | np1p2 | np   | nn   | np1p2 | np1p2 | np1p2 | np1p2 | nn   | np1p2 | np1p2 | np1p2 | np   | np1p2 | np1p2 | np1p2 | np1p2 |
| CH02c11    | 10 n   | np                                                  | np   | nn   | np1p2 | np1p2 | nn   | np1p2 | np1p2 | np1p2 | nn   | np1p2 | np1p2 | np   | np   | np1p2 | np1p2 | np1p2 | np1p2 | nn   | np1p2 | np1p2 | np1p2 | np   | np1p2 | np1p2 | np1p2 | np1p2 |
| CH03d11    | 10 n   | np                                                  | nn   | np   | np1p2 | np1p2 | np   | np1p2 | np1p2 | np1p2 | np   | np1p2 | np1p2 | nn   | np   | np1p2 | np1p2 | np1p2 | np1p2 | np   | np1p2 | np1p2 | np1p2 | nn   | np1p2 | np1p2 | np1p2 | np1p2 |
| Hi04f08    | 10 n   | np                                                  | nn   | np   | nnp   | nnp   | np   | nnp   | nnp   | nnp   | np   | nnp   | nnp   | nn   | np   | nnp   | nnp   | nnp   | nnp   | np   | nnp   | nnp   | nnp   | nn   | nnp   | nnp   | nnp   | nnp   |
| MS02a01    | 10 n   | nn                                                  | nn   | np   | np1p2 | np1p2 | nn   | np1p2 | np1p2 | np1p2 | np   | np1p2 | np1p2 | nn   | np   | np1p2 | np1p2 | np1p2 | np1p2 | np   | np1p2 | np1p2 | np1p2 | nn   | np1p2 | np1p2 | np1p2 | np1p2 |
| CH02d08    | 11 ad  | bd                                                  | bd   | ac   | bd    | bc    | acd  | bd    | acd   | bc    | ac   | ac    | bc    | ad   | acd  | bd    | ad    | bcd   | ad    | ad   | ac    | bcd   | ac    | bc   | acd   | ac    | ad    | ad    |
| CH04g07    | 11 ad  | bd                                                  | ac   | ad   | ad    | ac    | bcd  | bc    | bcd   | ac    | bc   | bc    | ac    | bd   | acd  | ad    | bc    | acd   | bd    | bd   | bc    | acd   | bc    | ac   | bcd   | bc    | bc    | bc    |
| CH04h02_1  | 11 ac  | ac                                                  | ac   | bd   | ad    | bd    | c--  | ac    | ac-   | ad    | ac   | bd    | bd    | bc   | c--  | bc    | bc    | c--   | ac    | bc   | bd    | c--   | bd    | ad   | ac-   | bd    | bc    | bc    |
| Hi06b06    | 11 ac  | bc                                                  | ad   | ac   | ac    | ad    | bcd  | bd    | bcd   | ad    | bd   | bd    | ad    | bc   | acd  | ac    | bd    | acd   | bc    | bc   | bd    | acd   | bd    | ad   | bcd   | bd    | ad    | ad    |
| CH04h02_3  | 11 nn  | nn                                                  | nn   | np   | np    | np    | nnp  | nn    | nnp   | np    | nn   | np    | np    | nn   | nnp  | nn    | nn    | nnp   | nn    | nn   | np    | nnp   | np    | np   | nnp   | np    | nn    | nn    |
| CH05d04    | 12 bd  | ac                                                  | bd   | ac-  | bc    | ac    | ac-  | bc-   | ac    | ac    | ac   | ad    | bc-   | bd   | bc   | bd    | bc-   | bc-   | ac-   | ac   | ac-   | bc    | bd    | bc-  | ac-   | bc    | bd    | bd    |
| CH05d11    | 12 bc  | bc                                                  | ad   | ac-  | ac    | bc    | ac-  | bc-   | bc    | bd    | bc   | ad    | ac-   | bd   | ac   | ad    | bc-   | ac-   | ac-   | bc   | bc-   | ac    | ad    | ac-  | bc-   | ac    | ad    | ad    |
| NZ28f04    | 12 ad  | ad                                                  | bc   | bcd  | bd    | ad    | acd  | bcd   | ad    | ac    | ad   | bc    | bcd   | ac   | bd   | bc    | acd   | bcd   | bcd   | ad   | acd   | bd    | bc    | bcd  | acd   | bd    | bc    | bc    |
| CH01f02    | 12 ee  | ee                                                  | ef   | efg  | ee    | ef    | efg  | eeg   | ee    | eg    | ee   | fg    | efg   | eg   | ef   | fg    | eeg   | efg   | efg   | ee   | eeg   | ef    | fg    | efg  | eeg   | ef    | eg    | eg    |
| CH01g12    | 12 ee  | ee                                                  | fg   | efg  | ef    | ee    | efg  | eeg   | ee    | eg    | ee   | fg    | efg   | eg   | ef   | fg    | eeg   | efg   | efg   | ee   | eeg   | ef    | fg    | efg  | eeg   | ef    | fg    | fg    |
| CH01b12y   | 12 hk  | kk                                                  | hh   | hk-  | kk    | hk    | hk-  | hk    | hk    | hk    | hk   | hk    | hk-   | hk   | kk   | kk    | hk-   | hk-   | hk-   | hk   | hk-   | hh    | hk    | hk-  | hk-   | hh    | kk    | kk    |
| CH03h03z_2 | 12 nn  | nn                                                  | np   | np1p | nn    | nn    | np1p | np1   | nn    | np    | nn   | np    | np1   | np   | nn   | np    | np1p  | np1   | np1p  | nn   | np1   | nn    | np    | np1p | np1p  | nn    | np    | np    |
| CH03a08    | 13 ac  | bd                                                  | bc   | ad   | bc    | acd   | bcd  | acd   | bcd   | bc    | bd   | bcd   | ac    | ac   | bd   | acd   | acd   | acd   | bcd   | bcd  | bcd   | ad    | bc    | ad   | bc    | bd    | bcd   | bcd   |
| CH03h03z_1 | 13 bc  | ad                                                  | ac   | bd   | ac    | c--   | ac-  | c--   | ac-   | ac    | ad   | ac-   | bc    | bc   | ad   | c--   | c--   | c--   | ac-   | ac-  | ac-   | bd    | ac    | bd   | ac    | ad    | ac-   | ac-   |
| CH05h05    | 13 ad  | ac                                                  | ac   | ad   | ac    | acd   | acd  | acd   | acd   | ac    | bd   | acd   | ac    | bc   | ad   | acd   | bcd   | acd   | bcd   | acd  | bcd   | ac    | ac    | ad   | ac    | bd    | acd   | acd   |
| Hi05c06_2  | 13 bc  | ad                                                  | ad   | ad   | bc    | ac-   | ac-  | ac-   | bc-   | ac    | bd   | c--   | bc    | bc   | bd   | c--   | ac-   | ac-   | ac-   | ac-  | c--   | ad    | bc    | ad   | bc    | bd    | ac-   | ac-   |
| Hi20b03    | 13 ac  | ac                                                  | bd   | ac   | ad    | acd   | bcd  | acd   | bcd   | bd    | bc   | bcd   | ad    | bd   | bc   | acd   | bcd   | acd   | bcd   | bcd  | bcd   | ac    | bd    | ac   | bd    | bc    | bcd   | bcd   |
| NH009b     | 13 ac  | ac                                                  | bd   | ac   | ad    | acd   | bcd  | acd   | bcd   | bd    | bc   | bcd   | ad    | bd   | bc   | acd   | bcd   | acd   | bcd   | bcd  | bcd   | ac    | bd    | ac   | bd    | bc    | bcd   | bcd   |
| CH05c06_1  | 13 hk  | hk                                                  | hk   | hk   | kk    | hk-   | hk-  | hk-   | hk-   | hk    | hh   | hk-   | kk    | hk   | hk   | hk-   | hk-   | hk-   | hk-   | hk-  | hk-   | kk    | hk    | hk   | hh    | hh    | hk-   | hk-   |
| CH05f04    | 13 k-  | hk                                                  | hk   | k-   | hk    | hkk   | hkk  | hkk   | hkk   | hk    | hh   | hkk   | k-    | k-   | hk   | hkk   | hkk   | hkk   | hkk   | hkk  | hkk   | hkk   | k-    | hk   | k-    | hk    | hh    | hkk   |
| GD147      | 13 kk  | kk                                                  | h-   | kk   | hk    | hkk   | hkk  | hkk   | hkk   | h-    | h-   | hkk   | hk    | hk   | h-   | hkk   | hkk   | hkk   | hkk   | hkk  | hkk   | hkk   | kk    | h-   | kk    | hk    | h-    | hkk   |
| Hi03e04    | 13 h-  | h-                                                  | hk   | h-   | h-    | hkk   | hkk  | hkk   | hkk   | hk    | kk   | hkk   | h-    | h-   | kk   | hkk   | hkk   | hkk   | hkk   | hkk  | hkk   | h-    | hk    | h-   | hk    | kk    | hkk   | hkk   |
| AU223486   | 13 ll  | ll                                                  | ll   | ll   | ll    | lll   | lll  | lll   | lll   | ll    | llm  | lll   | ll    | llm  | ll   | lll   | llm   | lll   | llm   | lll  | llm   | lll   | llm   | ll   | llm   | ll    | llm   | llm   |
| Hi07b02_3  | 13 ll  | llm                                                 | ll   | llm  | llm   | llm   | llm  | llm   | lll   | ll    | ll   | lll   | llm   | ll   | ll   | llm   | lll   | llm   | lll   | llm  | lll   | llm   | lll   | llm  | ll    | llm   | ll    | lll   |
| NZ03c01x_2 | 13 llm | llm                                                 | ll   | llm  | ll    | llm   | lll  | llm   | lll   | ll    | ll   | lll   | llm   | llm  | llm  | llm   | llm   | llm   | lll   | lll  | lll   | ll    | ll    | llm  | ll    | llm   | lll   | lll   |
| CH01g05    | 14 bc  | bc                                                  | ac   | ad   | bcd   | bd    | acd  | ac    | ac    | bcd   | ad   | bd    | ac    | bd   | ad   | bcd   | bcd   | bc    | acd   | bcd  | bd    | bcd   | bcd   | ac   | ac    | acd   | bcd   | bcd   |
| CH03a02    | 14 ac  | ac                                                  | bc   | bc   | acd   | ad    | bcd  | bc    | bc    | acd   | bc   | ac    | bc    | ad   | bd   | acd   | acd   | ac    | bcd   | acd  | ad    | acd   | acd   | bc   | bc    | bcd   | acd   | acd   |
| CH03d08    | 14 bc  | bc                                                  | ac   | ad   | bcd   | bd    | acd  | ac    | ac    | bcd   | ad   | bd    | ac    | bd   | ad   | bcd   | bcd   | bc    | acd   | bcd  | bd    | bcd   | bcd   | ac   | ac    | acd   | bcd   | bcd   |

| Markers    | LG | Aneuploid seedlings from the cross of 'CO 2 × RO 6' |      |      |       |       |       |       |       |       |       |      |       |       |      |      |       |       |       |       |      |       |       |                    |       |       |       |       |     |
|------------|----|-----------------------------------------------------|------|------|-------|-------|-------|-------|-------|-------|-------|------|-------|-------|------|------|-------|-------|-------|-------|------|-------|-------|--------------------|-------|-------|-------|-------|-----|
|            |    | CR01                                                | CR02 | CR03 | CR04  | CR05  | CR06  | CR07  | CR08  | CR09  | CR10  | CR11 | CR12  | CR13  | CR14 | CR15 | CR16  | CR17  | CR18  | CR19  | CR20 | CR21  | CR22  | CR23               | CR24  | CR25  | CR26  | CR27  |     |
| CH05g07z_1 | 14 | ac                                                  | ac   | bc   | bd    | c--   | ad    | c--   | ac    | ac    | ac-   | ad   | bd    | bc    | ad   | bd   | c--   | ac-   | bc    | c--   | ac-  | ad    | c--   | c--                | bc    | ac    | c--   | c--   |     |
| CH05g07z_2 | 14 | n                                                   | np   | np   | nn    | np1p2 | np1p2 | nn    | np1p2 | np1p2 | np1p2 | nn   | np1p2 | np1p2 | np   | nn   | np1p2 | np1p2 | np1p2 | np1p2 | nn   | np1p2 | np1p2 | np1p2 <sup>1</sup> | np    | np1p2 | np1p2 | np1p2 |     |
| CH02c02a_1 | 15 | n                                                   | np   | np   | nn    | np1p2 | np1p2 | nn    | np1p2 | np1p2 | np1p2 | nn   | np1p2 | np1p2 | np   | np   | np1p2 | np1p2 | np1p2 | np1p2 | nn   | np1p2 | np1p2 | np1p2              | np    | np1p2 | np1p2 | np1p2 |     |
| CH02d11    | 15 | n                                                   | np   | nn   | np    | np1p2 | np1p2 | np    | np1p2 | np1p2 | np1p2 | np   | np1p2 | np1p2 | nn   | np   | np1p2 | np1p2 | np1p2 | np1p2 | np   | np1p2 | np1p2 | np1p2              | nn    | np1p2 | np1p2 | np1p2 |     |
| CH03b10    | 15 | n                                                   | np   | nn   | np    | nnp   | nnp   | np    | nnp   | nnp   | nnp   | np   | nnp   | nnp   | nn   | np   | nnp   | nnp   | nnp   | nnp   | np   | nnp   | nnp   | nnp                | nn    | nnp   | nnp   | nnp   |     |
| Hi04c05    | 15 | n                                                   | nn   | nn   | np    | np1p2 | np1p2 | nn    | np1p2 | np1p2 | np1p2 | np   | np1p2 | np1p2 | nn   | np   | np1p2 | np1p2 | np1p2 | np1p2 | np   | np1p2 | np1p2 | np1p2              | nn    | np1p2 | np1p2 | np1p2 |     |
| Hi06f09    | 15 | ad                                                  | bd   | bd   | ac    | bd    | bc    | acd   | bd    | acd   | bc    | ac   | ac    | bc    | ad   | acd  | bd    | ad    | bcd   | ad    | ad   | ac    | bcd   | ac                 | bc    | acd   | ac    | ad    |     |
| CH02c09    | 15 | ad                                                  | bd   | ac   | ad    | ad    | ac    | bcd   | bc    | bcd   | ac    | bc   | bc    | ac    | bd   | acd  | ad    | bc    | acd   | bd    | bd   | bc    | acd   | bc                 | ac    | bcd   | bc    | bc    |     |
| NZ02b01    | 15 | ac                                                  | ac   | ac   | bd    | ad    | bd    | c--   | ac    | ac-   | ad    | ac   | bd    | bd    | bc   | c--  | bc    | bc    | c--   | ac    | bc   | bd    | c--   | bd                 | ad    | ac-   | bd    | bc    |     |
| Hi02g06    | 15 | ac                                                  | bc   | ad   | ac    | ac    | ad    | bcd   | bd    | bcd   | ad    | bd   | bd    | ad    | bc   | acd  | ac    | bd    | acd   | bc    | bc   | bd    | acd   | bd                 | ad    | bcd   | bd    | ad    |     |
| CH05a04    | 16 | nn                                                  | nn   | nn   | np    | np    | np    | nnp   | nn    | nnp   | np    | nn   | np    | np    | nn   | nnp  | nn    | nn    | nnp   | nn    | nn   | np    | nnp   | np                 | np    | nnp   | np    | nn    |     |
| CH05c06_2  | 16 | bd                                                  | ac   | bd   | ac-   | bc    | ac    | ac-   | bc-   | ac    | ac    | ac   | ad    | bc-   | bd   | bc   | bd    | bc-   | bc-   | ac-   | ac   | ac-   | bc    | bd                 | bc-   | ac-   | bc    | bd    |     |
| Hi01c11x   | 16 | bc                                                  | bc   | ad   | ac-   | ac    | bc    | ac-   | bc-   | bc    | bd    | bc   | ad    | ac-   | bd   | ac   | ad    | bc-   | ac-   | ac-   | bc   | bc-   | ac    | ad                 | ac-   | bc-   | ac    | ad    |     |
| Hi01d06y   | 16 | ad                                                  | ad   | bc   | bcd   | bd    | ad    | acd   | bcd   | ad    | ac    | ad   | bc    | bcd   | ac   | bd   | bc    | acd   | bcd   | bcd   | ad   | acd   | bd    | bc                 | bcd   | acd   | bd    | bc    |     |
| Hi04e04    | 16 | ee                                                  | ee   | ef   | efg   | ee    | ef    | efg   | eeg   | ee    | eg    | ee   | fg    | efg   | eg   | ef   | fg    | eeg   | efg   | efg   | ee   | eeg   | ef    | fg                 | efg   | eeg   | ef    | eg    |     |
| CH02d10a   | 16 | ee                                                  | ee   | fg   | efg   | ef    | ee    | efg   | eeg   | ee    | eg    | ee   | fg    | efg   | eg   | ef   | fg    | eeg   | efg   | efg   | ee   | eeg   | ef    | fg                 | efg   | eeg   | ef    | fg    |     |
| CH05b06z_1 | 16 | hk                                                  | kk   | hh   | hk-   | kk    | hk    | hk-   | hk-   | hk    | hk    | hk   | hk    | hk-   | hk   | kk   | kk    | hk-   | hk-   | hk-   | hk   | hk-   | hh    | hk                 | hk-   | hk-   | hh    | kk    |     |
| CH04f10    | 16 | nn                                                  | nn   | np   | np1p2 | nn    | nn    | np1p2 | np1p2 | nn    | np    | nn   | np    | np1p2 | np   | nn   | np    | np1p2 | np1p2 | np1p2 | nn   | np1p2 | nn    | np                 | np1p2 | np1p2 | nn    | np    |     |
| CH01h01    | 17 | ac                                                  | bd   | bc   | ad    | bc    | acd   | bcd   | acd   | bcd   | bc    | bd   | bcd   | ac    | ac   | bd   | acd   | acd   | acd   | bcd   | bcd  | bcd   | ad    | bc                 | ad    | bc    | bd    | bcd   |     |
| CH05d08y_1 | 17 | bc                                                  | ad   | ac   | bd    | ac    | c--   | ac-   | c--   | ac-   | ac    | ad   | ac-   | bc    | bc   | ad   | c--   | c--   | c--   | ac-   | ac-  | ac-   | bd    | ac                 | bd    | ac    | ad    | ac-   |     |
| CH05g03    | 17 | ad                                                  | ac   | ac   | ad    | ac    | acd   | acd   | acd   | acd   | ac    | bd   | acd   | ac    | bc   | ad   | acd   | bcd   | acd   | bcd   | acd  | bcd   | ac    | ac                 | ad    | ac    | bd    | acd   |     |
| Hi07b02_1  | 17 | bc                                                  | ad   | ad   | ad    | bc    | ac-   | ac-   | ac-   | bc-   | ac    | bd   | c--   | bc    | bc   | bd   | c--   | ac-   | ac-   | ac-   | ac-  | c--   | ad    | bc                 | ad    | bc    | bd    | ac-   |     |
| CH04c06y_2 | 17 | ac                                                  | ac   | bd   | ac    | ad    | acd   | bcd   | acd   | bcd   | bd    | bc   | bcd   | ad    | bd   | bc   | acd   | bcd   | acd   | bcd   | bcd  | bcd   | ac    | bd                 | ac    | bd    | bc    | bcd   |     |
| CH04c06y_3 | 17 | ac                                                  | ac   | bd   | ac    | ad    | acd   | bcd   | acd   | bcd   | bd    | bc   | bcd   | ad    | bd   | bc   | acd   | bcd   | acd   | bcd   | bcd  | bcd   | ac    | bd                 | ac    | bd    | bc    | bcd   |     |
| Hi05c06_1  | 17 | hk                                                  | hk   | hk   | hk    | kk    | hk-   | hk-   | hk-   | hk-   | hk    | hh   | hk-   | kk    | hk   | hk   | hk-   | hk-   | hk-   | hk-   | hk-  | hk-   | kk    | hk                 | hk    | hh    | hh    | hk-   |     |
| GD96       | 17 | k-                                                  | hk   | hk   | k-    | hk    | hkk   | hkk   | hkk   | hkk   | hk    | hh   | hkk   | k-    | k-   | hk   | hkk   | hkk   | hkk   | hkk   | hkk  | hkk   | k-    | hk                 | k-    | hk    | hh    | hkk   |     |
| Hi03c05    | 17 | kk                                                  | kk   | h-   | kk    | hk    | hkk   | hkk   | hkk   | hkk   | h-    | h-   | hkk   | hk    | hk   | h-   | hkk   | hkk   | hkk   | hkk   | hkk  | hkk   | hkk   | kk                 | h-    | kk    | hk    | h-    | hkk |
| Hi07b02_2  | 17 | h-                                                  | h-   | hk   | h-    | h-    | hkk   | hkk   | hkk   | hkk   | hk    | kk   | hkk   | h-    | h-   | kk   | hkk   | hkk   | hkk   | hkk   | hkk  | hkk   | h-    | hk                 | h-    | hk    | kk    | hkk   |     |

Note: '-' represents a null allele, or missing data; 'p1' and 'p2' are con-dominant alleles
