# Supplementary material for: Molecular Genetic Features of Polyploidization and Aneuploidization Reveal Unique Patterns for Genome Duplication in Diploid Malus
Source: PubMed Central journal article supplement (PMC3254611; doi:10.1371/journal.pone.0029449), 2012-01-10
Supplement: pone.0029449.s009.pdf [file pone.0029449.s009.pdf]

|            |    | Triploid seedlings from the crosses of 'Gala × Fuji' and 'M 26 × Fu 2' |       |       |       |       |       |       |       |       |       |       |       |       |       |             |        |        |        |        |
|------------|----|------------------------------------------------------------------------|-------|-------|-------|-------|-------|-------|-------|-------|-------|-------|-------|-------|-------|-------------|--------|--------|--------|--------|
| Markers    | LG | Gala × Fuji                                                            |       |       |       |       |       |       |       |       |       |       |       |       |       | M 26 × Fu 2 |        |        |        |        |
|            |    | GF41                                                                   | GF42  | GF43  | GF44  | GF45  | GF46  | GF47  | GF48  | GF49  | GF50  | GF51  | GF52  | GF53  | GF54  | GF55        | M26F24 | M26F25 | M26F26 | M26F27 |
| CH05g08    | 1  | abd                                                                    | abc   | abd   | abd   | abc   | abc   | abd   | abd   | abd   | abd   | abc   | abd   | abd   | abc   | abd         | abc    | abd    | abc    | abd    |
| Hi02b10    | 1  | nnn                                                                    | nnn   | nnp   | nnp   | nnn   | nnp   | nnp   | nnp   | nnp   | nnp   | nnn   | nnn   | nnn   | nnn   | nnp         |        |        |        |        |
| Hi02c07    | 1  | lm1m2                                                                  | lm1m2 | lm1m2 | lm1m2 | lm1m2 | lm1m2 | lm1m2 | lm1m2 | lm1m2 | lm1m2 | lm1m2 | lm1m2 | lm1m2 | lm1m2 | lm1m2       | lm1m2  | lm1m2  | lm1m2  | lm1m2  |
| Hi07d08    | 1  | abc                                                                    | abc   | abc   | abc   | abd   | abd   | abc   | abc   | abd   | abc   | abd   | abc   | abc   | abd   | abc         |        |        |        |        |
| Hi12c02    | 1  | abd                                                                    | abd   | abd   | abd   | abd   | abd   | abc   | abc   | abd   | abd   | abd   | abd   | abd   | abd   | abd         |        |        |        |        |
| KA4B       | 1  | hkk                                                                    | hkk   | hhk   | hkk   | hkk   | hhk   | hhk   | hhk   | hhk   | hkk   | hkk   | hhk   | hkk   | hhk   |             |        |        |        |        |
| CH02a04z   | 2  | abd                                                                    | abc   | abd   | abc   | abd   | abd   | abd   | abd   | abc   | abd   | abc   | abd   | abd   | abc   |             |        |        |        |        |
| CH02c02a_2 | 2  | lm1m2                                                                  | lm1m2 | lm1m2 | lm1m2 | lm1m2 | lm1m2 | lm1m2 | lm1m2 | lm1m2 | lm1m2 | lm1m2 | lm1m2 | lm1m2 | lm1m2 | lm1m2       | lm1m2  | lm1m2  | lm1m2  | lm1m2  |
| CH02c02a_3 | 2  | abc                                                                    | abc   | abc   | abc   | abd   | abd   | abc   | abc   | abd   | abc   | abd   | abc   | abc   | abd   | abc         |        |        |        |        |
| CH02c06    | 2  | abd                                                                    | abc   | abc   | abc   | abd   | abc   | abc   | abc   | abc   | abd   | abc   | abc   | abc   | abd   | abc         |        |        |        |        |
| CH03d01    | 2  | abd                                                                    | abc   | abd   | abc   | abc   | abd   | abd   | abd   | abd   | abc   | abd   | abc   | abd   | abd   | abc         |        |        |        |        |
| CH03d10    | 2  | lm1m2                                                                  | lm1m2 | lm1m2 | lm1m2 | lm1m2 | lm1m2 | lm1m2 | lm1m2 | lm1m2 | lm1m2 | lm1m2 | lm1m2 | lm1m2 | lm1m2 | lm1m2       | lm1m2  | lm1m2  | lm1m2  | lm1m2  |
| CH05e03    | 2  | abd                                                                    | abc   | abd   | abd   | abc   | abd   | abc   | abd   | abd   | abc   | abd   | abc   | abd   | abd   | abc         |        |        |        |        |
| CN493139   | 2  | abc                                                                    | abd   | abc   | abc   | abd   | abc   | abc   | abc   | abc   | abd   | abc   | abc   | abc   | abd   | abd         |        |        |        |        |
| Hi02a07    | 2  | abc                                                                    | abd   | abc   | abd   | abd   | abc   | abc   | abc   | abc   | abd   | abc   | abd   | abc   | abc   | abd         |        |        |        |        |
| Hi05c06_3  | 2  | nnn                                                                    | nnp   | nnn   | nnp   | nnp   | nnn   | nnn   | nnn   | nnp   | nnn   | nnp   | nnn   | nnp   | nnp   | nnp         |        |        |        |        |
| AU223657   | 3  | lm1m2                                                                  | lm1m2 | lm1m2 | lm1m2 | lm1m2 | lm1m2 | lm1m2 | lm1m2 | lm1m2 | lm1m2 | lm1m2 | lm1m2 | lm1m2 | lm1m2 | lm1m2       | lm1m2  | lm1m2  | lm1m2  | lm1m2  |
| CH03e03    | 3  | abd                                                                    | abd   | abc   | abd   | abc   | abc   | abd   | abd   | abd   | abc   | abc   | abc   | abc   | abc   | abc         |        |        |        |        |
| CH03g07    | 3  | abc                                                                    | abc   | abd   | abd   | abc   | abc   | abc   | abc   | abc   | abd   | abd   | abc   | abd   | abc   | abd         |        |        |        |        |
| HGA8bY     | 3  | abd                                                                    | abc   | abc   | abc   | abc   | abd   | abc   | abc   | abd   | abc   | abc   | abc   | abc   | abd   | abc         |        |        |        |        |
| Hi04c10x_1 | 3  | abd                                                                    | abd   | abc   | abc   | abc   | abc   | abd   | abd   | abd   | abc   | abc   | abc   | abc   | abc   | abc         |        |        |        |        |
| Hi07e08x   | 3  | abc                                                                    | abc   | abd   | abd   | abd   | abd   | abc   | abc   | abc   | abd   | abd   | abd   | abd   | abd   | abd         |        |        |        |        |
| CH02c02b   | 4  | abd                                                                    | abc   | abd   | abc   | abc   | abd   | abd   | abd   | abd   | abc   | abd   | abc   | abd   | abd   | abc         |        |        |        |        |
| CH04e02    | 4  | efg                                                                    | efg   | eef   | eef   | eef   | eef   | efg   | eef   | eef   | eef   | efg   | efg   | eef   | efg   | eef         |        |        |        |        |
| CH05d02    | 4  | abc                                                                    | abc   | abc   | abd   | abd   | abd   | abc   | abd   | abd   | abd   | abc   | abd   | abc   | abc   | abc         |        |        |        |        |
| GD162      | 4  | abd                                                                    | abd   | abc   | abc   | abc   | abc   | abd   | abc   | abc   | abc   | abd   | abd   | abc   | abd   | abd         |        |        |        |        |
| Hi04c10x_3 | 4  | abc                                                                    | abc   | abc   | abd   | abd   | abd   | abc   | abd   | abc   | abd   | abc   | abd   | abd   | abc   | abd         |        |        |        |        |
| Hi07b02_4  | 4  | eef                                                                    | eef   | eef   | efg   | efg   | efg   | eef   | efg   | efg   | efg   | eef   | efg   | efg   | eef   | efg         |        |        |        |        |
| CH02a08z   | 5  | nnn                                                                    | nnp   | nnn   | nnp   | nnp   | nnn   | nnp   | nnp   | nnp   | nnn   | nnp   | nnp   | nnp   | nnn   | nnp         |        |        |        |        |
| CH03a04    | 5  | abd                                                                    | abc   | abd   | abc   | abd   | abc   | abc   | abd   | abd   | abd   | abc   | abd   | abc   | abd   | abc         |        |        |        |        |
| CH03a09    | 5  | eef                                                                    | efg   | eef   | efg   | eef   | efg   | efg   | eef   | efg   | eef   | efg   | efg   | efg   | eef   | efg         |        |        |        |        |
| CH04e03    | 5  | eef                                                                    | efg   | eef   | efg   | efg   | eef   | efg   | efg   | efg   | eef   | eef   | efg   | efg   | eef   | efg         |        |        |        |        |
| CH04g09y   | 5  | abd                                                                    | abc   | abd   | abc   | abd   | abd   | abc   | abc   | abd   | abc   | abc   | abc   | abc   | abd   | abc         |        |        |        |        |

| Triploid seedlings from the crosses of 'Gala × Fuji' and 'M 26 × Fu 2' |    |             |       |       |       |       |       |       |       |       |       |       |       |       |       |             |        |        |        |
|------------------------------------------------------------------------|----|-------------|-------|-------|-------|-------|-------|-------|-------|-------|-------|-------|-------|-------|-------|-------------|--------|--------|--------|
| Markers                                                                | LG | Gala × Fuji |       |       |       |       |       |       |       |       |       |       |       |       |       | M 26 × Fu 2 |        |        |        |
|                                                                        |    | GF41        | GF42  | GF43  | GF44  | GF45  | GF46  | GF47  | GF48  | GF49  | GF50  | GF51  | GF52  | GF53  | GF54  | GF55        | M26F24 | M26F25 | M26F26 |
| CH04h02_2                                                              | 5  | hk-         | hk-   | hk-   | hk-   | hk-   | hk-   | hk-   | hk-   | hk-   | hk-   | hk-   | hk-   | hk-   | hk-   | hkk         | hhk    | hkk    | hkk    |
| CH04h02_4                                                              | 5  | hk-         | hk-   | hk-   | hk-   | hk-   | hk-   | hk-   | hk-   | hk-   | hk-   | hk-   | hk-   | hk-   | hk-   | hk-         | hk-    | hk-    | hk-    |
| CH05e06                                                                | 5  | abc         | abd   | abc   | abd   | abd   | abc   | abd   | abd   | abc   | abd   | abd   | abd   | abc   | abd   | abd         | abd    | abd    | abc    |
| Hi04d02                                                                | 5  | hkk         | hkk   | hhk   | hkk   | hkk   | hkk   | hkk   | hhk   | hkk   | hkk   | hkk   | hkk   | hhk   | hhk   | abc         | abc    | abc    | abd    |
| Hi11a03                                                                | 5  | hk-         | hk-   | hk-   | hk-   | hk-   | hk-   | hk-   | hk-   | hk-   | hk-   | hk-   | hk-   | hk-   | hk-   | abd         | abd    | abd    | abc    |
| Hi21c08                                                                | 5  | hk-         | hk-   | hk-   | hk-   | hk-   | hk-   | hk-   | hk-   | hk-   | hk-   | hk-   | hk-   | hk-   | hk-   | hkk         | hhk    | hkk    | hkk    |
| AJ000761                                                               | 6  | hk-         | hk-   | hk-   | hk-   | hk-   | hk-   | hk-   | hk-   | hk-   | hk-   | hk-   | hk-   | hk-   | hk-   | abd         | abc    | abc    | abc    |
| CH03c01                                                                | 6  | hk-         | hk-   | hk-   | hk-   | hk-   | hk-   | hk-   | hk-   | hk-   | hk-   | hk-   | hk-   | hk-   | hk-   | eef         | efg    | eef    | efg    |
| CH03d07                                                                | 6  | abc         | abd   | abc   | abd   | abc   | abd   | abc   | abc   | abd   | abc   | abd   | abc   | abd   | abd   | abc         | abd    | abd    | abd    |
| CH03d12                                                                | 6  | abd         | abd   | abd   | abc   | abc   | abc   | abd   | abd   | abc   | abd   | abc   | abc   | abd   | abd   | abc         | abd    | abc    | abc    |
| Hi01d05                                                                | 6  | efg         | efg   | efg   | eef   | eef   | eef   | efg   | efg   | eef   | efg   | eef   | eef   | efg   | efg   | efg         | eef    | eef    | eef    |
| CH04e05                                                                | 7  | lm1m2       | lm1m2 | lm1m2 | lm1m2 | lm1m2 | lm1m2 | lm1m2 | lm1m2 | lm1m2 | lm1m2 | lm1m2 | lm1m2 | lm1m2 | lm1m2 | lm1m2       | lm1m2  | lm1m2  | lm1m2  |
| CH05b06z_2                                                             | 7  | eef         | efg   | eef   | eef   | efg   | eef   | efg   | eef   | efg   | eef   | efg   | eef   | eef   | efg   | eef         | nnp    | nnn    | nnp    |
| Hi04c10x_2                                                             | 7  | abd         | abc   | abd   | abd   | abc   | abd   | abd   | abc   | abc   | abd   | abc   | abd   | abd   | abc   | abd         | abd    | abc    | abc    |
| Hi05b09                                                                | 7  | llm         | llm   | llm   | llm   | llm   | llm   | llm   | llm   | llm   | llm   | llm   | llm   | llm   | llm   | llm         | llm    | llm    | llm    |
| CH01c06                                                                | 8  | abd         | abd   | abc   | abc   | abc   | abc   | abc   | abc   | abc   | abd   | abc   | abd   | abc   | abc   | abd         | abc    | abc    | abc    |
| CH02g09                                                                | 8  | lm1m2       | lm1m2 | lm1m2 | lm1m2 | lm1m2 | lm1m2 | lm1m2 | lm1m2 | lm1m2 | lm1m2 | lm1m2 | lm1m2 | lm1m2 | lm1m2 | lm1m2       | lm1m2  | lm1m2  | lm1m2  |
| Hi04b12                                                                | 8  | abc         | abd   | abd   | abd   | abd   | abd   | abd   | abd   | abd   | abd   | abc   | abd   | abc   | abd   | abd         | abd    | abc    | abc    |
| Hi04e05                                                                | 8  | llm         | llm   | llm   | llm   | llm   | llm   | llm   | llm   | llm   | llm   | llm   | llm   | llm   | llm   | llm         | llm    | llm    | llm    |
| Hi23g12                                                                | 8  | nnp         | nnn   | nnp   | nnp   | nnp   | nnn   | nnn   | nnn   | nnp   | nnn   | nnp   | nnp   | nnp   | nnp   | nnp         | nnp    | nnp    | nnp    |
| CH01h02_1                                                              | 9  | hhk         | hhk   | hhk   | hhk   | hhk   | hkk   | hhk   | hhk   | hkk   | hhk   | hhk   | hkk   | hhk   | hkk   | abd         | abc    | abc    | abc    |
| CH01h02_2                                                              | 9  | abd         | abd   | abd   | abc   | abc   | abc   | abd   | abc   | abc   | abd   | abd   | abc   | abd   | abd   | abc         | abd    | abd    | abd    |
| CH05c07                                                                | 9  | abd         | abc   | abc   | abd   | abc   | abd   | abd   | abc   | abd   | abd   | abd   | abd   | abd   | abd   | abc         | abd    | abd    | abd    |
| CH05d08y_2                                                             | 9  | nnp         | nnp   | nnn   | nnp   | nnp   | nnp   | nnn   | nnn   | nnn   | nnp   | nnn   | nnn   | nnp   | nnn   | nnp         | nnn    | nnp    | nnp    |
| GD142                                                                  | 9  | abc         | abc   | abc   | abc   | abc   | abc   | abc   | abd   | abd   | abc   | abc   | abc   | abc   | abc   | abd         | abc    | abc    | abd    |
| Hi01d01                                                                | 9  | lm1m2       | lm1m2 | lm1m2 | lm1m2 | lm1m2 | lm1m2 | lm1m2 | lm1m2 | lm1m2 | lm1m2 | lm1m2 | lm1m2 | lm1m2 | lm1m2 | lm1m2       | lm1m2  | lm1m2  | lm1m2  |
| Hi05e07                                                                | 9  | abc         | abc   | abc   | abc   | abd   | abd   | abc   | abd   | abd   | abc   | abc   | abd   | abd   | abc   | abd         | abd    | abc    | abc    |
| NH029a                                                                 | 9  | abd         | abd   | abd   | abd   | abd   | abc   | abd   | abd   | abc   | abd   | abd   | abc   | abc   | abd   | abc         | abd    | abd    | abd    |
| CH01f07a                                                               | 10 | abc         | abd   | abd   | abc   | abc   | abd   | abd   | abd   | abd   | abd   | abc   | abd   | abc   | abd   | abc         | abd    | abd    | abc    |
| CH01f12                                                                | 10 | abd         | abc   | abc   | abc   | abd   | abd   | abd   | abc   | abd   | abd   | abc   | abd   | abc   | abd   | abd         | abc    | abc    | abc    |
| CH02a10                                                                | 10 | lm1m2       | lm1m2 | lm1m2 | lm1m2 | lm1m2 | lm1m2 | lm1m2 | lm1m2 | lm1m2 | lm1m2 | lm1m2 | lm1m2 | lm1m2 | lm1m2 | lm1m2       | lm1m2  | lm1m2  | lm1m2  |
| CH02b03b                                                               | 10 | abc         | abc   | abd   | abd   | abd   | abc   | abc   | abd   | abc   | abc   | abd   | abc   | abc   | abc   | abd         | abd    | abd    | abc    |
| CH02b07                                                                | 10 | abc         | abc   | abd   | abd   | abc   | abd   | abc   | abd   | abc   | abc   | abc   | abd   | abc   | abd   | abd         | abd    | abc    | abc    |

| Triploid seedlings from the crosses of 'Gala × Fuji' and 'M 26 × Fu 2' |    |             |       |       |       |       |       |       |       |       |       |       |       |       |       |             |        |        |        |        |
|------------------------------------------------------------------------|----|-------------|-------|-------|-------|-------|-------|-------|-------|-------|-------|-------|-------|-------|-------|-------------|--------|--------|--------|--------|
| Markers                                                                | LG | Gala × Fuji |       |       |       |       |       |       |       |       |       |       |       |       |       | M 26 × Fu 2 |        |        |        |        |
|                                                                        |    | GF41        | GF42  | GF43  | GF44  | GF45  | GF46  | GF47  | GF48  | GF49  | GF50  | GF51  | GF52  | GF53  | GF54  | GF55        | M26F24 | M26F25 | M26F26 | M26F27 |
| CH02c11                                                                | 10 | abd         | abd   | abd   | abc   | abc   | abd   | abd   | abc   | abd   | abd   | abc   | abd   | abc   | abd   | abc         | nnp    | nnp    | nnn    | nnn    |
| CH03d11                                                                | 10 | lm1m2       | lm1m2 | lm1m2 | lm1m2 | lm1m2 | lm1m2 | lm1m2 | lm1m2 | lm1m2 | lm1m2 | lm1m2 | lm1m2 | lm1m2 | lm1m2 | lm1m2       | abd    | abc    | abd    | abd    |
| CH04c06y_1                                                             | 10 | lm1m2       | lm1m2 | lm1m2 | lm1m2 | lm1m2 | lm1m2 | lm1m2 | lm1m2 | lm1m2 | lm1m2 | lm1m2 | lm1m2 | lm1m2 | lm1m2 | lm1m2       | llm    | llm    | llm    | llm    |
| Hi02d04                                                                | 10 | llm         | llm   | llm   | llm   | llm   | llm   | llm   | llm   | llm   | llm   | llm   | llm   | llm   | llm   | llm         | abc    | abd    | abd    | abd    |
| Hi04f08                                                                | 10 | nnn         | nnp   | nnp   | nnp   | nnn   | nnn   | nnn   | nnp   | nnn   | nnn   | nnp   | nnn   | nnp   | nnn   | nnn         | abd    | abc    | abc    | abc    |
| MS02a01                                                                | 10 | nnn         | nnn   | nnn   | nnp   | nnp   | nnn   | nnn   | nnp   | nnn   | nnn   | nnp   | nnn   | nnp   | nnn   | nnp         | nnp    | nnp    | nnn    | nnn    |
| MS06g03                                                                | 10 | abd         | abc   | abc   | abd   | abd   | abd   | abc   | abd   | abc   | abc   | abd   | abc   | abd   | abc   | abd         | abd    | abd    | abc    | abc    |
| CH02d08                                                                | 11 | abd         | abd   | abd   | abd   | abd   | abc   | abd   | abc   | abc   | abd   | abd   | abc   | abd   | abc   | abd         | abd    | abd    | abc    | abd    |
| CH04g07                                                                | 11 | abd         | abd   | abd   | abd   | abd   | abc   | abd   | abc   | abc   | abd   | abd   | abc   | abd   | abc   | abd         | abd    | abd    | abd    | abd    |
| CH04h02_1                                                              | 11 | abc         | abc   | abc   | abc   | abd   | abd   | abd   | abd   | abd   | abc   | abd   | abd   | abc   | abd   | abc         | nnp    | nnp    | nnn    | nnp    |
| CH04h02_3                                                              | 11 | nnn         | nnn   | nnn   | nnn   | nnp   | nnp   | nnp   | nnn   | nnp   | nnn   | nnp   | nnp   | nnn   | nnp   | nnn         | nnn    | nnn    | nnp    | nnn    |
| Hi06b06                                                                | 11 | abd         | abc   | abc   | abc   | abc   | abd   | abc   | abd   | abd   | abc   | abc   | abd   | abc   | abd   | abc         | abc    | abc    | abc    | abc    |
| CH01b12y                                                               | 12 | abd         | abd   | abc   | abd   | abd   | abd   | abc   | abc   | abc   | abd   | abd   | abc   | abd   | abc   | abd         | abc    | abd    | abc    | abd    |
| CH01f02                                                                | 12 | eef         | efg   | eef   | efg   | efg   | efg   | eef   | efg   | eef   | efg   | efg   | efg   | efg   | eef   | efg         | hk-    | hk-    | hk-    | hk-    |
| CH01g12                                                                | 12 | abc         | abc   | abc   | abc   | abc   | abc   | abd   | abd   | abd   | abc   | abc   | abd   | abc   | abd   | abd         | abd    | abc    | abd    | abc    |
| CH03h03z_2                                                             | 12 | nnp         | nnn   | nnn   | nnn   | nnn   | nnn   | nnp   | nnn   | nnp   | nnn   | nnn   | nnp   | nnn   | nnp   | nnp         | nnp    | nnp    | nnn    | nnp    |
| CH05d04                                                                | 12 | efg         | eef   | eef   | eef   | eef   | efg   | efg   | eef   | efg   | eef   | eef   | efg   | eef   | eef   | efg         | abc    | abd    | abc    | abd    |
| CH05d11                                                                | 12 | efg         | eef   | eef   | eef   | eef   | eef   | efg   | eef   | efg   | eef   | eef   | eef   | eef   | eef   | efg         | abc    | abd    | abc    | abd    |
| NZ28f04                                                                | 12 | abc         | abd   | abd   | abd   | abd   | abd   | abc   | abd   | abc   | abd   | abd   | abc   | abd   | abc   | abc         | abd    | abc    | abd    | abc    |
| AU223486                                                               | 13 | hk-         | hk-   | hk-   | hk-   | hk-   | hk-   | hk-   | hk-   | hk-   | hk-   | hk-   | hk-   | hk-   | hk-   | hk-         | hhk    | hhk    | hkk    | hkk    |
| CH03a08                                                                | 13 | abc         | abd   | abd   | abd   | abc   | abc   | abc   | abd   | abc   | abc   | abd   | abd   | abc   | abd   | abc         | abd    | abd    | abc    | abc    |
| CH03h03z_1                                                             | 13 | abc         | abd   | abd   | abd   | abc   | abc   | abc   | abd   | abc   | abc   | abd   | abd   | abc   | abd   | abc         | hhk    | hhk    | hkk    | hkk    |
| CH05c06_1                                                              | 13 | abd         | abd   | abd   | abd   | abd   | abd   | abc   | abd   | abc   | abd   | abc   | abd   | abc   | abc   | abd         | abd    | abd    | abd    | abd    |
| CH05f04                                                                | 13 | abc         | abd   | abc   | abc   | abc   | abc   | abd   | abd   | abd   | abc   | abd   | abc   | abc   | abd   | abc         | abc    | abc    | abc    | abc    |
| CH05h05                                                                | 13 | abd         | abc   | abd   | abd   | abd   | abd   | abc   | abc   | abc   | abc   | abd   | abd   | abd   | abc   | abd         | abd    | abd    | abd    | abd    |
| GD147                                                                  | 13 | hkk         | hkk   | hhk   | hkk   | hhk   | hkk   | hhk   | hkk   | hhk   | hhk   | hkk   | hkk   | hhk   | hhk   | hhk         | abc    | abd    | abc    | abc    |
| Hi03e04                                                                | 13 | abc         | abc   | abd   | abd   | abd   | abc   | abc   | abc   | abd   | abc   | abc   | abc   | abc   | abc   | abd         | abd    | abc    | abc    | abc    |
| Hi05c06_2                                                              | 13 | hkk         | hkk   | hhk   | hkk   | hhk   | hkk   | hkk   | hkk   | hhk   | hhk   | hkk   | hkk   | hkk   | hhk   | hkk         | hkk    | hhk    | hkk    | hhk    |
| Hi07b02_3                                                              | 13 | llm         | llm   | llm   | llm   | llm   | llm   | llm   | llm   | llm   | llm   | llm   | llm   | llm   | llm   | llm         | lll    | llm    | llm    | lll    |
| Hi20b03                                                                | 13 | abc         | abd   | abd   | --    | abc   | abc   | abc   | --    | abd   | abc   | abd   | abc   | abc   | abd   | abc         | abc    | abd    | abc    | abc    |
| NH009b                                                                 | 13 | abd         | abc   | abc   | abc   | abd   | abd   | abd   | abc   | abd   | abd   | abc   | abd   | abd   | abc   | abd         | abd    | abc    | abd    | abd    |
| NZ03c01x_2                                                             | 13 | llm         | llm   | llm   | llm   | llm   | llm   | llm   | llm   | llm   | llm   | llm   | llm   | llm   | llm   | llm         | nnn    | nnn    | nnp    | nnp    |

| Triploid seedlings from the crosses of 'Gala × Fuji' and 'M 26 × Fu 2' |    |             |       |       |       |       |       |       |       |       |       |       |       |       |       |             |        |        |        |        |
|------------------------------------------------------------------------|----|-------------|-------|-------|-------|-------|-------|-------|-------|-------|-------|-------|-------|-------|-------|-------------|--------|--------|--------|--------|
| Markers                                                                | LG | Gala × Fuji |       |       |       |       |       |       |       |       |       |       |       |       |       | M 26 × Fu 2 |        |        |        |        |
|                                                                        |    | GF41        | GF42  | GF43  | GF44  | GF45  | GF46  | GF47  | GF48  | GF49  | GF50  | GF51  | GF52  | GF53  | GF54  | GF55        | M26F24 | M26F25 | M26F26 | M26F27 |
| CH01g05                                                                | 14 | abc         | abd   | abc   | abd   | abd   | abd   | abc   | abd   | abc   | abd   | abc   | abc   | abd   | abd   | abd         | hkk    | hhk    | hkk    | hhk    |
| CH03a02                                                                | 14 | abd         | abd   | abc   | abc   | abc   | abc   | abd   | abc   | abd   | abc   | abd   | abc   | abc   | abd   | abc         | abc    | abd    | abc    | abd    |
| CH03d08                                                                | 14 | abd         | abc   | abc   | abc   | abc   | abc   | abd   | abc   | abd   | abd   | abd   | abc   | abc   | abc   | abc         | abd    | abc    | abd    | abd    |
| CH05g07z_1                                                             | 14 | hhk         | hkk   | hkk   | hkk   | hkk   | hkk   | hhk   | hkk   | hhk   | hkk   | hkk   | hhk   | hkk   | hhk   | hhk         | hkk    | hhk    | hkk    | hhk    |
| CH05g07z_2                                                             | 14 | hhk         | hkk   | hkk   | hkk   | hkk   | hkk   | hhk   | hkk   | hhk   | hkk   | hkk   | hhk   | hkk   | hhk   | hhk         | hkk    | hhk    | hkk    | hhk    |
| CH02c02a_1                                                             | 15 | abc         | abc   | abc   | abc   | abd   | abc   | abd   | abc   | abd   | abc   | abc   | abc   | abc   | abd   | abd         | abd    | abc    | abd    | abc    |
| CH02c09                                                                | 15 | lm1m2       | lm1m2 | lm1m2 | lm1m2 | lm1m2 | lm1m2 | lm1m2 | lm1m2 | lm1m2 | lm1m2 | lm1m2 | lm1m2 | lm1m2 | lm1m2 | lm1m2       | abc    | abd    | abc    | abd    |
| CH02d11                                                                | 15 | abc         | abd   | abc   | abc   | abc   | abc   | abd   | abc   | abc   | abc   | abc   | abd   | abc   | abc   | abd         | abd    | abc    | abd    | abd    |
| CH03b10                                                                | 15 | abd         | abd   | abd   | abd   | abd   | abd   | abd   | abd   | abd   | abd   | abd   | abc   | abd   | abd   | abd         | abc    | abd    | abc    | abc    |
| Hi02g06                                                                | 15 | nnp         | nnp   | nnn   | nnn   | nnp   | nnn   | nnp   | nnp   | nnp   | nnn   | nnp   | nnp   | nnn   | nnp   | nnn         | abd    | abd    | abd    | abd    |
| Hi04c05                                                                | 15 | abd         | abd   | abd   | abd   | abd   | abd   | abc   | abc   | abd   | abd   | abc   | abd   | abd   | abd   | abd         | abc    | abc    | abc    | abc    |
| Hi06f09                                                                | 15 | abd         | abd   | abd   | abd   | abd   | abd   | abc   | abd   | abd   | abd   | abd   | abc   | abd   | abd   | abd         | abd    | abd    | abd    | abd    |
| NZ02b01                                                                | 15 | abd         | abc   | abd   | abd   | abd   | abd   | abc   | abc   | abd   | abd   | abd   | abd   | abd   | abd   | abd         | abd    | abd    | abd    | abd    |
| CH02d10a                                                               | 16 | abc         | abc   | abc   | abc   | abc   | abc   | abd   | abd   | abd   | abc   | abc   | abd   | abc   | abd   | abd         | abc    | abd    | abc    | abd    |
| CH04f10                                                                | 16 | abd         | abd   | abc   | abc   | abc   | abc   | abd   | abc   | abd   | abd   | abc   | abd   | abd   | abd   | abd         | llm    | lll    | llm    | llm    |
| CH05a04                                                                | 16 | abc         | abc   | abd   | abd   | abd   | abd   | abc   | abd   | abc   | abc   | abc   | abc   | abc   | abc   | abc         | efg    | eef    | eef    | eef    |
| CH05b06z_1                                                             | 16 | efg         | eef   | efg   | eef   | eef   | efg   | efg   | efg   | eef   | efg   | efg   | eef   | efg   | efg   | eef         | abc    | abc    | abc    | abc    |
| CH05c06_2                                                              | 16 | abc         | abc   | abd   | abd   | abd   | abc   | abc   | abc   | abd   | abc   | abc   | abc   | abc   | abc   | abd         | abd    | abc    | abc    | abc    |
| Hi01c11x                                                               | 16 | eef         | eef   | eef   | efg   | efg   | eef   | efg   | eef   | efg   | eef   | eef   | eef   | eef   | eef   | efg         | abd    | abd    | abd    | abd    |
| Hi01d06y                                                               | 16 | abd         | abd   | abc   | abc   | abc   | abc   | abd   | abc   | abd   | abd   | abc   | abd   | abd   | abd   | abd         | abd    | abd    | abd    | abd    |
| Hi04e04                                                                | 16 | abd         | abd   | abc   | abc   | abc   | abc   | abd   | abc   | abc   | abd   | abd   | abd   | abd   | abd   | abd         | efg    | eef    | eef    | eef    |
| CH01h01                                                                | 17 | abd         | abc   | abc   | abd   | abc   | abd   | abd   | abc   | abd   | abd   | abd   | abd   | abd   | abd   | abd         | abd    | abc    | abc    | abc    |
| CH04c06y_2                                                             | 17 | abc         | abd   | abc   | abd   | abd   | abd   | abd   | abc   | abd   | abc   | abd   | abd   | abc   | abd   | abc         | abd    | abc    | abc    | abc    |
| CH04c06y_3                                                             | 17 | lm1m2       | lm1m2 | lm1m2 | lm1m2 | lm1m2 | lm1m2 | lm1m2 | lm1m2 | lm1m2 | lm1m2 | lm1m2 | lm1m2 | lm1m2 | lm1m2 | lm1m2       | lm1m2  | lm1m2  | lm1m2  | lm1m2  |
| CH05d08y_1                                                             | 17 | abc         | abc   | abc   | abd   | abd   | abd   | abd   | abc   | abd   | abc   | abc   | abd   | abc   | abd   | abc         | abc    | abd    | abd    | abd    |
| CH05g03                                                                | 17 | abd         | abc   | abc   | abd   | abc   | abd   | abd   | abc   | abd   | abd   | abd   | abd   | abd   | abd   | abd         | abc    | abc    | abd    | abc    |
| GD96                                                                   | 17 | lm1m2       | lm1m2 | lm1m2 | lm1m2 | lm1m2 | lm1m2 | lm1m2 | lm1m2 | lm1m2 | lm1m2 | lm1m2 | lm1m2 | lm1m2 | lm1m2 | lm1m2       | llm    | lll    | llm    | lll    |
| Hi03c05                                                                | 17 | llm         | llm   | llm   | llm   | llm   | llm   | llm   | llm   | llm   | llm   | llm   | llm   | llm   | llm   | llm         | abd    | abc    | abc    | abc    |
| Hi05c06_1                                                              | 17 | llm         | llm   | llm   | llm   | llm   | llm   | llm   | llm   | llm   | llm   | llm   | llm   | llm   | llm   | llm         | hhk    | hhk    | hkk    | hhk    |
| Hi07b02_1                                                              | 17 | llm         | llm   | llm   | llm   | llm   | llm   | llm   | llm   | llm   | llm   | llm   | llm   | llm   | llm   | llm         | abd    | abc    | abc    | abc    |
| Hi07b02_2                                                              | 17 | nnn         | nnp   | nnn   | nnn   | nnp   | nnn   | nnn   | nnp   | nnp   | nnn   | nnn   | nnn   | nnp   | nnn   | nnn         | abc    | abd    | abd    | abd    |

Note: '-' represents a null allele, or missing data; 'p1' and 'p2', 'm1' and 'm2' are con-dominant alleles, respectively.
