# Supplementary material for: Molecular Genetic Features of Polyploidization and Aneuploidization Reveal Unique Patterns for Genome Duplication in Diploid Malus
Source: PubMed Central journal article supplement (PMC3254611; doi:10.1371/journal.pone.0029449), 2012-01-10
Supplement: pone.0029449.s010.pdf [file pone.0029449.s010.pdf]

Triploid seedlings from the crosses of 'Fuji × Gala' and 'M 27 × Fu 2'

| Markers    | LG | Fuji × Gala |       |       |       |       |       |       |       |       |       |       |       |       |       |       | M 27 × Fu 2 |        |        |        |
|------------|----|-------------|-------|-------|-------|-------|-------|-------|-------|-------|-------|-------|-------|-------|-------|-------|-------------|--------|--------|--------|
|            |    | FG38        | FG39  | FG40  | FG41  | FG42  | FG43  | FG44  | FG45  | FG46  | FG47  | FG48  | FG49  | FG50  | FG51  | FG52  | FG53        | M27F26 | M27F27 | M27F28 |
|            |    | CH05g08     | 1     | abd   | abc   | abd   | abd   | abc   | abd   | abd   | abd   | abc   | abd   | abc   | abd   | abd   | abc         | abc    | abc    | abd    |
| Hi02b10    | 1  | llm         | ---   | llm   | llm   | llm   | lll   | lll   | llm   | llm   | llm   | llm   | lll   | lll   | lll   | lll   | lll         | abd    | abd    | abc    |
| Hi02c07    | 1  | nnp         | nnn   | nnp   | nnp   | nnp   | nnn   | nnn   | nnp   | nnn   | nnp   | nnp   | nnn   | nnn   | nnn   | nnn   | nnn         | abd    | abd    | abc    |
| Hi07d08    | 1  | abc         | abd   | abd   | abc   | abd   | abc   | abc   | abc   | abd   | abd   | abc   | abd   | abd   | abc   | abd   | abd         | abc    | abc    | abd    |
| Hi12c02    | 1  | abd         | abc   | abd   | abd   | abc   | abc   | abc   | abd   | abd   | abc   | abd   | abc   | abc   | abd   | abc   | abd         | abd    | abd    | abc    |
| KA4B       | 1  | hkk         | hkk   | hkk   | hkk   | hkk   | hhk   | hhk   | hkk   | hkk   | hkk   | hhk   | hkk   | hhk   | hkk   | hhk   | hhk         | hkk    | hhk    | hhk    |
| CH02a04z   | 2  | abc         | abd   | abc   | abc   | abd   | abc   | abc   | abd   | abd   | abd   | abd   | abd   | abc   | abd   | abc   | abd         | abd    | abc    | abd    |
| CH02c02a_2 | 2  | nnn         | nnn   | nnn   | nnn   | nnn   | nnn   | nnp   | nnp   | nnp   | nnp   | nnp   | nnn   | nnn   | nnp   | nnn   | nnn         | llm    | lll    | llm    |
| CH02c02a_3 | 2  | abc         | abd   | abd   | abc   | abd   | abc   | abc   | abc   | abd   | abd   | abc   | abd   | abd   | abc   | abd   | abd         | abc    | abc    | abd    |
| CH02c06    | 2  | abc         | abc   | abd   | abc   | abd   | abd   | abc   | abc   | abd   | abc   | abd   | abd   | abc   | abc   | abd   | abc         | abd    | abc    | abd    |
| CH03d01    | 2  | abd         | abd   | abc   | abd   | abd   | abc   | abd   | abd   | abd   | abd   | abd   | abd   | abd   | abd   | abc   | abd         | abc    | abd    | abc    |
| CH03d10    | 2  | nnn         | nnp   | nnp   | nnp   | nnp   | nnp   | nnn   | nnn   | nnn   | nnp   | nnn   | nnp   | nnp   | nnn   | nnp   | nnp         | abc    | abd    | abc    |
| CH05e03    | 2  | abc         | abd   | abc   | abd   | abd   | abc   | abd   | abd   | abd   | abd   | abc   | abd   | abc   | abd   | abc   | abd         | abd    | abc    | abd    |
| CN493139   | 2  | abc         | abc   | abc   | abd   | abc   | abd   | abc   | abc   | abc   | abc   | abd   | abd   | abd   | abc   | abd   | abc         | abd    | abc    | abd    |
| Hi02a07    | 2  | abc         | abc   | abd   | abc   | abc   | abd   | abc   | abc   | abc   | abc   | abc   | abc   | abc   | abc   | abd   | abc         | abd    | abc    | abd    |
| Hi05c06_3  | 2  | llm         | llm   | lll   | llm   | llm   | lll   | llm   | llm   | llm   | llm   | llm   | llm   | llm   | llm   | lll   | llm         | nnp    | nnn    | nnp    |
| AU223657   | 3  | nnp         | nnp   | nnp   | nnn   | nnn   | nnp   | nnp   | nnp   | nnn   | nnn   | nnp   | nnn   | nnp   | nnp   | nnp   | nnn         | abc    | abc    | abd    |
| CH03e03    | 3  | abc         | abd   | abd   | abc   | abc   | abd   | abd   | abc   | abd   | abc   | abd   | abd   | abd   | abd   | abc   | abd         | abc    | abc    | abd    |
| CH03g07    | 3  | abc         | abc   | abc   | abc   | abd   | abc   | abc   | abd   | abc   | abd   | abc   | abd   | abc   | abd   | abd   | abd         | eef    | eef    | eef    |
| HGA8bY     | 3  | abc         | abc   | abd   | abc   | abc   | abd   | abd   | abc   | abd   | abd   | abc   | abc   | abc   | abc   | abc   | abd         | nnn    | nnp    | nnp    |
| Hi04c10x_1 | 3  | abd         | abd   | abd   | abc   | abc   | abd   | abc   | abc   | abd   | abd   | abd   | abc   | abd   | abc   | abc   | abc         | nnp    | nnn    | nnn    |
| Hi07e08x   | 3  | abc         | abd   | abd   | abc   | abc   | abd   | abd   | abc   | abd   | abc   | abd   | abd   | abd   | abd   | abc   | abd         | abd    | abd    | abc    |
| CH02c02b   | 4  | abc         | abc   | abd   | abc   | abc   | abd   | abc   | abc   | abc   | abc   | abc   | abc   | abc   | abc   | abd   | abc         | abd    | abc    | abd    |
| CH04e02    | 4  | eef         | eef   | efg   | eef   | eef   | efg   | eef   | eef   | efg   | efg   | efg   | efg   | eef   | eef   | efg   | eef         | efg    | eef    | eef    |
| CH05d02    | 4  | abc         | abc   | abd   | abc   | abd   | abd   | abc   | abd   | abc   | abd   | abd   | abd   | abc   | abc   | abd   | abc         | abc    | abd    | abd    |
| GD162      | 4  | abc         | abd   | abc   | abd   | abd   | abc   | abd   | abc   | abd   | abc   | abc   | abc   | abd   | abd   | abc   | abd         | abd    | abc    | abc    |
| Hi04c10x_3 | 4  | abd         | abd   | abc   | abd   | abc   | abc   | abd   | abc   | abd   | abc   | abc   | abc   | abd   | abd   | abc   | abd         | abd    | abc    | abd    |
| Hi07b02_4  | 4  | eef         | efg   | eef   | efg   | efg   | eef   | efg   | efg   | efg   | eef   | eef   | eef   | efg   | efg   | eef   | efg         | abd    | abc    | abd    |
| CH02a08z   | 5  | lm1m2       | lm1m2 | lm1m2 | lm1m2 | lm1m2 | lm1m2 | lm1m2 | lm1m2 | lm1m2 | lm1m2 | lm1m2 | lm1m2 | lm1m2 | lm1m2 | lm1m2 | lm1m2       | lm1m2  | lm1m2  | lm1m2  |
| CH03a04    | 5  | abc         | abc   | abc   | abc   | abd   | abd   | abc   | abc   | abc   | abc   | abc   | abc   | abc   | abc   | abd   | abc         | eef    | efg    | efg    |
| CH03a09    | 5  | efg         | efg   | efg   | efg   | eef   | eef   | efg   | efg   | eef   | efg   | efg   | efg   | efg   | efg   | eef   | efg         | efg    | eef    | efg    |
| CH04e03    | 5  | efg         | eef   | efg   | efg   | efg   | efg   | efg   | efg   | eef   | efg   | efg   | efg   | eef   | efg   | eef   | eef         | efg    | eef    | eef    |
| CH04g09y   | 5  | abd         | abc   | abd   | abd   | abc   | abd   | abd   | abd   | abc   | abc   | abd   | abc   | abd   | abd   | abc   | abc         | abc    | abd    | abd    |

| Triploid seedlings from the crosses of 'Fuji × Gala' and 'M 27 × Fu 2' |    |             |       |       |       |       |       |       |       |       |       |       |       |       |       |       |             |        |        |
|------------------------------------------------------------------------|----|-------------|-------|-------|-------|-------|-------|-------|-------|-------|-------|-------|-------|-------|-------|-------|-------------|--------|--------|
| Markers                                                                | LG | Fuji × Gala |       |       |       |       |       |       |       |       |       |       |       |       |       |       | M 27 × Fu 2 |        |        |
|                                                                        |    | FG38        | FG39  | FG40  | FG41  | FG42  | FG43  | FG44  | FG45  | FG46  | FG47  | FG48  | FG49  | FG50  | FG51  | FG52  | FG53        | M27F26 | M27F27 |
| CH04h02_2                                                              | 5  | abc         | abd   | abc   | abd   | abc   | abc   | abc   | abd   | abc   | abd   | abc   | abd   | abc   | abd   | abd   | hkk         | hhk    | hhk    |
| CH04h02_4                                                              | 5  | hkk         | hkk   | hkk   | hkk   | hkk   | hhk   | hhk   | hkk   | hhk   | hkk   | hkk   | hkk   | hkk   | hkk   | hkk   | hk-         | hk-    | hk-    |
| CH05e06                                                                | 5  | hk-         | hk-   | hk-   | hk-   | hk-   | hk-   | hk-   | hk-   | hk-   | hk-   | hk-   | hk-   | hk-   | hk-   | hk-   | hk-         | hk-    | hk-    |
| Hi04d02                                                                | 5  | abd         | abc   | abd   | abd   | abd   | abd   | abd   | abc   | abd   | abd   | abd   | abd   | abc   | abd   | abc   | hkk         | hhk    | hhk    |
| Hi11a03                                                                | 5  | hkk         | hkk   | hkk   | hkk   | hkk   | hhk   | hhk   | hkk   | hhk   | hkk   | hkk   | hkk   | hkk   | hkk   | hkk   | abd         | abc    | abc    |
| Hi21c08                                                                | 5  | hkk         | hkk   | hkk   | hkk   | hkk   | hhk   | hhk   | hkk   | hhk   | hkk   | hkk   | hkk   | hkk   | hkk   | hkk   | hkk         | hhk    | hhk    |
| AJ000761                                                               | 6  | hkk         | hkk   | hkk   | hkk   | hkk   | hhk   | hhk   | hkk   | hhk   | hkk   | hkk   | hkk   | hkk   | hkk   | hkk   | abc         | abd    | abd    |
| CH03c01                                                                | 6  | hk-         | hk-   | hk-   | hk-   | hk-   | hk-   | hk-   | hk-   | hk-   | hk-   | hk-   | hk-   | hk-   | hk-   | hk-   | abd         | abc    | abc    |
| CH03d07                                                                | 6  | hk-         | hk-   | hk-   | hk-   | hk-   | hk-   | hk-   | hk-   | hk-   | hk-   | hk-   | hk-   | hk-   | hk-   | hk-   | abc         | abd    | abd    |
| CH03d12                                                                | 6  | abc         | abc   | abc   | abc   | abc   | abd   | abc   | abd   | abc   | abd   | abc   | abd   | abc   | abd   | abd   | efg         | eef    | efg    |
| Hi01d05                                                                | 6  | abc         | abd   | abd   | abd   | abd   | abc   | abd   | abc   | abd   | abd   | abd   | abd   | abc   | abc   | abc   | eef         | efg    | eef    |
| CH04e05                                                                | 7  | eef         | efg   | efg   | efg   | efg   | eef   | efg   | eef   | eef   | efg   | efg   | efg   | eef   | eef   | eef   | lm          | ll     | lm     |
| CH05b06z_2                                                             | 7  | nnn         | nnn   | nnp   | nnn   | nnp   | nnn   | nnn   | nnp   | nnp   | nnn   | nnp   | nnp   | nnp   | nnp   | nnp   | nnp         | nnn    | nnn    |
| Hi04c10x_2                                                             | 7  | eef         | efg   | eef   | eef   | eef   | efg   | eef   | efg   | efg   | eef   | eef   | eef   | eef   | eef   | eef   | abc         | abc    | abc    |
| Hi05b09                                                                | 7  | abd         | abc   | abd   | abd   | abd   | abd   | abc   | abd   | abc   | abd   | abc   | abd   | abd   | abc   | abd   | abd         | abd    | abd    |
| CH01c06                                                                | 8  | nnp         | nnp   | nnn   | nnn   | nnn   | nnp   | nnp   | nnn   | nnn   | nnp   | nnn   | nnn   | nnn   | nnn   | nnp   | abc         | abc    | abc    |
| CH02g09                                                                | 8  | abd         | abd   | abd   | abd   | abc   | abc   | abc   | abc   | abd   | abc   | abc   | abc   | abc   | abc   | abc   | abd         | abd    | abd    |
| Hi04b12                                                                | 8  | nnn         | nnn   | nnp   | nnn   | nnp   | nnp   | nnn   | nnp   | nnp   | nnn   | nnp   | nnp   | nnp   | nnn   | nnn   | abc         | abc    | abc    |
| Hi04e05                                                                | 8  | abc         | abc   | abc   | abc   | abd   | abd   | abd   | abd   | abd   | abc   | abd   | abd   | abd   | abd   | abd   | lm          | ll     | lm     |
| Hi23g12                                                                | 8  | nnn         | nnn   | nnp   | nnn   | nnp   | nnn   | nnp   | nnn   | nnp   | nnn   | nnp   | nnn   | nnn   | nnp   | nnp   | abd         | abd    | abd    |
| CH01h02_1                                                              | 9  | llm         | lll   | llm   | lll   | llm   | llm   | llm   | lll   | lll   | lll   | llm   | lll   | lll   | llm   | llm   | efg         | efg    | efg    |
| CH01h02_2                                                              | 9  | hhk         | hkk   | hhk   | hhk   | hhk   | hhk   | hkk   | hkk   | hhk   | hhk   | hkk   | hhk   | hkk   | hhk   | hkk   | abc         | abd    | abd    |
| CH05c07                                                                | 9  | abd         | abd   | abd   | abd   | abd   | abc   | abc   | abc   | abc   | abd   | abd   | abc   | abd   | abd   | abc   | eef         | eef    | eef    |
| CH05d08y_2                                                             | 9  | abd         | abc   | abd   | abd   | abc   | abc   | abc   | abd   | abc   | abc   | abd   | abc   | abd   | abd   | abd   | abd         | abc    | abc    |
| GD142                                                                  | 9  | lm1m2       | lm1m2 | lm1m2 | lm1m2 | lm1m2 | lm1m2 | lm1m2 | lm1m2 | lm1m2 | lm1m2 | lm1m2 | lm1m2 | lm1m2 | lm1m2 | lm1m2 | efg         | efg    | efg    |
| Hi01d01                                                                | 9  | abd         | abd   | abc   | abc   | abc   | abd   | abd   | abd   | abd   | abc   | abc   | abd   | abd   | abd   | abc   | nnp         | nnp    | nnp    |
| Hi05e07                                                                | 9  | nnn         | nnn   | nnn   | nnp   | nnp   | nnn   | nnp   | nnp   | nnn   | nnn   | nnn   | nnp   | nnn   | nnp   | nnp   | abd         | abc    | abc    |
| NH029a                                                                 | 9  | abc         | abc   | abc   | abc   | abc   | abd   | abd   | abc   | abd   | abc   | abc   | abd   | abc   | abd   | abd   | abc         | abd    | abd    |
| CH01f07a                                                               | 10 | abd         | abd   | abd   | abd   | abd   | abc   | abc   | abc   | abc   | abd   | abd   | abc   | abd   | abd   | abc   | abc         | abc    | abd    |
| CH01f12                                                                | 10 | abc         | abd   | abc   | abd   | abc   | abd   | abc   | abd   | abc   | abd   | abc   | abd   | abc   | abd   | abd   | abc         | abc    | abc    |
| CH02a10                                                                | 10 | abc         | abd   | abc   | abd   | abd   | abd   | abc   | abc   | abc   | abd   | abd   | abc   | abd   | abd   | abd   | abd         | abd    | abc    |
| CH02b03b                                                               | 10 | nnn         | nnn   | nnn   | nnp   | nnn   | nnp   | nnn   | nnp   | nnn   | nnp   | nnn   | nnn   | nnn   | nnn   | nnp   | abc         | abc    | abd    |
| CH02b07                                                                | 10 | abd         | abd   | abc   | abd   | abc   | abd   | abc   | abd   | abc   | abd   | abc   | abd   | abc   | abd   | abd   | abc         | abc    | abc    |

| Triploid seedlings from the crosses of 'Fuji × Gala' and 'M 27 × Fu 2' |    |             |      |      |      |      |      |      |      |      |      |      |      |      |      |      |             |        |        |        |
|------------------------------------------------------------------------|----|-------------|------|------|------|------|------|------|------|------|------|------|------|------|------|------|-------------|--------|--------|--------|
| Markers                                                                | LG | Fuji × Gala |      |      |      |      |      |      |      |      |      |      |      |      |      |      | M 27 × Fu 2 |        |        |        |
|                                                                        |    | FG38        | FG39 | FG40 | FG41 | FG42 | FG43 | FG44 | FG45 | FG46 | FG47 | FG48 | FG49 | FG50 | FG51 | FG52 | FG53        | M27F26 | M27F27 | M27F28 |
| CH02c11                                                                | 10 | abc         | abc  | abd  | abc  | abd  | abc  | abd  | abc  | abd  | abc  | abd  | abc  | abd  | abc  | abc  | abc         | abd    | abd    | abc    |
| CH03d11                                                                | 10 | nnp         | nnp  | nnp  | nnp  | nnp  | nnn  | nnp  | nnn  | nnp  | nnn  | nnn  | nnp  | nnp  | nnn  | nnp  | nnn         | nnp    | nnp    | nnn    |
| CH04c06y_1                                                             | 10 | nnn         | nnn  | nnn  | nnn  | nnn  | nnp  | nnn  | nnn  | nnn  | nnp  | nnp  | nnn  | nnp  | nnp  | nnn  | nnp         | llm    | lll    | lll    |
| Hi02d04                                                                | 10 | nnn         | nnn  | nnp  | nnn  | nnn  | nnn  | nnp  | nnn  | nnp  | nnp  | nnp  | nnp  | nnn  | nnp  | nnn  | nnp         | abc    | abc    | abc    |
| Hi04f08                                                                | 10 | llm         | lll  | lll  | lll  | lll  | llm  | lll  | llm  | lll  | lll  | llm  | lll  | lll  | lll  | lll  | lll         | abd    | abd    | abd    |
| MS02a01                                                                | 10 | lll         | llm  | lll  | llm  | lll  | llm  | llm  | llm  | lll  | llm  | lll  | llm  | lll  | llm  | llm  | llm         | nnn    | nnn    | nnp    |
| MS06g03                                                                | 10 | abd         | abc  | abd  | abc  | abd  | abc  | abc  | abc  | abc  | abd  | abc  | abd  | abd  | abc  | abc  | abd         | abd    | abd    | abc    |
| CH02d08                                                                | 11 | abc         | abd  | abc  | abc  | abd  | abd  | abc  | abd  | abd  | abd  | abc  | abc  | abd  | abd  | abc  | abc         | abd    | abd    | abc    |
| CH04g07                                                                | 11 | abc         | abd  | abd  | abd  | abd  | abd  | abc  | abd  | abc  | abc  | abd  | abc  | abd  | abd  | abc  | abc         | abd    | abd    | abc    |
| CH04h02_1                                                              | 11 | abd         | abd  | abd  | abd  | abc  | abc  | abd  | abc  | abc  | abc  | abd  | abd  | abc  | abc  | abd  | abd         | nnp    | nnp    | nnn    |
| CH04h02_3                                                              | 11 | lll         | lll  | lll  | lll  | llm  | llm  | lll  | llm  | llm  | llm  | lll  | lll  | llm  | llm  | lll  | lll         | nnn    | nnn    | nnp    |
| Hi06b06                                                                | 11 | abd         | abc  | abc  | abc  | abc  | abc  | abd  | abc  | abd  | abd  | abc  | abd  | abc  | abc  | abd  | abd         | abc    | abc    | abd    |
| CH01b12y                                                               | 12 | abc         | abc  | abd  | abc  | abd  | abc  | abc  | abc  | abd  | abc  | abd  | abd  | abc  | abc  | abd  | abc         | abd    | abd    | abc    |
| CH01f02                                                                | 12 | eef         | eef  | efg  | eef  | efg  | eef  | eef  | eef  | efg  | eef  | efg  | efg  | eef  | eef  | efg  | efg         | efg    | eef    | eef    |
| CH01g12                                                                | 12 | abd         | abd  | abc  | abc  | abc  | abd  | abc  | abd  | abc  | abd  | abc  | abc  | abd  | abd  | abc  | abc         | abc    | abc    | abd    |
| CH03h03z_2                                                             | 12 | lll         | lll  | llm  | llm  | llm  | lll  | lll  | lll  | llm  | lll  | llm  | llm  | lll  | lll  | lll  | llm         | nnp    | nnp    | nnp    |
| CH05d04                                                                | 12 | efg         | efg  | eef  | eef  | efg  | efg  | efg  | efg  | eef  | efg  | eef  | eef  | eef  | efg  | efg  | eef         | nnn    | nnn    | nnn    |
| CH05d11                                                                | 12 | eef         | eef  | efg  | efg  | efg  | eef  | eef  | eef  | efg  | eef  | efg  | efg  | eef  | eef  | eef  | efg         | abc    | abc    | abc    |
| NZ28f04                                                                | 12 | abc         | abc  | abd  | abd  | abd  | abc  | abc  | abc  | abd  | abc  | abd  | abd  | abc  | abc  | abc  | abd         | abd    | abd    | abd    |
| AU223486                                                               | 13 | hhk         | hhk  | hhk  | hhk  | hkk  | hhk  | hkk  | hhk  | hkk  | hkk  | hhk  | hkk  | hhk  | hkk  | hkk  | hkk         | hhk    | hhk    | hhk    |
| CH03a08                                                                | 13 | abc         | abc  | abc  | abd  | abc  | abc  | abc  | abc  | abc  | abd  | abc  | abd  | abc  | abc  | abc  | abc         | abd    | abd    | abd    |
| CH03h03z_1                                                             | 13 | abd         | abc  | abc  | abd  | abc  | abc  | abc  | abc  | abc  | abd  | abc  | abd  | abc  | abc  | abc  | abc         | abd    | abd    | abd    |
| CH05c06_1                                                              | 13 | abd         | abd  | abc  | abd  | abc  | abd  | abc  | abd  | abd  | abc  | abd  | abc  | abc  | abd  | abc  | abd         | nnp    | nnn    | nnp    |
| CH05f04                                                                | 13 | abd         | abc  | abd  | abc  | abd  | abc  | abc  | abc  | abd  | abc  | abd  | abc  | abc  | abc  | abc  | abc         | abc    | abd    | abc    |
| CH05h05                                                                | 13 | abc         | abd  | abd  | abd  | abc  | abd  | abc  | abc  | abd  | abc  | abd  | abc  | abc  | abd  | abd  | abd         | abd    | abc    | abd    |
| GD147                                                                  | 13 | hkk         | hhk  | hhk  | hhk  | hkk  | hkk  | hkk  | hhk  | hkk  | hkk  | hkk  | hhk  | hkk  | hkk  | hkk  | hkk         | abd    | abd    | abd    |
| Hi03e04                                                                | 13 | abd         | abd  | abd  | abc  | abc  | abd  | abc  | abc  | abc  | abc  | abd  | abd  | abd  | abc  | abc  | abc         | abd    | abd    | abc    |
| Hi05c06_2                                                              | 13 | hkk         | hhk  | hhk  | hhk  | hkk  | hkk  | hkk  | hhk  | hkk  | hkk  | hkk  | hhk  | hkk  | hkk  | hkk  | hkk         | hhk    | hhk    | hkk    |
| Hi07b02_3                                                              | 13 | nnp         | nnp  | nnp  | nnp  | nnn  | nnn  | nnn  | nnp  | nnp  | nnn  | nnn  | nnn  | nnp  | nnn  | nnp  | nnn         | ll     | ll     | lm     |
| Hi20b03                                                                | 13 | abd         | abc  | abc  | abd  | abc  | abc  | abc  | abc  | abd  | abc  | abd  | abc  | abd  | abc  | abc  | abc         | abd    | abd    | abd    |
| NH009b                                                                 | 13 | abd         | abd  | abd  | abc  | abd  | abd  | abd  | abd  | abd  | abc  | abd  | abc  | abd  | abd  | abd  | abd         | abc    | abc    | abc    |
| NZ03c01x_2                                                             | 13 | nnp         | nnp  | nnn  | nnn  | nnp  | nnp  | nnn  | nnp  | nnn  | nnn  | nnp  | nnn  | nnp  | nnn  | nnp  | nnn         | nnp    | nnn    | nnp    |

|            |    | Triploid seedlings from the crosses of 'Fuji × Gala' and 'M 27 × Fu 2' |       |       |       |       |       |       |       |       |       |       |       |       |       |       |             |        |        |        |     |
|------------|----|------------------------------------------------------------------------|-------|-------|-------|-------|-------|-------|-------|-------|-------|-------|-------|-------|-------|-------|-------------|--------|--------|--------|-----|
| Markers    | LG | Fuji × Gala                                                            |       |       |       |       |       |       |       |       |       |       |       |       |       |       | M 27 × Fu 2 |        |        |        |     |
|            |    | FG38                                                                   | FG39  | FG40  | FG41  | FG42  | FG43  | FG44  | FG45  | FG46  | FG47  | FG48  | FG49  | FG50  | FG51  | FG52  | FG53        | M27F26 | M27F27 | M27F28 |     |
| CH01g05    | 14 | abc                                                                    | abd   | abd   | abd   | abd   | abd   | abc   | abc   | abd   | abc   | abc   | abc   | abd   | abc   | abd   | abd         | abc    | abc    | abd    |     |
| CH03a02    | 14 | abd                                                                    | abd   | abc   | abc   | abd   | abd   | abd   | abd   | abc   | abd   | abd   | abd   | abc   | abd   | abc   | abc         | abc    | abd    | abd    | abc |
| CH03d08    | 14 | abd                                                                    | abd   | abc   | abc   | abc   | abc   | abd   | abd   | abc   | abd   | abd   | abd   | abc   | abc   | abc   | abc         | abd    | abc    | abd    |     |
| CH05g07z_1 | 14 | hhk                                                                    | hhk   | hkk   | hkk   | hkk   | hhk   | hhk   | hhk   | hkk   | hhk   | hkk   | hkk   | hhk   | hhk   | hhk   | hkk         | hk-    | hk-    | hk-    |     |
| CH05g07z_2 | 14 | hhk                                                                    | hhk   | hkk   | hkk   | hkk   | hhk   | hhk   | hhk   | hkk   | hhk   | hkk   | hkk   | hhk   | hhk   | hhk   | hkk         | abd    | abc    | abd    |     |
| CH02c02a_1 | 15 | abd                                                                    | abc   | abd   | abc   | abd   | abc   | abd   | abc   | abd   | abc   | abd   | abd   | abc   | abc   | abc   | abc         | abc    | abc    | abd    |     |
| CH02c09    | 15 | nnn                                                                    | nnn   | nnp   | nnn   | nnp   | nnn   | nnn   | nnp   | nnn   | nnp   | nnn   | nnn   | nnp   | nnn   | nnp   | nnn         | abd    | abd    | abc    |     |
| CH02d11    | 15 | abc                                                                    | abc   | abd   | abc   | abd   | abc   | abd   | abc   | abd   | abc   | abc   | abd   | abc   | abd   | abc   | abc         | abd    | abd    | abc    |     |
| CH03b10    | 15 | abd                                                                    | abc   | abd   | abd   | abd   | abc   | abd   | abc   | abd   | abc   | abc   | abd   | abc   | abc   | abd   | abc         | nnp    | nnn    | nnn    |     |
| Hi02g06    | 15 | lm1m2                                                                  | lm1m2 | lm1m2 | lm1m2 | lm1m2 | lm1m2 | lm1m2 | lm1m2 | lm1m2 | lm1m2 | lm1m2 | lm1m2 | lm1m2 | lm1m2 | lm1m2 | lm1m2       | abd    | abc    | abd    |     |
| Hi04c05    | 15 | abd                                                                    | abd   | abc   | abd   | abc   | abc   | abc   | abd   | abc   | abd   | abd   | abc   | abd   | abc   | abd   | abd         | abd    | abd    | abc    |     |
| Hi06f09    | 15 | abc                                                                    | abd   | abc   | abd   | abc   | abd   | abc   | abd   | abc   | abd   | abd   | abc   | abd   | abd   | abd   | abd         | abc    | abd    | abc    |     |
| NZ02b01    | 15 | abc                                                                    | abd   | abc   | abc   | abc   | abd   | abc   | abd   | abc   | abd   | abd   | abc   | abd   | abd   | abd   | abd         | eef    | efg    | efg    |     |
| CH02d10a   | 16 | abd                                                                    | abd   | abc   | abc   | abc   | abd   | abd   | abd   | abc   | abd   | abc   | abc   | abd   | abd   | abc   | abc         | ll     | ll     | lm     |     |
| CH04f10    | 16 | abc                                                                    | abc   | abc   | abc   | abd   | abc   | abd   | abd   | abd   | abc   | abd   | abc   | abd   | abd   | abc   | abc         | efg    | eef    | eef    |     |
| CH05a04    | 16 | abd                                                                    | abd   | abd   | abc   | abc   | abd   | abc   | abc   | abc   | abd   | abc   | abd   | abd   | abc   | abd   | abd         | efg    | eef    | eef    |     |
| CH05b06z_1 | 16 | eef                                                                    | eef   | eef   | efg   | efg   | eef   | efg   | eef   | efg   | efg   | efg   | eef   | eef   | efg   | eef   | efg         | abd    | abd    | abc    |     |
| CH05c06_2  | 16 | abd                                                                    | abd   | abd   | abc   | abc   | abd   | abc   | abc   | abc   | abc   | abd   | abd   | abd   | abc   | abc   | abc         | abc    | abc    | abd    |     |
| Hi01c11x   | 16 | efg                                                                    | efg   | efg   | eef   | eef   | efg   | eef   | eef   | eef   | eef   | efg   | efg   | efg   | efg   | efg   | eef         | abc    | abc    | abd    |     |
| Hi01d06y   | 16 | abc                                                                    | abc   | abc   | abc   | abd   | abc   | abd   | abd   | abd   | abd   | abc   | abd   | abc   | abd   | abd   | abc         | abc    | abc    | abd    |     |
| Hi04e04    | 16 | abc                                                                    | abc   | abc   | abd   | abd   | abc   | abd   | abd   | abd   | abd   | abc   | abc   | abc   | abd   | abc   | abc         | abc    | abd    | abd    |     |
| CH01h01    | 17 | abd                                                                    | abc   | abd   | abd   | abc   | abc   | abc   | abd   | abc   | abc   | abd   | abc   | abd   | abd   | abd   | abd         | abc    | abd    | abd    |     |
| CH04c06y_2 | 17 | abd                                                                    | abc   | abc   | abd   | abd   | abd   | abc   | abd   | abd   | abd   | abc   | abd   | abc   | abd   | abc   | abd         | lm1m2  | lm1m2  | lm1m2  |     |
| CH04c06y_3 | 17 | nnp                                                                    | nnn   | nnn   | nnn   | nnp   | nnn   | nnn   | nnp   | nnp   | nnp   | nnp   | nnp   | nnn   | nnp   | nnp   | nnn         | abc    | abd    | abd    |     |
| CH05d08y_1 | 17 | abc                                                                    | abc   | abc   | abd   | abd   | abd   | abc   | abd   | abd   | abd   | abc   | abd   | abc   | abd   | abd   | abd         | abd    | abc    | abc    |     |
| CH05g03    | 17 | abd                                                                    | abc   | abd   | abd   | abc   | abc   | abd   | abc   | abc   | abc   | abd   | abc   | abd   | abd   | abd   | abd         | ll     | lm     | lm     |     |
| GD96       | 17 | nnn                                                                    | nnn   | nnp   | nnn   | nnn   | nnn   | nnp   | nnn   | nnp   | nnn   | nnp   | nnn   | nnp   | nnn   | nnp   | nnn         | abc    | abd    | abd    |     |
| Hi03c05    | 17 | nnp                                                                    | nnp   | nnn   | nnp   | nnp   | nnp   | nnn   | nnp   | nnn   | nnn   | nnn   | nnn   | nnp   | nnp   | nnp   | nnn         | nnp    | nnn    | nnp    |     |
| Hi05c06_1  | 17 | nnp                                                                    | nnp   | nnp   | nnp   | nnp   | nnn   | nnn   | nnn   | nnp   | nnn   | nnn   | nnn   | nnn   | nnn   | nnp   | nnn         | abc    | abd    | abd    |     |
| Hi07b02_1  | 17 | nnn                                                                    | nnn   | nnn   | nnn   | nnn   | nnn   | nnn   | nnp   | nnn   | nnp   | nnp   | nnp   | nnp   | nnp   | nnp   | nnn         | abd    | abc    | abc    |     |
| Hi07b02_2  | 17 | lll                                                                    | llm   | llm   | llm   | lll   | llm   | lll   | llm   | lll   | lll   | llm   | lll   | llm   | llm   | llm   | llm         | abc    | abc    | abd    |     |

Note: '-' represents a null allele, or missing data; 'p1' and 'p2', 'm1' and 'm2' are con-dominant alleles, respectively.
