# Supplementary material for: Molecular Genetic Features of Polyploidization and Aneuploidization Reveal Unique Patterns for Genome Duplication in Diploid Malus
Source: PubMed Central journal article supplement (PMC3254611; doi:10.1371/journal.pone.0029449), 2012-01-10
Supplement: pone.0029449.s011.pdf [file pone.0029449.s011.pdf]

| Markers    | LG | Triploid seedlings from three crosses |       |       |       |       |       |       |       |      |                  |       |       |       |       |       |       |       |       |             |       |
|------------|----|---------------------------------------|-------|-------|-------|-------|-------|-------|-------|------|------------------|-------|-------|-------|-------|-------|-------|-------|-------|-------------|-------|
|            |    | Fuji × Pink Lady                      |       |       |       |       |       |       |       |      | Pink Lady × Fuji |       |       |       |       |       |       |       |       | CO 2 × RO 6 |       |
|            |    | FP27                                  | FP28  | FP29  | FP30  | FP31  | FP32  | FP33  | FP34  | FP35 | PF25             | PF26  | PF27  | PF28  | PF29  | PF30  | PF31  | PF32  | PF33  | PF34        | CR28  |
| CH05g08    | 1  | abc                                   | abd   | abd   | abd   | abc   | abd   | abc   | abd   | abc  | abc              | abd   | abd   | abc   | abd   | abc   | abd   | abc   | abd   | lm1m2       | lm1m2 |
| Hi02b10    | 1  | llm                                   | llm   | lll   | lll   | llm   | lll   | lll   | lll   | nnn  | nnp              | nnp   | nnp   | nnn   | --    | nnp   | nnn   | nnn   | nnn   | lm1m2       | lm1m2 |
| Hi02c07    | 1  | nnn                                   | nnp   | nnn   | nnn   | nnp   | nnn   | nnn   | nnn   | lll  | llm              | llm   | llm   | lll   | lll   | llm   | lll   | lll   | lll   | llm         | llm   |
| Hi07d08    | 1  | abc                                   | abd   | abd   | abd   | abc   | abc   | abd   | abc   | abd  | abc              | abd   | abd   | abc   | abc   | abd   | abc   | abc   | abd   | abc         | abd   |
| Hi12c02    | 1  | abd                                   | abd   | abc   | abc   | abd   | abc   | abc   | abc   | abd  | abd              | abc   | abc   | abd   | abc   | abd   | abc   | abd   | abc   | abc         | abd   |
| KA4B       | 1  | hhk                                   | hkk   | hkk   | hkk   | hkk   | hhk   | hhk   | hhk   | hkk  | hkk              | hkk   | hhk   | hkk   | hkk   | hkk   | hhk   | hhk   | hhk   | hk-         | hk-   |
| CH02a04z   | 2  | abc                                   | abc   | abc   | abc   | abd   | abc   | abd   | abc   | abd  | abc              | abc   | abd   | abd   | abc   | abd   | abc   | abc   | abd   | hk-         | hk-   |
| CH02c02a_2 | 2  | nnn                                   | nnp   | nnp   | nnn   | nnp   | nnn   | nnp   | nnn   | nnp  | lll              | llm   | llm   | lll   | llm   | lll   | llm   | lll   | llm   | llllm       | llllm |
| CH02c02a_3 | 2  | abc                                   | abd   | abd   | abd   | abc   | abc   | abd   | abc   | abd  | abc              | abc   | abd   | abd   | abc   | abc   | abc   | abc   | abd   | nnn         | nnn   |
| CH02c06    | 2  | abd                                   | abc   | abd   | abc   | abd   | abd   | abc   | abd   | abc  | abd              | abd   | abc   | abd   | abc   | abc   | abd   | abc   | abd   | abd         | abd   |
| CH03d01    | 2  | abd                                   | abc   | abc   | abc   | abd   | abc   | abd   | abd   | abc  | abd              | abc   | abc   | abd   | abc   | abd   | abc   | abc   | abd   | abd         | abd   |
| CH03d10    | 2  | nnn                                   | nnp   | nnp   | nnp   | nnn   | nnp   | nnn   | nnn   | nnp  | llm              | lll   | lll   | llm   | lll   | lll   | llm   | lll   | lll   | llm         | nnn   |
| CH05e03    | 2  | abc                                   | abd   | abd   | abd   | abc   | abd   | abc   | abc   | abd  | abc              | abd   | abd   | abc   | abd   | abc   | abd   | abd   | abc   | abc         | abd   |
| CN493139   | 2  | abc                                   | abc   | abd   | abc   | abc   | abc   | abd   | abc   | abc  | abd              | abd   | abc   | abd   | abd   | abc   | abc   | abd   | abc   | abc         | abd   |
| Hi02a07    | 2  | hhk                                   | hhk   | hkk   | hhk   | hkk   | hhk   | hkk   | hkk   | hkk  | hkk              | hkk   | hhk   | hhk   | hkk   | hhk   | hhk   | hkk   | hhk   | eef         | eef   |
| Hi05c06_3  | 2  | llm                                   | lll   | lll   | lll   | llm   | lll   | llm   | llm   | lll  | nnn              | nnn   | nnp   | nnn   | nnp   | nnp   | nnn   | nnp   | nnp   | nnn         | nnn   |
| AU223657   | 3  | nnp                                   | nnp   | nnn   | nnn   | nnp   | nnn   | nnp   | nnp   | nnn  | lm1m2            | lm1m2 | lm1m2 | lm1m2 | lm1m2 | lm1m2 | lm1m2 | lm1m2 | lm1m2 | eef         | eef   |
| CH03e03    | 3  | abc                                   | abd   | abc   | abd   | abc   | abc   | abd   | abc   | abd  | abd              | abc   | abd   | abc   | abd   | abc   | abc   | abc   | abd   | abc         | abd   |
| CH03g07    | 3  | abd                                   | abd   | abd   | abd   | abc   | abc   | abd   | abc   | abd  | abd              | abd   | abc   | abc   | abc   | abc   | abc   | abc   | abd   | abd         | abc   |
| HGA8bY     | 3  | abd                                   | abd   | abd   | abc   | abc   | abc   | abd   | abc   | abc  | abd              | abd   | abd   | abc   | abc   | abd   | abc   | abd   | abc   | abc         | abd   |
| Hi04c10x_1 | 3  | abd                                   | abd   | abd   | abc   | abc   | abc   | abd   | abc   | abc  | abd              | abd   | abd   | abc   | abd   | abc   | abc   | abd   | abd   | abd         | abc   |
| Hi07e08x   | 3  | abc                                   | abc   | abd   | abc   | abd   | abd   | abc   | abd   | abd  | abc              | abd   | abc   | abd   | abc   | abd   | abc   | abd   | abc   | lm1m2       | lm1m2 |
| CH02c02b   | 4  | abc                                   | abd   | abd   | abd   | abc   | abd   | abc   | abd   | abc  | abd              | abd   | abd   | abc   | abd   | abd   | abc   | abd   | abd   | abc         | abc   |
| CH04e02    | 4  | efg                                   | eef   | eef   | eef   | efg   | efg   | efg   | eef   | efg  | eef              | efg   | eef   | efg   | eef   | efg   | efg   | eef   | efg   | efg         | eef   |
| CH05d02    | 4  | abd                                   | abc   | abc   | abc   | abd   | abd   | abc   | abd   | abc  | abc              | abd   | abc   | abc   | abc   | abc   | abd   | abc   | abd   | abd         | abd   |
| GD162      | 4  | abd                                   | abc   | abc   | abc   | abd   | abd   | abc   | abd   | abc  | abc              | abd   | abd   | abc   | abc   | abc   | abd   | abc   | abd   | abd         | abd   |
| Hi04c10x_3 | 4  | abd                                   | abc   | abc   | abc   | abd   | abd   | abc   | abd   | abc  | abc              | abd   | abd   | abc   | abc   | abc   | abd   | abc   | abd   | abd         | abd   |
| Hi07b02_4  | 4  | abd                                   | abc   | abc   | abc   | abd   | abd   | abc   | abd   | abc  | abc              | abd   | abd   | abc   | abd   | abc   | abd   | abc   | abd   | abd         | abd   |
| CH02a08z   | 5  | lm1m2                                 | lm1m2 | lm1m2 | lm1m2 | lm1m2 | lm1m2 | lm1m2 | lm1m2 | nnp  | nnn              | nnn   | nnn   | nnn   | nnn   | nnn   | nnp   | nnn   | nnn   | nnp         | nnp   |
| CH03a04    | 5  | abd                                   | abd   | abd   | abd   | abc   | abd   | abd   | abd   | abc  | abc              | abd   | abc   | abd   | abc   | abc   | abc   | abc   | abd   | eef         | eef   |
| CH03a09    | 5  | abd                                   | abc   | abc   | abc   | abd   | abc   | abc   | abd   | abd  | abc              | abc   | abd   | abd   | abd   | abd   | abd   | abd   | abc   | abd         | abc   |
| CH04e03    | 5  | abd                                   | abd   | abd   | abc   | abc   | abd   | abd   | abd   | abc  | abc              | abd   | abd   | abd   | abd   | abc   | abd   | abd   | abd   | efg         | efg   |
| CH04g09y   | 5  | eef                                   | efg   | efg   | efg   | eef   | efg   | efg   | efg   | eef  | eef              | eef   | efg   | efg   | efg   | efg   | efg   | efg   | eef   | eef         | efg   |



Triploid seedlings from three crosses

| Markers    | LG | Fuji × Pink Lady |      |      |      |      |      |      |      |       |                  |       |       |       |       |       |       |       |      |      | Pink Lady × Fuji |      |  |  | CO 2 × RO 6 |  |
|------------|----|------------------|------|------|------|------|------|------|------|-------|------------------|-------|-------|-------|-------|-------|-------|-------|------|------|------------------|------|--|--|-------------|--|
|            |    | Fuji × Pink Lady |      |      |      |      |      |      |      |       | Pink Lady × Fuji |       |       |       |       |       |       |       |      |      | CO 2 × RO 6      |      |  |  |             |  |
|            |    | FP27             | FP28 | FP29 | FP30 | FP31 | FP32 | FP33 | FP34 | FP35  | PF25             | PF26  | PF27  | PF28  | PF29  | PF30  | PF31  | PF32  | PF33 | PF34 | CR28             | CR29 |  |  |             |  |
| CH02c11    | 10 | abd              | abc  | abd  | abc  | abd  | abd  | abc  | abd  | abc   | abd              | abc   | abd   | abc   | abd   | abc   | abc   | abc   | abc  | nnn  | nnp              |      |  |  |             |  |
| CH03d11    | 10 | nnn              | nnp  | nnp  | nnp  | nnn  | nnn  | nnn  | nnp  | lm1m2 | lm1m2            | lm1m2 | lm1m2 | lm1m2 | lm1m2 | lm1m2 | lm1m2 | lm1m2 | nnn  | nnn  |                  |      |  |  |             |  |
| CH04c06y_1 | 10 | nnn              | nnp  | nnn  | nnn  | nnp  | nnn  | nnp  | nnn  | lll   | llm              | lll   | lll   | llm   | lll   | lll   | llm   | lll   | llm  | lll  |                  |      |  |  |             |  |
| Hi02d04    | 10 | nnn              | nnp  | nnp  | nnn  | nnp  | nnp  | nnp  | nnp  | lm1m2 | lm1m2            | lm1m2 | lm1m2 | lm1m2 | lm1m2 | lm1m2 | lm1m2 | lm1m2 | abd  | abd  |                  |      |  |  |             |  |
| Hi04f08    | 10 | llm              | lll  | lll  | lll  | llm  | llm  | lll  | lll  | nnn   | nnn              | nnp   | nnp   | nnp   | nnp   | nnp   | nnp   | nnp   | nnp  | nnp  |                  |      |  |  |             |  |
| MS02a01    | 10 | abc              | abd  | abd  | abd  | abc  | abc  | abd  | abd  | abd   | abc              | abc   | abd   | abd   | abc   | abd   | abd   | abc   | abd  | nnn  | nnn              |      |  |  |             |  |
| MS06g03    | 10 | abc              | abd  | abc  | abd  | abc  | abd  | abd  | abc  | abd   | abc              | abc   | abd   | abd   | abc   | abd   | abd   | abd   | abd  | abc  | abc              |      |  |  |             |  |
| CH02d08    | 11 | abc              | abc  | abd  | abc  | abc  | abd  | abc  | abc  | abd   | abd              | abc   | abc   | abc   | abd   | abc   | abd   | abd   | abd  | abc  | abc              |      |  |  |             |  |
| CH04g07    | 11 | abc              | abd  | abc  | abd  | abc  | abd  | abd  | abc  | abd   | abd              | abd   | abd   | abd   | abc   | abc   | abc   | abd   | abd  | abc  | abc              |      |  |  |             |  |
| CH04h02_1  | 11 | abd              | abd  | abc  | abd  | abd  | abc  | abd  | abc  | abd   | abd              | abd   | abd   | abc   | abc   | abd   | abc   | abc   | abd  | abd  | abd              |      |  |  |             |  |
| CH04h02_3  | 11 | lll              | lll  | llm  | lll  | lll  | llm  | lll  | llm  | lll   | nnn              | nnp   | nnp   | nnp   | nnp   | nnn   | nnp   | nnn   | nnn  | nnp  | nnp              |      |  |  |             |  |
| Hi06b06    | 11 | abd              | abc  | abd  | abc  | abd  | abc  | abd  | abd  | abd   | abc              | abc   | abc   | abc   | abd   | abc   | abd   | abc   | abc  | abd  | abd              |      |  |  |             |  |
| CH01b12y   | 12 | abc              | abd  | abc  | abd  | abd  | abc  | abc  | abd  | abc   | abd              | abc   | abd   | abd   | abc   | abc   | abd   | abd   | hk-  | hk-  |                  |      |  |  |             |  |
| CH01f02    | 12 | abc              | abc  | abc  | abd  | abc  | abd  | abd  | abd  | abd   | abc              | abc   | abd   | abc   | abd   | abd   | abc   | abc   | efg  | efg  |                  |      |  |  |             |  |
| CH01g12    | 12 | abc              | abc  | abc  | abd  | abc  | abc  | abd  | abd  | abc   | abc              | abc   | abd   | abc   | abd   | abc   | abd   | abc   | efg  | efg  |                  |      |  |  |             |  |
| CH03h03z_2 | 12 | lll              | llm  | llm  | lll  | llm  | llm  | lll  | lll  | llm   | nnp              | nnn   | nnp   | nnn   | nnp   | nnp   | nnp   | nnn   | nnp  | nnp  |                  |      |  |  |             |  |
| CH05d04    | 12 | efg              | eef  | efg  | eef  | efg  | efg  | eef  | eef  | efg   | eef              | eef   | efg   | efg   | eef   | eef   | eef   | efg   | efg  | abd  | abd              |      |  |  |             |  |
| CH05d11    | 12 | efg              | eef  | eef  | efg  | eef  | efg  | efg  | eef  | efg   | eef              | eef   | eef   | efg   | efg   | efg   | efg   | eef   | efg  | abd  | abd              |      |  |  |             |  |
| NZ28f04    | 12 | abd              | abd  | abd  | abc  | abd  | abd  | abc  | abc  | abd   | abc              | abd   | abc   | abd   | abc   | abc   | abc   | abd   | abd  | abc  | abc              |      |  |  |             |  |
| AU223486   | 13 | llm              | llm  | lll  | lll  | lll  | llm  | lll  | llm  | lll   | nnn              | nnn   | nnn   | nnp   | nnn   | nnp   | nnn   | nnp   | lll  | llm  |                  |      |  |  |             |  |
| CH03a08    | 13 | abd              | abc  | abd  | abc  | abd  | abc  | abc  | abd  | abd   | abc              | abc   | abd   | abd   | abc   | abd   | abd   | abc   | abd  | abc  | abd              |      |  |  |             |  |
| CH03h03z_1 | 13 | abd              | abc  | abd  | abc  | abd  | abc  | abc  | abd  | abc   | abd              | abc   | abd   | abd   | abc   | abd   | abd   | abc   | abd  | abc  | abd              |      |  |  |             |  |
| CH05c06_1  | 13 | lll              | llm  | lll  | lll  | llm  | llm  | lll  | llm  | lll   | nnn              | nnp   | nnp   | nnn   | nnn   | nnp   | nnn   | nnn   | hk-  | hk-  |                  |      |  |  |             |  |
| CH05f04    | 13 | abc              | abd  | abc  | abd  | abc  | abd  | abd  | abc  | abd   | abc              | abc   | abc   | abc   | abd   | abd   | abd   | abd   | hk-  | hk-  |                  |      |  |  |             |  |
| CH05h05    | 13 | abd              | abd  | abd  | abc  | abd  | abc  | abd  | abd  | abc   | abd              | abd   | abd   | abc   | abd   | abc   | abc   | abd   | abc  | abc  |                  |      |  |  |             |  |
| GD147      | 13 | hkk              | hkk  | hkk  | hkk  | hkk  | hkk  | hkk  | hkk  | hkk   | hkk              | hkk   | hkk   | hkk   | hkk   | hkk   | hkk   | hkk   | hk-  | hk-  |                  |      |  |  |             |  |
| Hi03e04    | 13 | hkk              | hkk  | hkk  | hkk  | hkk  | hkk  | hkk  | hkk  | hkk   | hkk              | hkk   | hkk   | hkk   | hkk   | hkk   | hkk   | hkk   | hk-  | hk-  |                  |      |  |  |             |  |
| Hi05c06_2  | 13 | abc              | abc  | abd  | abc  | abd  | abc  | abc  | abd  | abd   | abc              | abc   | abc   | abd   | abc   | abd   | abd   | abc   | abd  | abc  | abd              |      |  |  |             |  |
| Hi07b02_3  | 13 | nnn              | nnp  | nnp  | nnn  | nnp  | nnp  | nnn  | nnp  | llm   | llm              | llm   | lll   | llm   | lll   | lll   | llm   | lll   | llm  | lll  |                  |      |  |  |             |  |
| Hi20b03    | 13 | abd              | abc  | abd  | abc  | abd  | abd  | abc  | abd  | abd   | abc              | abd   | abd   | abc   | abd   | abd   | abd   | abc   | abd  | abd  | abd              |      |  |  |             |  |
| NH009b     | 13 | abc              | abd  | abc  | abd  | abc  | abd  | abd  | abc  | abd   | abd              | abc   | abc   | abd   | abc   | abd   | abc   | abd   | abd  | abd  | abd              |      |  |  |             |  |
| NZ03c01x_2 | 13 | nnn              | nnn  | nnp  | nnp  | nnp  | nnp  | nnn  | nnn  | nnp   | lll              | lll   | llm   | llm   | llm   | lll   | llm   | lll   | llm  | lll  | lll              |      |  |  |             |  |

| Markers    | LG | Triploid seedlings from three crosses |       |       |       |       |       |       |       |                  |       |       |       |       |       |       |       |           |       |       |       |       |
|------------|----|---------------------------------------|-------|-------|-------|-------|-------|-------|-------|------------------|-------|-------|-------|-------|-------|-------|-------|-----------|-------|-------|-------|-------|
|            |    | Fuji × Pink Lady                      |       |       |       |       |       |       |       | Pink Lady × Fuji |       |       |       |       |       |       |       | CO 2 × RO |       |       |       |       |
|            |    | FP27                                  | FP28  | FP29  | FP30  | FP31  | FP32  | FP33  | FP34  | FP35             | PF25  | PF26  | PF27  | PF28  | PF29  | PF30  | PF31  | PF32      | PF33  | PF34  | CR28  | CR29  |
| CH01g05    | 14 | abd                                   | abd   | abc   | abc   | abc   | abd   | abc   | abc   | abd              | abd   | abc   | abd   | abd   | abd   | abc   | abd   | abd       | abc   | abd   | abc   | abc   |
| CH03a02    | 14 | abc                                   | abc   | abc   | abd   | abc   | abc   | abd   | abd   | abc              | abd   | abd   | abc   | abc   | abc   | abd   | abc   | abc       | abc   | abd   | abc   | abc   |
| CH03d08    | 14 | abd                                   | abd   | abd   | abd   | abd   | abc   | abd   | abd   | abc              | abd   | abd   | abc   | abc   | abc   | abc   | abc   | abc       | abd   | abc   | abc   | abc   |
| CH05g07z_1 | 14 | hkk                                   | hkk   | hkk   | hhk   | hkk   | hkk   | hhk   | hhk   | hkk              | hhk   | hkk   | hhk   | hkk   | hkk   | hhk   | hhk   | hhk       | hkk   | hkk   | abc   | abc   |
| CH05g07z_2 | 14 | hkk                                   | hkk   | hkk   | hhk   | hkk   | hkk   | hhk   | hhk   | hkk              | hhk   | hkk   | hhk   | hkk   | hkk   | hhk   | hhk   | hhk       | hkk   | hkk   | hhk   | hhk   |
| CH02c02a_1 | 15 | abd                                   | abd   | abc   | abd   | abd   | abd   | abd   | abc   | abd              | abc   | abc   | abc   | abc   | abd   | abc   | abc   | abd       | abc   | abc   | abc   | abd   |
| CH02c09    | 15 | nnp                                   | nnp   | nnp   | nnn   | nnp   | nnn   | nnn   | nnp   | nnp              | lm1m2 | lm1m2 | lm1m2 | lm1m2 | lm1m2 | lm1m2 | lm1m2 | lm1m2     | lm1m2 | lm1m2 | lm1m2 | lm1m2 |
| CH02d11    | 15 | abd                                   | abc   | abc   | abd   | abc   | abd   | abd   | abc   | abd              | abc   | abd   | abd   | abc   | abd   | abc   | abc   | abd       | abc   | abc   | abd   | abc   |
| CH03b10    | 15 | abc                                   | abc   | abc   | abc   | abd   | abc   | abd   | abc   | abc              | abd   | abc   | abd   | abd   | abc   | abd   | abd   | abc       | abd   | abd   | abd   | abc   |
| Hi02g06    | 15 | lm1m2                                 | lm1m2 | lm1m2 | lm1m2 | lm1m2 | lm1m2 | lm1m2 | lm1m2 | lm1m2            | nnp   | nnp   | nnn   | nnn   | nnp   | nnp   | nnp   | nnp       | nnp   | nnp   | nnp   | nnp   |
| Hi04c05    | 15 | abc                                   | abc   | abc   | abd   | abd   | abc   | abc   | abd   | abc              | abd   | abc   | abd   | abd   | abc   | abd   | abd   | abc       | abc   | abd   | abd   | abc   |
| Hi06f09    | 15 | lm1m2                                 | lm1m2 | lm1m2 | lm1m2 | lm1m2 | lm1m2 | lm1m2 | lm1m2 | lm1m2            | nnn   | nnp   | nnp   | nnn   | nnp   | nnp   | nnn   | nnp       | nnn   | nnn   | abd   | abc   |
| NZ02b01    | 15 | abd                                   | abd   | abd   | abd   | abc   | abc   | abd   | abc   | abd              | abc   | abd   | abd   | abc   | abd   | abc   | abc   | abd       | abc   | abc   | lm1m2 | lm1m2 |
| CH02d10a   | 16 | abc                                   | abc   | abd   | abc   | abc   | abc   | abd   | abd   | abc              | abc   | abc   | abd   | abc   | abc   | abd   | abd   | abd       | abc   | abc   | efg   | efg   |
| CH04f10    | 16 | lll                                   | llm   | llm   | llm   | lll   | lll   | lll   | llm   | llm              | nnp   | nnn   | nnn   | nnn   | nnn   | nnn   | nnp   | nnn       | nnp   | nnp   | llm   | lll   |
| CH05a04    | 16 | abd                                   | abd   | abc   | abd   | abd   | abd   | abc   | abd   | abd              | abc   | abc   | abd   | abd   | abc   | abd   | abd   | abd       | abc   | abd   | abd   | abd   |
| CH05b06z_1 | 16 | abd                                   | abc   | abd   | abc   | abc   | abc   | abd   | abc   | abc              | abd   | abd   | abd   | abc   | abd   | abc   | abc   | abd       | abc   | abd   | efg   | efg   |
| CH05c06_2  | 16 | abd                                   | abd   | abc   | abc   | abd   | abd   | abc   | abd   | abd              | abc   | abc   | abd   | abd   | abc   | abd   | abd   | abd       | abd   | abd   | abd   | abd   |
| Hi01c11x   | 16 | efg                                   | efg   | eef   | eef   | efg   | efg   | eef   | efg   | efg              | eef   | eef   | efg   | efg   | efg   | efg   | efg   | efg       | efg   | efg   | efg   | efg   |
| Hi01d06y   | 16 | efg                                   | efg   | eef   | eef   | efg   | efg   | eef   | efg   | efg              | eef   | eef   | efg   | efg   | eef   | efg   | efg   | efg       | efg   | efg   | efg   | efg   |
| Hi04e04    | 16 | efg                                   | efg   | eef   | eef   | efg   | efg   | eef   | efg   | efg              | eef   | eef   | efg   | efg   | efg   | efg   | efg   | efg       | efg   | efg   | efg   | efg   |
| CH01h01    | 17 | abd                                   | abd   | abc   | abc   | abc   | abc   | abd   | abc   | abc              | abd   | abd   | abd   | abc   | abc   | abc   | abc   | abc       | abc   | abc   | abd   | abc   |
| CH04c06y_2 | 17 | llm                                   | lll   | lll   | llm   | lll   | lll   | lll   | lll   | lll              | nnp   | nnp   | nnp   | nnp   | nnp   | nnn   | nnp   | nnn       | nnn   | nnp   | lll   | lll   |
| CH04c06y_3 | 17 | nnn                                   | nnn   | nnn   | nnp   | nnn   | nnn   | nnn   | nnp   | nnn              | lll   | lll   | lll   | lll   | lll   | llm   | llm   | lll       | llm   | lll   | lll   | lll   |
| CH05d08y_1 | 17 | abc                                   | abd   | abd   | abd   | abc   | abc   | abc   | abd   | abd              | abd   | abd   | abd   | abc   | abc   | abd   | abd   | abd       | abc   | abd   | abc   | abd   |
| CH05g03    | 17 | lm1m2                                 | lm1m2 | lm1m2 | lm1m2 | lm1m2 | lm1m2 | lm1m2 | lm1m2 | lm1m2            | nnn   | nnp   | nnp   | nnn   | nnn   | nnp   | nnp   | nnn       | nnp   | nnn   | abd   | abc   |
| GD96       | 17 | nnp                                   | nnp   | nnn   | nnn   | nnn   | nnn   | nnp   | nnn   | nnn              | llm   | lll   | lll   | lll   | lll   | llm   | llm   | llm       | llm   | llm   | nnp   | nnn   |
| Hi03c05    | 17 | nnn                                   | nnn   | nnn   | nnp   | nnp   | nnn   | nnn   | nnp   | nnn              | lm1m2 | lm1m2 | lm1m2 | lm1m2 | lm1m2 | lm1m2 | lm1m2 | lm1m2     | lm1m2 | lm1m2 | nnn   | nnn   |
| Hi05c06_1  | 17 | nnn                                   | nnp   | nnp   | nnp   | nnn   | nnp   | nnn   | nnn   | nnp              | llm   | llm   | lll   | llm   | llm   | lll   | lll   | llm       | lll   | llm   | llm   | llm   |
| Hi07b02_1  | 17 | nnn                                   | nnn   | nnn   | nnn   | nnn   | nnp   | nnp   | nnp   | nnp              | lm1m2 | lm1m2 | lm1m2 | lm1m2 | lm1m2 | lm1m2 | lm1m2 | lm1m2     | lm1m2 | lm1m2 | abc   | abc   |
| Hi07b02_2  | 17 | lll                                   | llm   | lll   | llm   | lll   | llm   | llm   | lll   | lll              | nnn   | nnn   | nnp   | nnp   | nnn   | nnp   | nnp   | nnp       | nnp   | nnp   | nnn   | nnn   |

Note: '-' represents a null allele, or missing data; 'p1' and 'p2', 'm1' and 'm2' are con-dominant alleles, respectively.
