# Supplementary material for: Molecular Genetic Features of Polyploidization and Aneuploidization Reveal Unique Patterns for Genome Duplication in Diploid Malus
Source: PubMed Central journal article supplement (PMC3254611; doi:10.1371/journal.pone.0029449), 2012-01-10
Supplement: pone.0029449.s012.pdf [file pone.0029449.s012.pdf]

| Tetraploid seedlings from six crosses |    |             |        |        |        |             |        |        |                  |        |                  |        |           |           |
|---------------------------------------|----|-------------|--------|--------|--------|-------------|--------|--------|------------------|--------|------------------|--------|-----------|-----------|
| Markers                               | LG | Gala × Fuji |        |        |        | Fuji × Gala |        |        | Fuji × Pink Lady |        | Pink Lady × Fuji |        | M 26 × Fu | M 27 × Fu |
|                                       |    | GF56        | GF57   | GF58   | GF59   | FG54        | FG55   | FG56   | FP36             | FP37   | PF35             | PF36   | M26F28    | M27F29    |
| CH05g08                               | 1  | abcd        | abcd   | abcd   | abcd   | abcd        | abcd   | abcd   | abcd             | abcd   | abcd             | abcd   | abcd      |           |
| Hi02b10                               | 1  | nnnp        | nnnp   | nnnp   | nnnp   | lllm        | lllm   | lllm   | lllm             | lllm   | nnnp             | nnnp   | abcd      |           |
| Hi02c07                               | 1  | lm1lm2      | lm1lm2 | lm1lm2 | lm1lm2 | np1np2      | np1np2 | np1np2 | nnnp             | nnnp   | lllm             | lllm   | hkhk      |           |
| Hi07d08                               | 1  | abcd        | abcd   | abcd   | abcd   | abcd        | abcd   | abcd   | abcd             | abcd   | abcd             | abcd   | abcd      |           |
| Hi12c02                               | 1  | abcd        | abcd   | abcd   | abcd   | abcd        | abcd   | abcd   | abcd             | abcd   | abcd             | abcd   | abcd      |           |
| KA4B                                  | 1  | hkhk        | hkhk   | hkhk   | hkhk   | hkhk        | hkhk   | hkhk   | hkhk             | hkhk   | hkhk             | abcd   | hkhk      |           |
| CH02a04z                              | 2  | abcd        | abcd   | abcd   | abcd   | abcd        | abcd   | abcd   | abcd             | abcd   | abcd             | abcd   | abcd      |           |
| CH02c02a_2                            | 2  | lm1lm2      | lm1lm2 | lm1lm2 | lm1lm2 | np1np2      | np1np2 | np1np2 | nnnp             | nnnp   | lllm             | lllm   | lllm      |           |
| CH02c02a_3                            | 2  | abcd        | abcd   | abcd   | abcd   | abcd        | abcd   | abcd   | abcd             | abcd   | abcd             | np1np2 | abcd      |           |
| CH02c06                               | 2  | abcd        | abcd   | abcd   | abcd   | abcd        | abcd   | abcd   | abcd             | abcd   | abcd             | abcd   | abcd      |           |
| CH03d01                               | 2  | abcd        | abcd   | abcd   | abcd   | abcd        | abcd   | abcd   | abcd             | abcd   | abcd             | abcd   | abcd      |           |
| CH03d10                               | 2  | lm1lm2      | lm1lm2 | lm1lm2 | lm1lm2 | np1np2      | np1np2 | np1np2 | nnnp             | nnnp   | lllm             | lllm   | hkhk      |           |
| CH05e03                               | 2  | abcd        | abcd   | abcd   | abcd   | abcd        | abcd   | abcd   | abcd             | abcd   | abcd             | abcd   | abcd      |           |
| CN493139                              | 2  | abcd        | abcd   | abcd   | abcd   | abcd        | abcd   | abcd   | abcd             | abcd   | abcd             | abcd   | abcd      |           |
| Hi02a07                               | 2  | abcd        | abcd   | abcd   | abcd   | abcd        | abcd   | abcd   | hkhk             | hkhk   | hkhk             | hkhk   | abcd      |           |
| Hi05c06_3                             | 2  | nnnp        | nnnp   | nnnp   | nnnp   | lllm        | lllm   | lllm   | lllm             | lllm   | nnnp             | nnnp   | nnnp      |           |
| AU223657                              | 3  | lm1lm2      | lm1lm2 | lm1lm2 | lm1lm2 | np1np2      | np1np2 | np1np2 | np1np2           | np1np2 | llm1m2           | llm1m2 | abcd      |           |
| CH03e03                               | 3  | abcd        | abcd   | abcd   | abcd   | abcd        | abcd   | abcd   | abcd             | abcd   | abcd             | abcd   | abcd      |           |
| CH03g07                               | 3  | abcd        | abcd   | abcd   | abcd   | abcd        | abcd   | abcd   | abcd             | abcd   | abcd             | abcd   | efeg      |           |
| HGA8bY                                | 3  | abcd        | abcd   | abcd   | abcd   | abcd        | abcd   | abcd   | abcd             | abcd   | abcd             | abcd   | np1np2    |           |
| Hi04c10x_1                            | 3  | abcd        | abcd   | abcd   | abcd   | abcd        | abcd   | abcd   | abcd             | abcd   | abcd             | abcd   | np1np2    |           |
| Hi07e08x                              | 3  | abcd        | abcd   | abcd   | abcd   | abcd        | abcd   | abcd   | abcd             | abcd   | abcd             | abcd   | abcd      |           |
| CH02c02b                              | 4  | abcd        | abcd   | abcd   | abcd   | abcd        | abcd   | abcd   | abcd             | abcd   | abcd             | abcd   | abcd      |           |
| CH04e02                               | 4  | efeg        | efeg   | efeg   | efeg   | efeg        | efeg   | efeg   | efeg             | efeg   | efeg             | abcd   | efeg      |           |
| CH05d02                               | 4  | abcd        | abcd   | abcd   | abcd   | abcd        | abcd   | abcd   | abcd             | abcd   | abcd             | abcd   | efeg      |           |
| GD162                                 | 4  | abcd        | abcd   | abcd   | abcd   | abcd        | abcd   | abcd   | abcd             | abcd   | abcd             | abcd   | abcd      |           |
| Hi04c10x_3                            | 4  | abcd        | abcd   | abcd   | abcd   | abcd        | abcd   | abcd   | abcd             | abcd   | abcd             | abcd   | abcd      |           |
| Hi07b02_4                             | 4  | efeg        | efeg   | efeg   | efeg   | efeg        | efeg   | efeg   | abcd             | abcd   | abcd             | abcd   | efeg      |           |
| CH02a08z                              | 5  | np1np2      | np1np2 | np1np2 | np1np2 | lm1lm2      | lm1lm2 | lm1lm2 | llm1m2           | llm1m2 | np1np2           | np1np2 | np1np2    |           |
| CH03a04                               | 5  | abcd        | abcd   | abcd   | abcd   | abcd        | abcd   | abcd   | abcd             | abcd   | abcd             | abcd   | abcd      |           |
| CH03a09                               | 5  | efeg        | efeg   | efeg   | efeg   | efeg        | efeg   | efeg   | abcd             | abcd   | abcd             | abcd   | abcd      |           |
| CH04e03                               | 5  | efeg        | efeg   | efeg   | efeg   | efeg        | efeg   | efeg   | abcd             | abcd   | abcd             | abcd   | efeg      |           |
| CH04g09y                              | 5  | abcd        | abcd   | abcd   | abcd   | abcd        | abcd   | abcd   | efeg             | efeg   | efeg             | efeg   | abcd      |           |



| Tetraploid seedlings from six crosses |    |             |        |        |        |             |        |        |                  |        |                  |        |           |           |
|---------------------------------------|----|-------------|--------|--------|--------|-------------|--------|--------|------------------|--------|------------------|--------|-----------|-----------|
| Markers                               | LG | Gala × Fuji |        |        |        | Fuji × Gala |        |        | Fuji × Pink Lady |        | Pink Lady × Fuji |        | M 26 × Fu | M 27 × Fu |
|                                       |    | GF56        | GF57   | GF58   | GF59   | FG54        | FG55   | FG56   | FP36             | FP37   | PF35             | PF36   | M26F28    | M27F29    |
| CH02c11                               | 10 | abcd        | abcd   | abcd   | abcd   | abcd        | abcd   | abcd   | abcd             | abcd   | abcd             | abcd   | np1np2    | abcd      |
| CH03d11                               | 10 | lm1lm2      | lm1lm2 | lm1lm2 | lm1lm2 | np1np2      | np1np2 | np1np2 | np1np2           | np1np2 | llm1m2           | llm1m2 | abcd      | nnnp      |
| CH04c06y_1                            | 10 | lm1lm2      | lm1lm2 | lm1lm2 | lm1lm2 | np1np2      | np1np2 | np1np2 | nnnp             | nnnp   | llm              | llm    | llm       | llm       |
| Hi02d04                               | 10 | llm         | llm    | llm    | llm    | nnnp        | nnnp   | nnnp   | np1np2           | np1np2 | llm1m2           | llm1m2 | abcd      | abcd      |
| Hi04f08                               | 10 | nnnp        | nnnp   | nnnp   | nnnp   | llm         | llm    | llm    | llm              | llm    | nnnp             | nnnp   | abcd      | abcd      |
| MS02a01                               | 10 | nnnp        | nnnp   | nnnp   | nnnp   | llm         | llm    | llm    | abcd             | abcd   | abcd             | abcd   | np1np2    | np1np2    |
| MS06g03                               | 10 | abcd        | abcd   | abcd   | abcd   | abcd        | abcd   | abcd   | abcd             | abcd   | abcd             | abcd   | abcd      | abcd      |
| CH02d08                               | 11 | abcd        | abcd   | abcd   | abcd   | abcd        | abcd   | abcd   | abcd             | abcd   | abcd             | abcd   | abcd      | abcd      |
| CH04g07                               | 11 | abcd        | abcd   | abcd   | abcd   | abcd        | abcd   | abcd   | abcd             | abcd   | abcd             | abcd   | abcd      | abcd      |
| CH04h02_1                             | 11 | abcd        | abcd   | abcd   | abcd   | abcd        | abcd   | abcd   | abcd             | abcd   | abcd             | abcd   | hkhk      | nnnp      |
| CH04h02_3                             | 11 | nnnp        | nnnp   | nnnp   | nnnp   | llm         | llm    | llm    | llm              | llm    | nnnp             | nnnp   | nnnp      | hkhk      |
| Hi06b06                               | 11 | abcd        | abcd   | abcd   | abcd   | abcd        | abcd   | abcd   | abcd             | abcd   | abcd             | abcd   | abcd      | abcd      |
| CH01b12y                              | 12 | abcd        | abcd   | abcd   | abcd   | abcd        | abcd   | abcd   | abcd             | abcd   | abcd             | abcd   | abcd      | abcd      |
| CH01f02                               | 12 | efeg        | efeg   | efeg   | efeg   | efeg        | efeg   | efeg   | abcd             | abcd   | abcd             | abcd   | hkhk      | efeg      |
| CH01g12                               | 12 | abcd        | abcd   | abcd   | abcd   | abcd        | abcd   | abcd   | abcd             | abcd   | abcd             | abcd   | abcd      | abcd      |
| CH03h03z_2                            | 12 | nnnp        | nnnp   | nnnp   | nnnp   | llm         | llm    | llm    | llm              | llm    | nnnp             | nnnp   | np1np2    | np1np2    |
| CH05d04                               | 12 | efeg        | efeg   | efeg   | efeg   | efeg        | efeg   | efeg   | efeg             | efeg   | efeg             | efeg   | abcd      | np1np2    |
| CH05d11                               | 12 | efeg        | efeg   | efeg   | efeg   | efeg        | efeg   | efeg   | efeg             | efeg   | efeg             | efeg   | abcd      | abcd      |
| NZ28f04                               | 12 | abcd        | abcd   | abcd   | abcd   | abcd        | abcd   | abcd   | abcd             | abcd   | abcd             | abcd   | abcd      | abcd      |
| AU223486                              | 13 | hkhk        | hkhk   | hkhk   | hkhk   | hkhk        | hkhk   | hkhk   | llm              | llm    | nnnp             | nnnp   | hkhk      | hkhk      |
| CH03a08                               | 13 | abcd        | abcd   | abcd   | abcd   | abcd        | abcd   | abcd   | abcd             | abcd   | abcd             | abcd   | abcd      | abcd      |
| CH03h03z_1                            | 13 | abcd        | abcd   | abcd   | abcd   | abcd        | abcd   | abcd   | abcd             | abcd   | abcd             | abcd   | hkhk      | abcd      |
| CH05c06_1                             | 13 | abcd        | abcd   | abcd   | abcd   | abcd        | abcd   | abcd   | llm              | llm    | nnnp             | nnnp   | abcd      | nnnp      |
| CH05f04                               | 13 | abcd        | abcd   | abcd   | abcd   | abcd        | abcd   | abcd   | abcd             | abcd   | abcd             | abcd   | abcd      | abcd      |
| CH05h05                               | 13 | abcd        | abcd   | abcd   | abcd   | abcd        | abcd   | abcd   | abcd             | abcd   | abcd             | abcd   | abcd      | abcd      |
| GD147                                 | 13 | hkhk        | hkhk   | hkhk   | hkhk   | hkhk        | hkhk   | hkhk   | hkhk             | hkhk   | hkhk             | hkhk   | abcd      | abcd      |
| Hi03e04                               | 13 | abcd        | abcd   | abcd   | abcd   | abcd        | abcd   | abcd   | hkhk             | hkhk   | hkhk             | hkhk   | abcd      | abcd      |
| Hi05c06_2                             | 13 | hkhk        | hkhk   | hkhk   | hkhk   | hkhk        | hkhk   | hkhk   | abcd             | abcd   | abcd             | abcd   | hkhk      | hkhk      |
| Hi07b02_3                             | 13 | llm         | llm    | llm    | llm    | nnnp        | nnnp   | nnnp   | nnnp             | nnnp   | llm              | llm    | llm       | llm       |
| Hi20b03                               | 13 | abcd        | abcd   | abcd   | abcd   | abcd        | abcd   | abcd   | abcd             | abcd   | abcd             | abcd   | abcd      | abcd      |
| NH009b                                | 13 | abcd        | abcd   | abcd   | abcd   | abcd        | abcd   | abcd   | abcd             | abcd   | abcd             | abcd   | abcd      | abcd      |
| NZ03c01x_2                            | 13 | llm         | llm    | llm    | llm    | nnnp        | nnnp   | nnnp   | nnnp             | nnnp   | llm              | llm    | np1np2    | np1np2    |

| Tetraploid seedlings from six crosses |    |             |        |        |        |             |        |        |                  |        |                  |        |           |           |
|---------------------------------------|----|-------------|--------|--------|--------|-------------|--------|--------|------------------|--------|------------------|--------|-----------|-----------|
| Markers                               | LG | Gala × Fuji |        |        |        | Fuji × Gala |        |        | Fuji × Pink Lady |        | Pink Lady × Fuji |        | M 26 × Fu | M 27 × Fu |
|                                       |    | GF56        | GF57   | GF58   | GF59   | FG54        | FG55   | FG56   | FP36             | FP37   | PF35             | PF36   | M26F28    | M27F29    |
| CH01g05                               | 14 | abcd        | abcd   | abcd   | abcd   | abcd        | abcd   | abcd   | abcd             | abcd   | abcd             | abcd   | hkhk      | abcd      |
| CH03a02                               | 14 | abcd        | abcd   | abcd   | abcd   | abcd        | abcd   | abcd   | abcd             | abcd   | abcd             | abcd   | abcd      | abcd      |
| CH03d08                               | 14 | abcd        | abcd   | abcd   | abcd   | abcd        | abcd   | abcd   | abcd             | abcd   | abcd             | abcd   | abcd      | abcd      |
| CH05g07z_1                            | 14 | hkhk        | hkhk   | hkhk   | hkhk   | hkhk        | hkhk   | hkhk   | hkhk             | hkhk   | hkhk             | hkhk   | hkhk      | abcd      |
| CH05g07z_2                            | 14 | hkhk        | hkhk   | hkhk   | hkhk   | hkhk        | hkhk   | hkhk   | hkhk             | hkhk   | hkhk             | hkhk   | hkhk      | hkhk      |
| CH02c02a_1                            | 15 | abcd        | abcd   | abcd   | abcd   | abcd        | abcd   | abcd   | abcd             | abcd   | abcd             | abcd   | abcd      | abcd      |
| CH02c09                               | 15 | lm1lm2      | lm1lm2 | lm1lm2 | lm1lm2 | np1np2      | np1np2 | np1np2 | np1np2           | np1np2 | llm1m2           | llm1m2 | abcd      | abcd      |
| CH02d11                               | 15 | abcd        | abcd   | abcd   | abcd   | abcd        | abcd   | abcd   | abcd             | abcd   | abcd             | abcd   | abcd      | abcd      |
| CH03b10                               | 15 | abcd        | abcd   | abcd   | abcd   | abcd        | abcd   | abcd   | abcd             | abcd   | abcd             | abcd   | abcd      | abcd      |
| Hi02g06                               | 15 | np1np2      | np1np2 | np1np2 | np1np2 | lm1lm2      | lm1lm2 | lm1lm2 | llm1m2           | llm1m2 | np1np2           | np1np2 | abcd      | nnnp      |
| Hi04c05                               | 15 | abcd        | abcd   | abcd   | abcd   | abcd        | abcd   | abcd   | abcd             | abcd   | abcd             | abcd   | abcd      | abcd      |
| Hi06f09                               | 15 | abcd        | abcd   | abcd   | abcd   | abcd        | abcd   | abcd   | llm1m2           | llm1m2 | np1np2           | np1np2 | abcd      | abcd      |
| NZ02b01                               | 15 | abcd        | abcd   | abcd   | abcd   | abcd        | abcd   | abcd   | abcd             | abcd   | abcd             | abcd   | abcd      | abcd      |
| CH02d10a                              | 16 | abcd        | abcd   | abcd   | abcd   | abcd        | abcd   | abcd   | abcd             | abcd   | abcd             | abcd   | abcd      | efeg      |
| CH04f10                               | 16 | abcd        | abcd   | abcd   | abcd   | abcd        | abcd   | abcd   | llm              | llm    | nnnp             | nnnp   | llm       | llm       |
| CH05a04                               | 16 | abcd        | abcd   | abcd   | abcd   | abcd        | abcd   | abcd   | abcd             | abcd   | abcd             | abcd   | efeg      | efeg      |
| CH05b06z_1                            | 16 | efeg        | efeg   | efeg   | efeg   | efeg        | efeg   | efeg   | abcd             | abcd   | abcd             | abcd   | abcd      | efeg      |
| CH05c06_2                             | 16 | abcd        | abcd   | abcd   | abcd   | abcd        | abcd   | abcd   | abcd             | abcd   | abcd             | abcd   | abcd      | abcd      |
| Hi01c11x                              | 16 | efeg        | efeg   | efeg   | efeg   | efeg        | efeg   | efeg   | efeg             | efeg   | efeg             | efeg   | abcd      | abcd      |
| Hi01d06y                              | 16 | abcd        | abcd   | abcd   | abcd   | abcd        | abcd   | abcd   | efeg             | efeg   | efeg             | efeg   | abcd      | abcd      |
| Hi04e04                               | 16 | abcd        | abcd   | abcd   | abcd   | abcd        | abcd   | abcd   | efeg             | efeg   | efeg             | efeg   | efeg      | abcd      |
| CH01h01                               | 17 | abcd        | abcd   | abcd   | abcd   | abcd        | abcd   | abcd   | abcd             | abcd   | abcd             | abcd   | abcd      | abcd      |
| CH04c06y_2                            | 17 | abcd        | abcd   | abcd   | abcd   | abcd        | abcd   | abcd   | llm              | llm    | nnnp             | nnnp   | abcd      | abcd      |
| CH04c06y_3                            | 17 | lm1lm2      | lm1lm2 | lm1lm2 | lm1lm2 | np1np2      | np1np2 | np1np2 | nnnp             | nnnp   | llm              | llm    | llm1m2    | llm1m2    |
| CH05d08y_1                            | 17 | abcd        | abcd   | abcd   | abcd   | abcd        | abcd   | abcd   | abcd             | abcd   | abcd             | abcd   | abcd      | abcd      |
| CH05g03                               | 17 | abcd        | abcd   | abcd   | abcd   | abcd        | abcd   | abcd   | llm1m2           | llm1m2 | np1np2           | np1np2 | abcd      | abcd      |
| GD96                                  | 17 | lm1lm2      | lm1lm2 | lm1lm2 | lm1lm2 | np1np2      | np1np2 | np1np2 | nnnp             | nnnp   | llm              | llm    | llm       | llm1m2    |
| Hi03c05                               | 17 | llm         | llm    | llm    | llm    | nnnp        | nnnp   | nnnp   | np1np2           | np1np2 | llm1m2           | llm1m2 | abcd      | abcd      |
| Hi05c06_1                             | 17 | llm         | llm    | llm    | llm    | nnnp        | nnnp   | nnnp   | nnnp             | nnnp   | llm              | llm    | hkhk      | np1np2    |
| Hi07b02_1                             | 17 | llm         | llm    | llm    | llm    | nnnp        | nnnp   | nnnp   | np1np2           | np1np2 | llm1m2           | llm1m2 | abcd      | abcd      |
| Hi07b02_2                             | 17 | nnnp        | nnnp   | nnnp   | nnnp   | llm         | llm    | llm    | llm              | llm    | nnnp             | nnnp   | abcd      | abcd      |
