# Supplementary material for: Molecular Genetic Features of Polyploidization and Aneuploidization Reveal Unique Patterns for Genome Duplication in Diploid Malus
Source: PubMed Central journal article supplement (PMC3254611; doi:10.1371/journal.pone.0029449), 2012-01-10
Supplement: pone.0029449.s013.pdf [file pone.0029449.s013.pdf]

| Crosses          | 2n-1 | 2n+1 | 2n+3 | 2n+6 | 2n+7 | 2n+8 | 2n+9 | 2n+10 | 2n+11 | Total |
|------------------|------|------|------|------|------|------|------|-------|-------|-------|
| Gala × Fuji      | 2    | 5    | 3    | 5    | 7    | 7    | 5    | 4     | 2     | 40    |
| Fuji × Gala      | 1    | 4    | 3    | 5    | 8    | 7    | 5    | 2     | 2     | 37    |
| Fuji × Pink Lady | 1    | 3    | 1    | 4    | 5    | 6    | 3    | 2     | 1     | 26    |
| Pink Lady × Fuji | 1    | 2    | 0    | 4    | 6    | 5    | 3    | 3     | 0     | 24    |
| M 26 × Fu 2      | 0    | 1    | 1    | 5    | 6    | 4    | 3    | 2     | 1     | 23    |
| M 27 × Fu 2      | 0    | 2    | 2    | 4    | 7    | 5    | 3    | 2     | 0     | 25    |
| CO 2 × RO 6      | 1    | 2    | 1    | 5    | 7    | 7    | 2    | 1     | 1     | 27    |
| Total            | 6    | 19   | 11   | 32   | 46   | 41   | 24   | 16    | 7     | 202   |
