# Supplementary material for: Molecular Genetic Features of Polyploidization and Aneuploidization Reveal Unique Patterns for Genome Duplication in Diploid Malus
Source: PubMed Central journal article supplement (PMC3254611; doi:10.1371/journal.pone.0029449), 2012-01-10
Supplement: pone.0029449.s014.pdf [file pone.0029449.s014.pdf]

| Progenies | The affected chromosome |      |      |      |      |      |      |      |      |      |      |      |      |      |      |
|-----------|-------------------------|------|------|------|------|------|------|------|------|------|------|------|------|------|------|
|           | LG02                    | LG03 | LG04 | LG05 | LG06 | LG07 | LG09 | LG10 | LG11 | LG12 | LG13 | LG14 | LG15 | LG16 | LG17 |
| GF01      | 1                       |      |      |      |      |      |      |      |      |      |      |      |      |      |      |
| GF02      |                         |      |      |      |      |      |      |      |      |      |      |      |      |      | 1    |
| FG01      |                         |      |      |      |      |      |      | 1    |      |      |      |      |      |      |      |
| FP01      | 1                       |      |      |      |      |      |      |      |      |      |      |      |      |      |      |
| PF01      |                         |      |      |      |      |      |      |      |      |      |      |      |      |      | 1    |
| CR01      |                         |      |      |      |      |      |      | 1    |      |      |      |      |      |      |      |
