# Supplementary material for: Molecular Genetic Features of Polyploidization and Aneuploidization Reveal Unique Patterns for Genome Duplication in Diploid Malus
Source: PubMed Central journal article supplement (PMC3254611; doi:10.1371/journal.pone.0029449), 2012-01-10
Supplement: pone.0029449.s016.pdf [file pone.0029449.s016.pdf]

| Progenies | The affected chromosomes |      |      |      |      |      |      |      |      |      |      |      |      |      |      |
|-----------|--------------------------|------|------|------|------|------|------|------|------|------|------|------|------|------|------|
|           | LG02                     | LG03 | LG04 | LG05 | LG06 | LG07 | LG09 | LG10 | LG11 | LG12 | LG13 | LG14 | LG15 | LG16 | LG17 |
| GF08      |                          | 1    | 1    | 1    |      |      |      |      |      |      |      |      |      |      |      |
| GF09      | 1                        | 1    | 1    |      |      |      |      |      |      |      |      |      |      |      |      |
| GF10      |                          |      |      |      |      |      | 1    | 1    |      | 1    |      |      |      |      |      |
| FG06      |                          |      |      |      |      |      |      |      |      |      |      |      | 1    | 1    | 1    |
| FG07      |                          |      | 1    | 1    | 1    |      |      |      |      |      |      |      |      |      |      |
| FG08      |                          |      |      |      |      |      |      | 1    |      |      | 1    |      |      | 1    |      |
| FP05      | 1                        |      |      |      |      |      |      | 1    |      | 1    |      |      |      |      |      |
| M26F02    |                          | 1    |      |      |      |      | 1    |      |      |      |      |      | 1    |      |      |
| M27F03    |                          |      |      | 1    |      |      |      | 1    |      |      |      | 1    |      |      |      |
| M27F04    |                          |      |      |      |      |      | 1    |      |      |      |      | 1    | 1    |      |      |
| CR04      |                          |      |      |      |      |      |      |      |      | 1    |      |      |      | 1    | 1    |
