# Supplementary material for: Molecular Genetic Features of Polyploidization and Aneuploidization Reveal Unique Patterns for Genome Duplication in Diploid Malus
Source: PubMed Central journal article supplement (PMC3254611; doi:10.1371/journal.pone.0029449), 2012-01-10
Supplement: pone.0029449.s017.pdf [file pone.0029449.s017.pdf]

| Progenies | The affected chromosomes |      |      |      |      |      |      |      |      |      |      |      |      |      |      |
|-----------|--------------------------|------|------|------|------|------|------|------|------|------|------|------|------|------|------|
|           | LG02                     | LG03 | LG04 | LG05 | LG06 | LG07 | LG09 | LG10 | LG11 | LG12 | LG13 | LG14 | LG15 | LG16 | LG17 |
| GF11      | 1                        | 1    |      | 1    | 1    |      |      |      |      |      |      |      | 1    |      | 1    |
| GF12      | 1                        | 1    | 1    |      | 1    |      |      |      | 1    |      |      |      |      | 1    |      |
| GF13      | 1                        |      |      | 1    | 1    | 1    |      |      |      |      | 1    |      |      | 1    |      |
| GF14      |                          | 1    |      |      | 1    |      | 1    | 1    |      |      |      |      |      | 1    | 1    |
| GF15      |                          |      |      | 1    | 1    |      | 1    |      |      | 1    | 1    | 1    |      |      |      |
| FG09      |                          |      | 1    |      |      |      | 1    | 1    |      | 1    |      | 1    |      |      | 1    |
| FG10      | 1                        |      |      |      |      |      | 1    |      |      | 1    |      |      | 1    | 1    | 1    |
| FG11      |                          |      |      | 1    | 1    |      | 1    |      |      | 1    | 1    |      | 1    |      |      |
| FG12      | 1                        |      | 1    |      |      |      | 1    | 1    |      | 1    | 1    |      |      |      |      |
| FG13      | 1                        | 1    | 1    |      |      |      |      | 1    |      |      |      | 1    |      |      | 1    |
| FP06      |                          | 1    | 1    | 1    |      |      | 1    | 1    |      |      |      |      |      | 1    |      |
| FP07      |                          |      | 1    |      |      |      | 1    | 1    |      |      |      |      | 1    | 1    | 1    |
| FP08      | 1                        |      | 1    | 1    | 1    |      |      |      |      |      |      |      | 1    |      | 1    |
| FP09      |                          | 1    | 1    |      | 1    |      |      |      | 1    |      |      | 1    |      |      | 1    |
| PF04      |                          |      |      |      |      |      | 1    | 1    |      |      | 1    | 1    |      | 1    | 1    |
| PF05      |                          |      |      |      |      |      | 1    | 1    | 1    | 1    |      |      | 1    |      | 1    |
| PF06      | 1                        |      | 1    | 1    |      |      | 1    |      |      | 1    | 1    |      |      |      |      |
| PF07      |                          |      | 1    |      |      |      | 1    | 1    |      | 1    | 1    |      | 1    |      |      |
| M26F03    | 1                        |      |      |      |      |      | 1    | 1    | 1    |      |      | 1    |      |      | 1    |
| M26F04    |                          | 1    | 1    | 1    | 1    |      |      |      |      |      |      | 1    | 1    |      |      |
| M26F05    |                          | 1    | 1    |      | 1    |      | 1    | 1    |      |      |      |      |      | 1    |      |
| M26F06    | 1                        |      |      |      |      |      |      | 1    |      | 1    |      |      | 1    | 1    | 1    |
| M26F07    | 1                        | 1    |      | 1    | 1    |      |      |      |      | 1    |      |      | 1    |      |      |
| M27F05    |                          |      | 1    | 1    | 1    |      | 1    | 1    |      |      |      |      |      | 1    |      |
| M27F06    |                          |      |      | 1    |      |      | 1    | 1    |      | 1    |      |      |      | 1    | 1    |
| M27F07    |                          | 1    | 1    | 1    |      |      |      |      |      | 1    |      |      |      | 1    | 1    |
| M27F08    |                          | 1    | 1    | 1    |      |      |      |      | 1    |      | 1    | 1    |      |      |      |
| CR05      | 1                        |      |      |      |      | 1    | 1    | 1    |      |      |      | 1    |      | 1    |      |
| CR06      |                          |      |      |      |      |      | 1    | 1    |      |      | 1    |      | 1    | 1    | 1    |
| CR07      |                          |      |      | 1    | 1    |      |      |      | 1    | 1    | 1    | 1    |      |      |      |
| CR08      |                          |      | 1    |      |      |      |      | 1    |      | 1    | 1    |      | 1    | 1    |      |
| CR09      |                          |      | 1    |      |      |      |      | 1    | 1    |      | 1    |      |      | 1    | 1    |
