# Supplementary material for: Molecular Genetic Features of Polyploidization and Aneuploidization Reveal Unique Patterns for Genome Duplication in Diploid Malus
Source: PubMed Central journal article supplement (PMC3254611; doi:10.1371/journal.pone.0029449), 2012-01-10
Supplement: pone.0029449.s018.pdf [file pone.0029449.s018.pdf]

| Progenies | The affected chromosomes |      |      |      |      |      |      |      |      |      |      |      |      |      |      |
|-----------|--------------------------|------|------|------|------|------|------|------|------|------|------|------|------|------|------|
|           | LG02                     | LG03 | LG04 | LG05 | LG06 | LG07 | LG09 | LG10 | LG11 | LG12 | LG13 | LG14 | LG15 | LG16 | LG17 |
| GF16      |                          |      | 1    | 1    |      |      |      | 1    |      | 1    |      |      | 1    | 1    | 1    |
| GF17      |                          |      |      | 1    | 1    |      | 1    | 1    | 1    | 1    | 1    |      |      |      |      |
| GF18      | 1                        |      | 1    |      |      |      | 1    | 1    |      | 1    | 1    |      |      |      | 1    |
| GF19      | 1                        | 1    | 1    |      |      |      |      | 1    |      | 1    |      | 1    |      |      | 1    |
| GF20      |                          | 1    | 1    |      | 1    |      | 1    | 1    |      | 1    | 1    |      |      |      |      |
| GF21      | 1                        |      |      |      |      | 1    | 1    | 1    |      | 1    |      |      |      | 1    | 1    |
| GF22      |                          | 1    |      | 1    | 1    |      |      | 1    |      | 1    |      | 1    |      |      | 1    |
| FG14      | 1                        |      | 1    |      | 1    |      | 1    |      | 1    |      |      |      | 1    | 1    |      |
| FG15      | 1                        |      |      | 1    | 1    |      | 1    | 1    |      |      | 1    |      |      | 1    |      |
| FG16      |                          | 1    |      |      |      |      | 1    | 1    |      | 1    |      |      | 1    | 1    | 1    |
| FG17      |                          |      | 1    | 1    | 1    |      | 1    |      |      | 1    | 1    | 1    |      |      |      |
| FG18      | 1                        | 1    |      | 1    | 1    |      |      |      |      |      | 1    |      | 1    | 1    |      |
| FG19      |                          | 1    | 1    |      |      |      | 1    | 1    |      | 1    |      | 1    |      |      | 1    |
| FG20      |                          |      |      | 1    |      |      | 1    | 1    |      | 1    |      | 1    | 1    |      | 1    |
| FG21      |                          |      |      | 1    | 1    |      |      | 1    |      | 1    | 1    |      | 1    |      | 1    |
| FP10      | 1                        |      | 1    |      |      |      | 1    | 1    | 1    | 1    | 1    |      |      |      |      |
| FP11      | 1                        |      | 1    |      |      |      | 1    | 1    |      | 1    |      | 1    |      |      | 1    |
| FP12      | 1                        |      | 1    | 1    |      |      | 1    |      |      |      | 1    | 1    |      | 1    |      |
| FP13      |                          |      | 1    |      |      |      | 1    | 1    |      |      | 1    |      | 1    | 1    | 1    |
| FP14      | 1                        |      | 1    |      |      |      | 1    | 1    | 1    |      |      | 1    |      |      | 1    |
| PF08      |                          | 1    | 1    | 1    | 1    |      |      |      |      |      |      | 1    | 1    |      | 1    |
| PF09      |                          | 1    | 1    |      | 1    |      | 1    | 1    |      | 1    | 1    |      |      |      |      |
| PF10      | 1                        |      |      | 1    |      |      | 1    | 1    |      | 1    |      |      |      | 1    | 1    |
| PF11      |                          | 1    |      | 1    | 1    |      |      |      |      | 1    |      |      | 1    | 1    | 1    |
| PF12      | 1                        | 1    | 1    |      | 1    |      |      |      | 1    |      |      |      | 1    | 1    |      |
| PF13      | 1                        |      |      | 1    | 1    |      | 1    |      |      |      | 1    |      |      | 1    | 1    |
| M26F08    |                          | 1    |      |      |      |      | 1    | 1    |      | 1    |      |      | 1    | 1    | 1    |
| M26F09    |                          |      | 1    | 1    | 1    |      | 1    |      |      | 1    | 1    | 1    |      |      |      |
| M26F10    | 1                        | 1    |      | 1    |      |      | 1    |      |      |      | 1    |      | 1    | 1    |      |
| M26F11    |                          |      | 1    |      |      |      | 1    | 1    | 1    | 1    |      | 1    |      |      | 1    |
| M26F12    | 1                        | 1    | 1    | 1    | 1    |      |      |      |      | 1    |      |      | 1    |      |      |
| M26F13    |                          |      | 1    | 1    | 1    |      | 1    | 1    | 1    | 1    |      |      |      |      |      |
| M27F09    |                          |      |      | 1    |      |      | 1    | 1    |      | 1    |      |      | 1    | 1    | 1    |
| M27F10    |                          | 1    | 1    | 1    |      |      |      |      |      | 1    | 1    |      |      | 1    | 1    |
| M27F11    |                          | 1    | 1    | 1    |      |      |      |      | 1    |      | 1    | 1    |      | 1    |      |
| M27F12    | 1                        |      |      |      |      | 1    | 1    | 1    |      |      |      | 1    | 1    | 1    |      |
| M27F13    | 1                        |      |      |      | 1    |      | 1    | 1    |      |      |      |      | 1    | 1    | 1    |
| M27F14    | 1                        |      | 1    | 1    | 1    |      | 1    |      |      |      | 1    | 1    |      |      |      |
| M27F15    | 1                        |      | 1    |      |      |      | 1    | 1    |      | 1    | 1    |      | 1    |      |      |
| CR10      |                          | 1    | 1    |      |      |      | 1    | 1    |      |      |      | 1    |      | 1    | 1    |
| CR11      |                          | 1    | 1    | 1    | 1    | 1    |      |      |      |      |      |      | 1    | 1    |      |
| CR12      |                          | 1    | 1    | 1    |      |      | 1    | 1    |      |      | 1    |      |      | 1    |      |
| CR13      |                          |      |      | 1    |      |      | 1    | 1    |      | 1    |      |      | 1    | 1    | 1    |
| CR14      | 1                        |      | 1    | 1    | 1    |      |      |      |      |      |      |      | 1    | 1    | 1    |
| CR15      |                          | 1    |      | 1    | 1    |      |      |      | 1    |      |      |      | 1    | 1    | 1    |
| CR16      | 1                        |      |      |      |      |      | 1    | 1    |      |      | 1    | 1    |      | 1    | 1    |
