# Supplementary material for: Molecular Genetic Features of Polyploidization and Aneuploidization Reveal Unique Patterns for Genome Duplication in Diploid Malus
Source: PubMed Central journal article supplement (PMC3254611; doi:10.1371/journal.pone.0029449), 2012-01-10
Supplement: pone.0029449.s019.pdf [file pone.0029449.s019.pdf]

| Progenies | The affected chromosomes |      |      |      |      |      |      |      |      |      |      |      |      |      |      |  |
|-----------|--------------------------|------|------|------|------|------|------|------|------|------|------|------|------|------|------|--|
|           | LG02                     | LG03 | LG04 | LG05 | LG06 | LG07 | LG09 | LG10 | LG11 | LG12 | LG13 | LG14 | LG15 | LG16 | LG17 |  |
| GF23      |                          | 1    | 1    | 1    | 1    |      |      |      |      |      |      | 1    | 1    | 1    | 1    |  |
| GF24      |                          | 1    | 1    | 1    | 1    |      | 1    | 1    |      | 1    | 1    |      |      |      |      |  |
| GF25      | 1                        |      |      | 1    |      |      |      | 1    | 1    | 1    |      |      | 1    | 1    | 1    |  |
| GF26      | 1                        |      | 1    | 1    | 1    |      |      | 1    |      |      |      |      | 1    | 1    | 1    |  |
| GF27      | 1                        | 1    | 1    |      | 1    |      |      | 1    | 1    |      |      |      |      | 1    | 1    |  |
| GF28      | 1                        |      | 1    | 1    | 1    |      | 1    |      |      |      | 1    |      |      | 1    | 1    |  |
| GF29      |                          |      | 1    |      |      |      | 1    | 1    |      | 1    | 1    |      | 1    | 1    | 1    |  |
| FG22      |                          |      | 1    | 1    | 1    |      | 1    |      |      | 1    | 1    | 1    | 1    |      |      |  |
| FG23      | 1                        | 1    |      | 1    |      |      | 1    | 1    |      |      | 1    | 1    |      | 1    |      |  |
| FG24      |                          |      | 1    | 1    |      |      | 1    | 1    | 1    | 1    |      |      |      | 1    | 1    |  |
| FG25      | 1                        | 1    | 1    | 1    | 1    |      |      |      | 1    |      |      |      | 1    | 1    |      |  |
| FG26      |                          | 1    | 1    | 1    | 1    |      | 1    | 1    | 1    | 1    |      |      |      |      |      |  |
| FG27      |                          |      |      | 1    |      |      | 1    | 1    | 1    | 1    |      |      | 1    | 1    | 1    |  |
| FG28      |                          | 1    | 1    | 1    |      |      | 1    |      |      | 1    | 1    |      |      | 1    | 1    |  |
| FP15      |                          | 1    | 1    | 1    |      |      |      |      | 1    | 1    | 1    |      |      | 1    | 1    |  |
| FP16      | 1                        | 1    |      |      |      | 1    | 1    | 1    |      |      |      |      | 1    | 1    | 1    |  |
| FP17      |                          |      |      |      | 1    | 1    | 1    | 1    |      | 1    |      |      | 1    | 1    | 1    |  |
| FP18      |                          |      | 1    | 1    |      |      | 1    | 1    |      | 1    | 1    | 1    | 1    |      |      |  |
| FP19      | 1                        |      | 1    |      |      |      | 1    | 1    |      | 1    | 1    |      | 1    | 1    |      |  |
| FP20      | 1                        | 1    | 1    |      |      |      | 1    | 1    |      |      |      | 1    |      | 1    | 1    |  |
| PF14      | 1                        | 1    | 1    | 1    | 1    | 1    | 1    |      |      |      |      |      |      | 1    |      |  |
| PF15      |                          |      | 1    | 1    | 1    |      | 1    | 1    | 1    | 1    | 1    |      |      |      |      |  |
| PF16      | 1                        |      | 1    |      |      |      | 1    | 1    |      | 1    | 1    |      | 1    |      | 1    |  |
| PF17      | 1                        | 1    |      | 1    | 1    |      |      | 1    |      | 1    |      |      |      | 1    | 1    |  |
| PF18      | 1                        | 1    | 1    |      | 1    |      | 1    | 1    |      | 1    | 1    |      |      |      |      |  |
| M26F14    | 1                        |      |      |      | 1    | 1    | 1    | 1    |      | 1    |      |      |      | 1    | 1    |  |
| M26F15    |                          | 1    |      | 1    | 1    |      | 1    |      |      | 1    | 1    |      |      | 1    | 1    |  |
| M26F16    | 1                        |      |      | 1    | 1    |      | 1    |      | 1    |      |      | 1    | 1    | 1    |      |  |
| M26F17    | 1                        |      | 1    | 1    | 1    |      | 1    | 1    |      | 1    |      |      |      | 1    |      |  |
| M27F16    |                          |      | 1    |      |      |      | 1    | 1    | 1    | 1    |      |      | 1    | 1    | 1    |  |
| M27F17    |                          |      | 1    | 1    | 1    |      |      | 1    |      | 1    | 1    | 1    | 1    |      |      |  |
| M27F18    | 1                        | 1    |      | 1    |      |      | 1    |      |      |      | 1    | 1    | 1    | 1    |      |  |
| M27F19    |                          | 1    | 1    |      |      |      | 1    | 1    |      | 1    |      | 1    | 1    |      | 1    |  |
| M27F20    |                          |      |      | 1    | 1    |      | 1    | 1    |      | 1    |      | 1    | 1    |      | 1    |  |
| CR17      |                          |      |      | 1    | 1    |      |      | 1    |      | 1    | 1    | 1    | 1    |      | 1    |  |
| CR18      | 1                        | 1    | 1    |      |      |      | 1    | 1    | 1    | 1    | 1    |      |      |      |      |  |
| CR19      | 1                        |      |      | 1    |      |      | 1    | 1    |      | 1    | 1    | 1    |      |      | 1    |  |
| CR20      | 1                        |      | 1    | 1    |      |      | 1    |      |      |      | 1    | 1    |      | 1    | 1    |  |
| CR21      |                          | 1    | 1    |      |      |      | 1    | 1    |      | 1    | 1    |      | 1    | 1    |      |  |
| CR22      | 1                        | 1    |      |      | 1    |      | 1    | 1    | 1    |      |      | 1    |      |      | 1    |  |
| CR23      |                          |      | 1    | 1    | 1    |      | 1    | 1    |      |      |      | 1    |      | 1    | 1    |  |
