# Supplementary material for: Molecular Genetic Features of Polyploidization and Aneuploidization Reveal Unique Patterns for Genome Duplication in Diploid Malus
Source: PubMed Central journal article supplement (PMC3254611; doi:10.1371/journal.pone.0029449), 2012-01-10
Supplement: pone.0029449.s020.pdf [file pone.0029449.s020.pdf]

| Progenies | The affected chromosomes |      |      |      |      |      |      |      |      |      |      |      |      |      |      |
|-----------|--------------------------|------|------|------|------|------|------|------|------|------|------|------|------|------|------|
|           | LG02                     | LG03 | LG04 | LG05 | LG06 | LG07 | LG09 | LG10 | LG11 | LG12 | LG13 | LG14 | LG15 | LG16 | LG17 |
| GF30      |                          |      |      | 1    | 1    |      | 1    | 1    | 1    | 1    |      |      | 1    | 1    | 1    |
| GF31      |                          | 1    | 1    | 1    |      |      | 1    |      |      | 1    | 1    |      | 1    | 1    | 1    |
| GF32      | 1                        | 1    | 1    | 1    |      |      |      |      | 1    | 1    | 1    | 1    |      | 1    |      |
| GF33      | 1                        |      |      |      |      | 1    | 1    | 1    |      |      | 1    | 1    | 1    | 1    | 1    |
| GF34      | 1                        |      |      |      |      | 1    | 1    | 1    |      |      | 1    | 1    | 1    | 1    | 1    |
| FG29      | 1                        |      | 1    | 1    |      |      | 1    | 1    |      | 1    | 1    | 1    | 1    |      |      |
| FG30      | 1                        |      | 1    |      | 1    |      | 1    | 1    |      | 1    | 1    |      | 1    | 1    |      |
| FG31      | 1                        | 1    | 1    |      | 1    |      | 1    | 1    |      |      |      | 1    |      | 1    | 1    |
| FG32      | 1                        | 1    | 1    | 1    | 1    | 1    | 1    | 1    |      |      |      |      |      | 1    |      |
| FG33      | 1                        |      | 1    | 1    | 1    |      | 1    | 1    | 1    | 1    | 1    |      |      |      |      |
| FP21      | 1                        |      | 1    |      |      |      | 1    | 1    |      | 1    | 1    |      | 1    | 1    | 1    |
| FP22      | 1                        | 1    | 1    | 1    | 1    |      |      | 1    |      | 1    |      | 1    |      |      | 1    |
| FP23      |                          | 1    | 1    | 1    | 1    |      | 1    |      |      |      |      | 1    | 1    | 1    | 1    |
| PF19      |                          | 1    | 1    | 1    | 1    |      | 1    | 1    |      | 1    | 1    |      |      |      | 1    |
| PF20      | 1                        |      |      | 1    |      |      | 1    | 1    | 1    | 1    |      |      | 1    | 1    | 1    |
| PF21      |                          | 1    | 1    | 1    | 1    |      |      | 1    |      | 1    |      |      | 1    | 1    | 1    |
| M26F18    | 1                        | 1    | 1    |      | 1    |      |      | 1    | 1    |      |      |      | 1    | 1    | 1    |
| M26F19    | 1                        |      | 1    | 1    | 1    |      | 1    | 1    |      |      | 1    |      |      | 1    | 1    |
| M26F20    |                          | 1    |      | 1    |      |      | 1    | 1    |      | 1    | 1    |      | 1    | 1    | 1    |
| M27F21    |                          |      | 1    | 1    | 1    |      | 1    |      |      | 1    | 1    | 1    | 1    |      | 1    |
| M27F22    | 1                        | 1    |      | 1    |      |      | 1    | 1    |      |      | 1    | 1    |      | 1    | 1    |
| M27F23    |                          |      | 1    | 1    |      |      | 1    | 1    | 1    | 1    |      | 1    |      | 1    | 1    |
| CR24      | 1                        | 1    | 1    | 1    | 1    |      |      |      |      | 1    |      |      | 1    | 1    | 1    |
| CR25      | 1                        | 1    | 1    | 1    | 1    |      | 1    | 1    | 1    | 1    |      |      |      |      |      |
