# Supplementary material for: Molecular Genetic Features of Polyploidization and Aneuploidization Reveal Unique Patterns for Genome Duplication in Diploid Malus
Source: PubMed Central journal article supplement (PMC3254611; doi:10.1371/journal.pone.0029449), 2012-01-10
Supplement: pone.0029449.s021.pdf [file pone.0029449.s021.pdf]

| Progenies | The affected chromosomes |      |      |      |      |      |      |      |      |      |      |      |      |      |      |
|-----------|--------------------------|------|------|------|------|------|------|------|------|------|------|------|------|------|------|
|           | LG02                     | LG03 | LG04 | LG05 | LG06 | LG07 | LG09 | LG10 | LG11 | LG12 | LG13 | LG14 | LG15 | LG16 | LG17 |
| GF35      | 1                        | 1    | 1    | 1    | 1    | 1    | 1    | 1    |      |      |      |      |      | 1    | 1    |
| GF36      | 1                        | 1    | 1    | 1    | 1    |      | 1    | 1    | 1    | 1    | 1    |      |      |      |      |
| GF37      | 1                        |      | 1    |      |      |      | 1    | 1    | 1    | 1    | 1    |      | 1    | 1    | 1    |
| GF38      | 1                        | 1    | 1    | 1    | 1    |      |      | 1    |      | 1    |      | 1    |      | 1    | 1    |
| FG34      |                          | 1    | 1    | 1    | 1    |      | 1    |      |      |      | 1    | 1    | 1    | 1    | 1    |
| FG35      | 1                        | 1    | 1    | 1    | 1    |      | 1    | 1    |      | 1    | 1    |      |      |      | 1    |
| FP24      | 1                        |      |      | 1    |      |      | 1    | 1    | 1    | 1    |      | 1    | 1    | 1    | 1    |
| FP25      |                          | 1    | 1    | 1    | 1    |      | 1    | 1    |      | 1    |      |      | 1    | 1    | 1    |
| PF22      |                          |      | 1    | 1    | 1    |      | 1    | 1    | 1    | 1    |      |      | 1    | 1    | 1    |
| PF23      |                          | 1    | 1    | 1    |      |      | 1    | 1    |      | 1    | 1    |      | 1    | 1    | 1    |
| PF24      | 1                        | 1    | 1    | 1    |      |      |      |      | 1    | 1    | 1    | 1    |      | 1    | 1    |
| M26F21    |                          |      |      | 1    | 1    | 1    | 1    | 1    |      |      | 1    | 1    | 1    | 1    | 1    |
| M26F22    | 1                        |      |      |      |      | 1    | 1    | 1    |      | 1    | 1    | 1    | 1    | 1    | 1    |
| M27F24    | 1                        |      | 1    | 1    |      |      | 1    | 1    |      | 1    | 1    | 1    | 1    | 1    |      |
| M27F25    | 1                        |      | 1    |      | 1    |      | 1    | 1    |      | 1    | 1    |      | 1    | 1    | 1    |
| CR26      | 1                        | 1    | 1    |      | 1    |      | 1    | 1    |      |      |      | 1    | 1    | 1    | 1    |
