# Supplementary material for: Molecular Genetic Features of Polyploidization and Aneuploidization Reveal Unique Patterns for Genome Duplication in Diploid Malus
Source: PubMed Central journal article supplement (PMC3254611; doi:10.1371/journal.pone.0029449), 2012-01-10
Supplement: pone.0029449.s022.pdf [file pone.0029449.s022.pdf]

| Progenies | The affected chromosomes |      |      |      |      |      |      |      |      |      |      |      |      |      |      |
|-----------|--------------------------|------|------|------|------|------|------|------|------|------|------|------|------|------|------|
|           | LG02                     | LG03 | LG04 | LG05 | LG06 | LG07 | LG09 | LG10 | LG11 | LG12 | LG13 | LG14 | LG15 | LG16 | LG17 |
| GF39      | 1                        | 1    |      | 1    |      |      | 1    | 1    |      | 1    | 1    | 1    | 1    | 1    | 1    |
| GF40      | 1                        |      | 1    | 1    | 1    |      | 1    | 1    |      | 1    | 1    |      | 1    | 1    | 1    |
| FG36      | 1                        | 1    | 1    | 1    | 1    |      | 1    | 1    |      |      | 1    | 1    |      | 1    | 1    |
| FG37      | 1                        |      | 1    | 1    | 1    |      | 1    | 1    | 1    | 1    |      |      | 1    | 1    | 1    |
| FP26      |                          | 1    | 1    | 1    |      |      | 1    | 1    | 1    | 1    | 1    |      | 1    | 1    | 1    |
| M26F23    | 1                        | 1    | 1    | 1    |      |      | 1    |      | 1    | 1    | 1    | 1    | 1    | 1    |      |
| CR27      |                          |      | 1    | 1    | 1    | 1    | 1    | 1    |      |      | 1    | 1    | 1    | 1    | 1    |
